# Supplementary material for: T3P-Promoted Synthesis of a Series of 2-Aryl-3-phenyl-2,3-dihydro-4H-pyrido[3,2-e][1,3]thiazin-4-ones and Their Activity against the Kinetoplastid Parasite Trypanosoma brucei
Source: MDPI journal article supplement (doi:10.3390/molecules26206099), 2021-10-09
Supplement: s1 [file s1]

## **T3P-Promoted Synthesis of a Series of 2-Aryl-3-phenyl-2,3-dihydro-4*H*-pyrido[3,2-*e*][1,3]thiazin-4-ones and Their Activity Against the Kinetoplastid Parasite *Trypanosoma brucei***

Lee J. Silverberg,<sup>a\*</sup> Megan L. Povelones,<sup>b</sup> Madeline F. Malfara,<sup>b</sup> Tapas K. Mal,<sup>c</sup> Carlos N. Pacheco,<sup>c,d</sup> Anthony F. Lagalante,<sup>e</sup> Mark A. Olsen,<sup>e</sup> Hemant P. Yennawar,<sup>f</sup> Hany F. Sobhi,<sup>g</sup> Kayla R. Baney,<sup>a</sup> Robin L. Bozeman,<sup>a</sup> Craig S. Eroh,<sup>a</sup> Michael J. Fleming,<sup>a</sup> Tracy L. Garcia,<sup>a</sup> Casey L. Gregory,<sup>a</sup> Julia E. Hahn,<sup>a</sup> Alyssa M. Hatter,<sup>a</sup> Lexi Johns,<sup>a</sup> Tianna L. Klinger,<sup>a</sup> Jennie Li,<sup>a</sup> Andrew J. Menig,<sup>a</sup> Grace C. Muench,<sup>a</sup> Melissa E. Ramirez,<sup>a</sup> Jordyn Reilly,<sup>a</sup> Nicole Sacco,<sup>a</sup> Alexandra Sheidy,<sup>a</sup> Marla M. Stoner,<sup>a</sup> Eric N. Thompson,<sup>a</sup> Soroush Yazdani<sup>a</sup>

<sup>a</sup> Schuylkill campus, Pennsylvania State University, 200 University Drive, Schuylkill Haven, PA, USA 17972

<sup>b</sup> Department of Biology, Villanova University, Mendel Science Center, 800 Lancaster Avenue, Villanova, PA, USA 19085

<sup>c</sup> Department of Chemistry, Pennsylvania State University, 104 Chemistry Building, Room 08, University Park, PA, USA 16802

<sup>d</sup> Chemistry and Environmental Science, New Jersey Institute of Technology, Tiernan Hall, Room B006, University Heights, Newark, NJ, USA 07102

<sup>e</sup> Department of Chemistry, Villanova University, Mendel Science Center, 800 Lancaster Avenue, Villanova, PA, USA 19085

<sup>f</sup> Department of Biochemistry and Molecular Biology, Pennsylvania State University, 8 Althouse Laboratory, University Park, PA, USA 16802

<sup>g</sup> Center for Organic Synthesis, Coppin State University, Room-229, 2500 West North Avenue, Baltimore, MD, USA 21216

## Table of Contents

| <u>Content</u>                                                                                        | <u>Page</u> |
|-------------------------------------------------------------------------------------------------------|-------------|
| <b>Figures S1-S13.</b> $^1\text{H}$ NMR spectra of compounds <b>1a-i, k-n</b> .                       | S3          |
| <b>Figures S14-S26.</b> $^{13}\text{C}$ NMR spectra of compounds <b>1a-i, k-n</b> .                   | S16         |
| <b>Figures S27-S30.</b> $^{19}\text{F}$ NMR spectra of compounds <b>1d-e, h-i</b> .                   | S29         |
| <b>Figures S31-S43.</b> FT-IR spectra of compounds <b>1a-i, k-n</b> .                                 | S33         |
| <b>Figures S44-S56.</b> Mass spectra of compounds <b>1a-i, k-n</b> .                                  | S46         |
| <b>Table S1.</b> TbBSF 90-13 growth curve data with 50 $\mu\text{M}$ pyridothiazinones <b>1a-1n</b> . | S59         |

**Figure S1.**  $^1\text{H}$  NMR spectrum of compound **1a** ( $p\text{-NO}_2$ ).

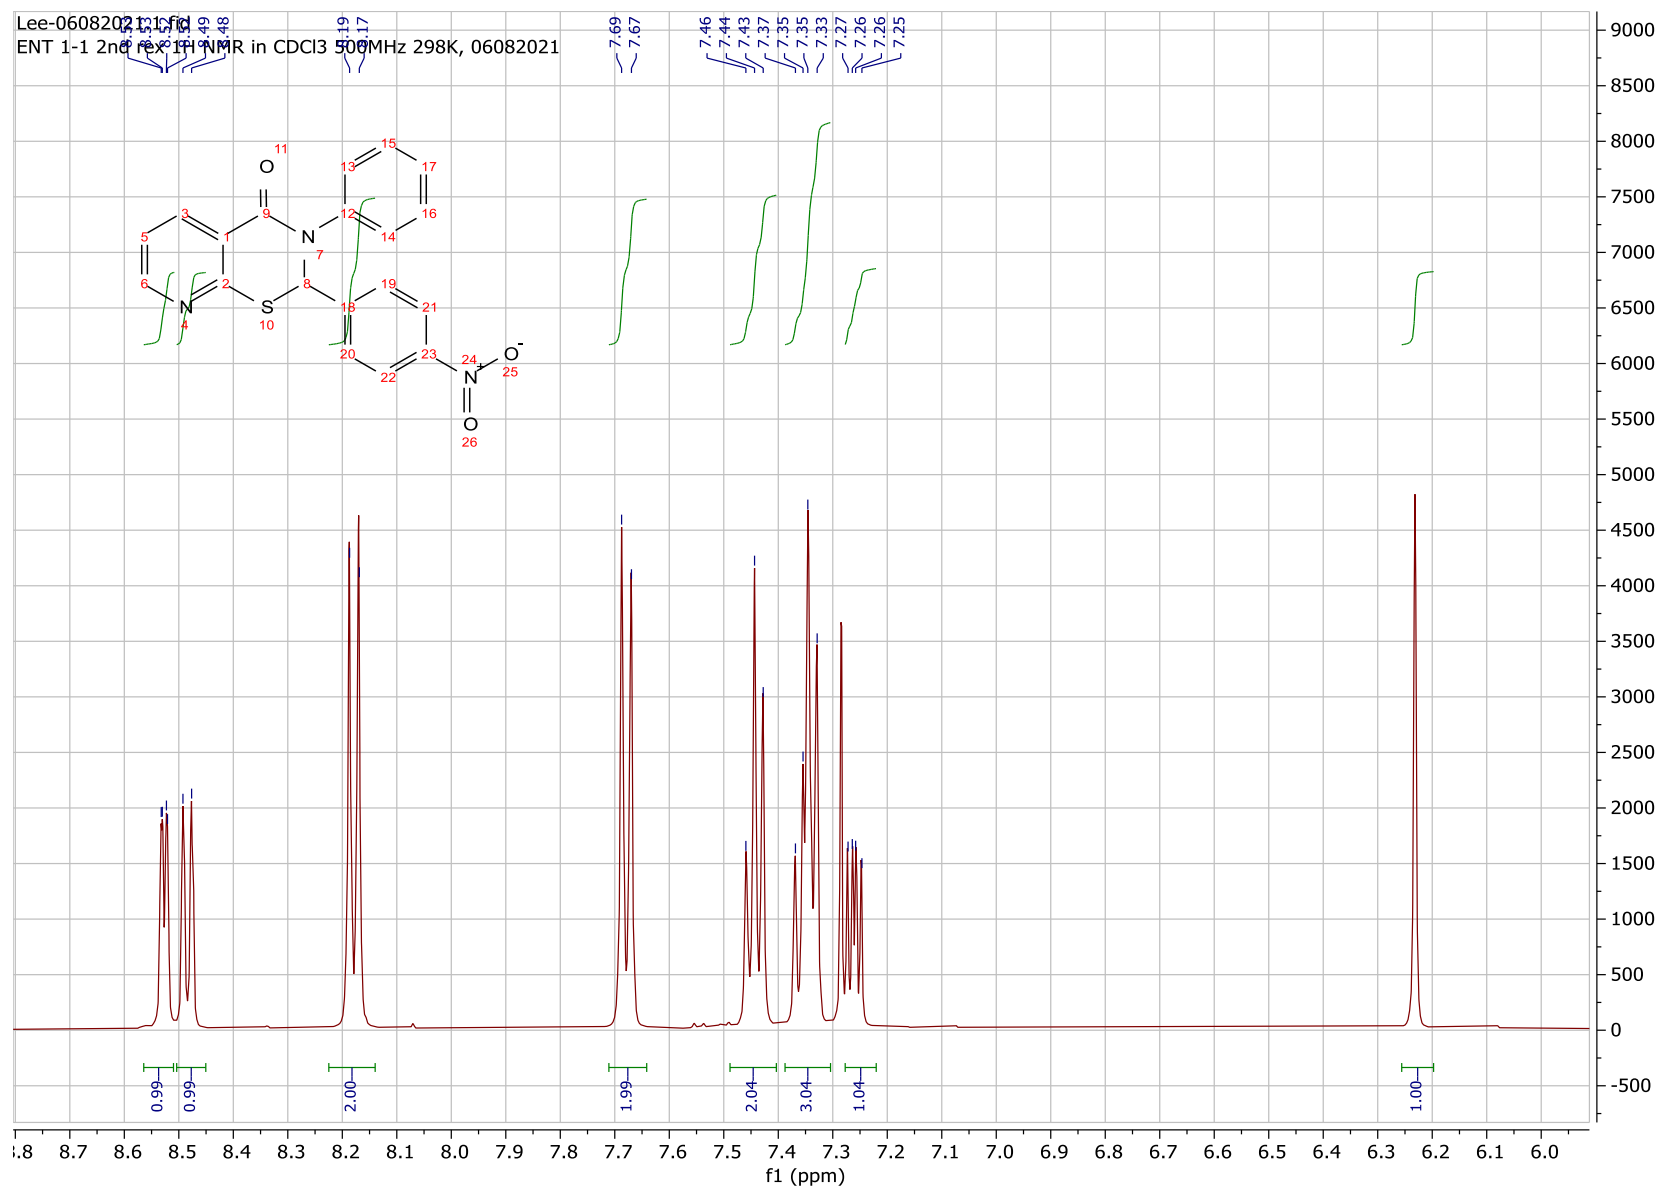

**Figure S2.**  $^1\text{H}$  NMR spectrum of compound **1b** (*m*- $\text{NO}_2$ ).

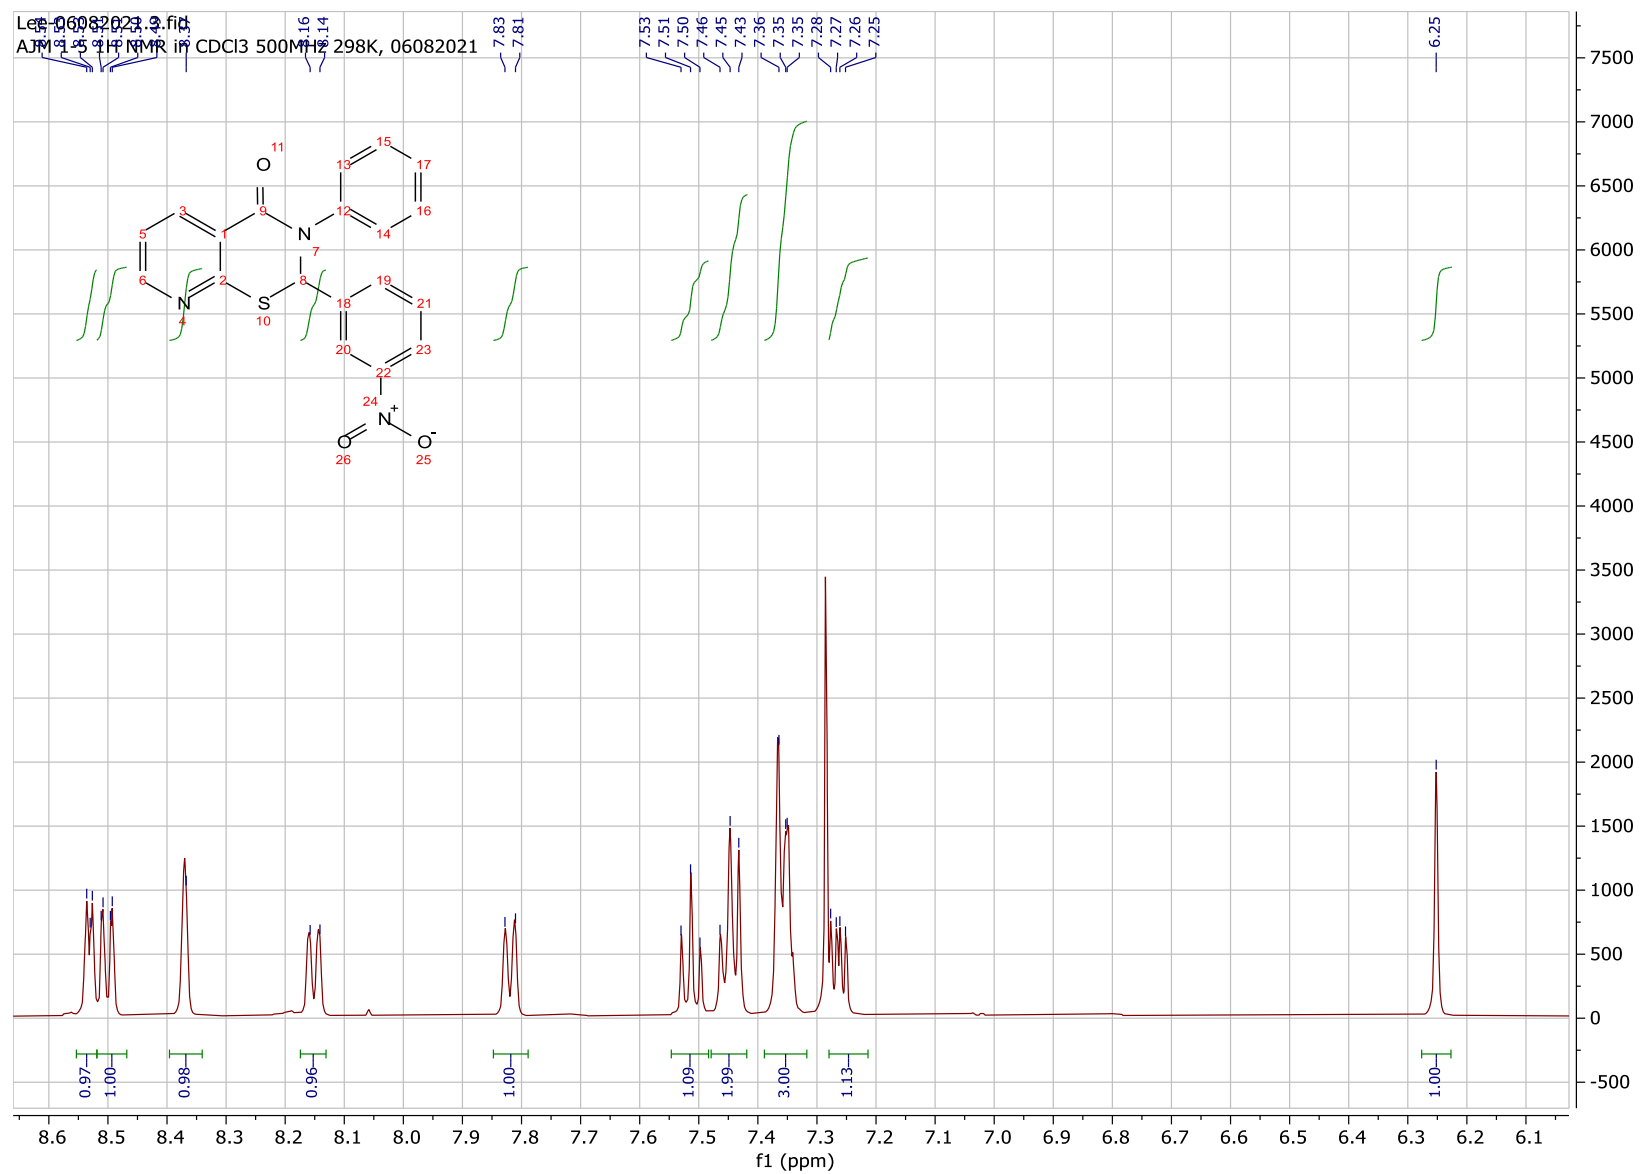

**Figure S3.**  $^1\text{H}$  NMR spectrum of compound **1c** (*o*-NO<sub>2</sub>).

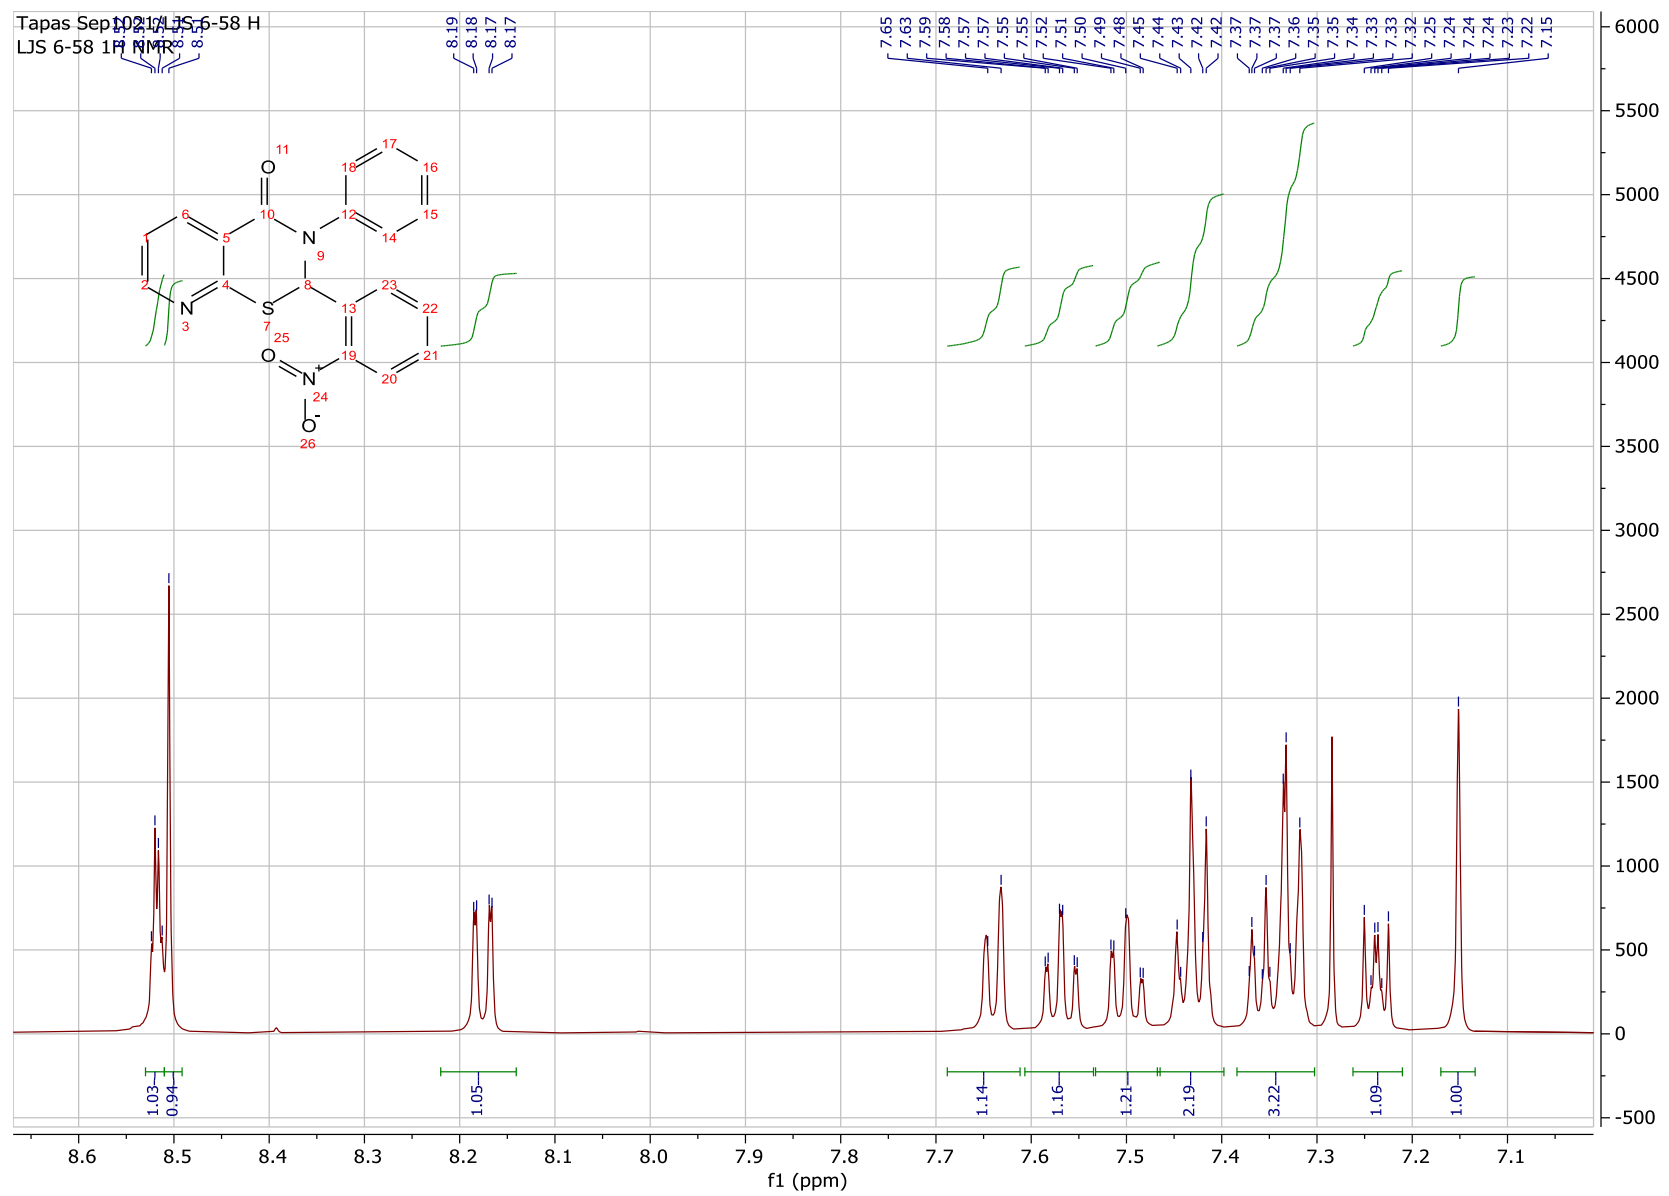

**Figure S4.**  $^1\text{H}$  NMR spectrum of compound **1d** (*p*-CF<sub>3</sub>).

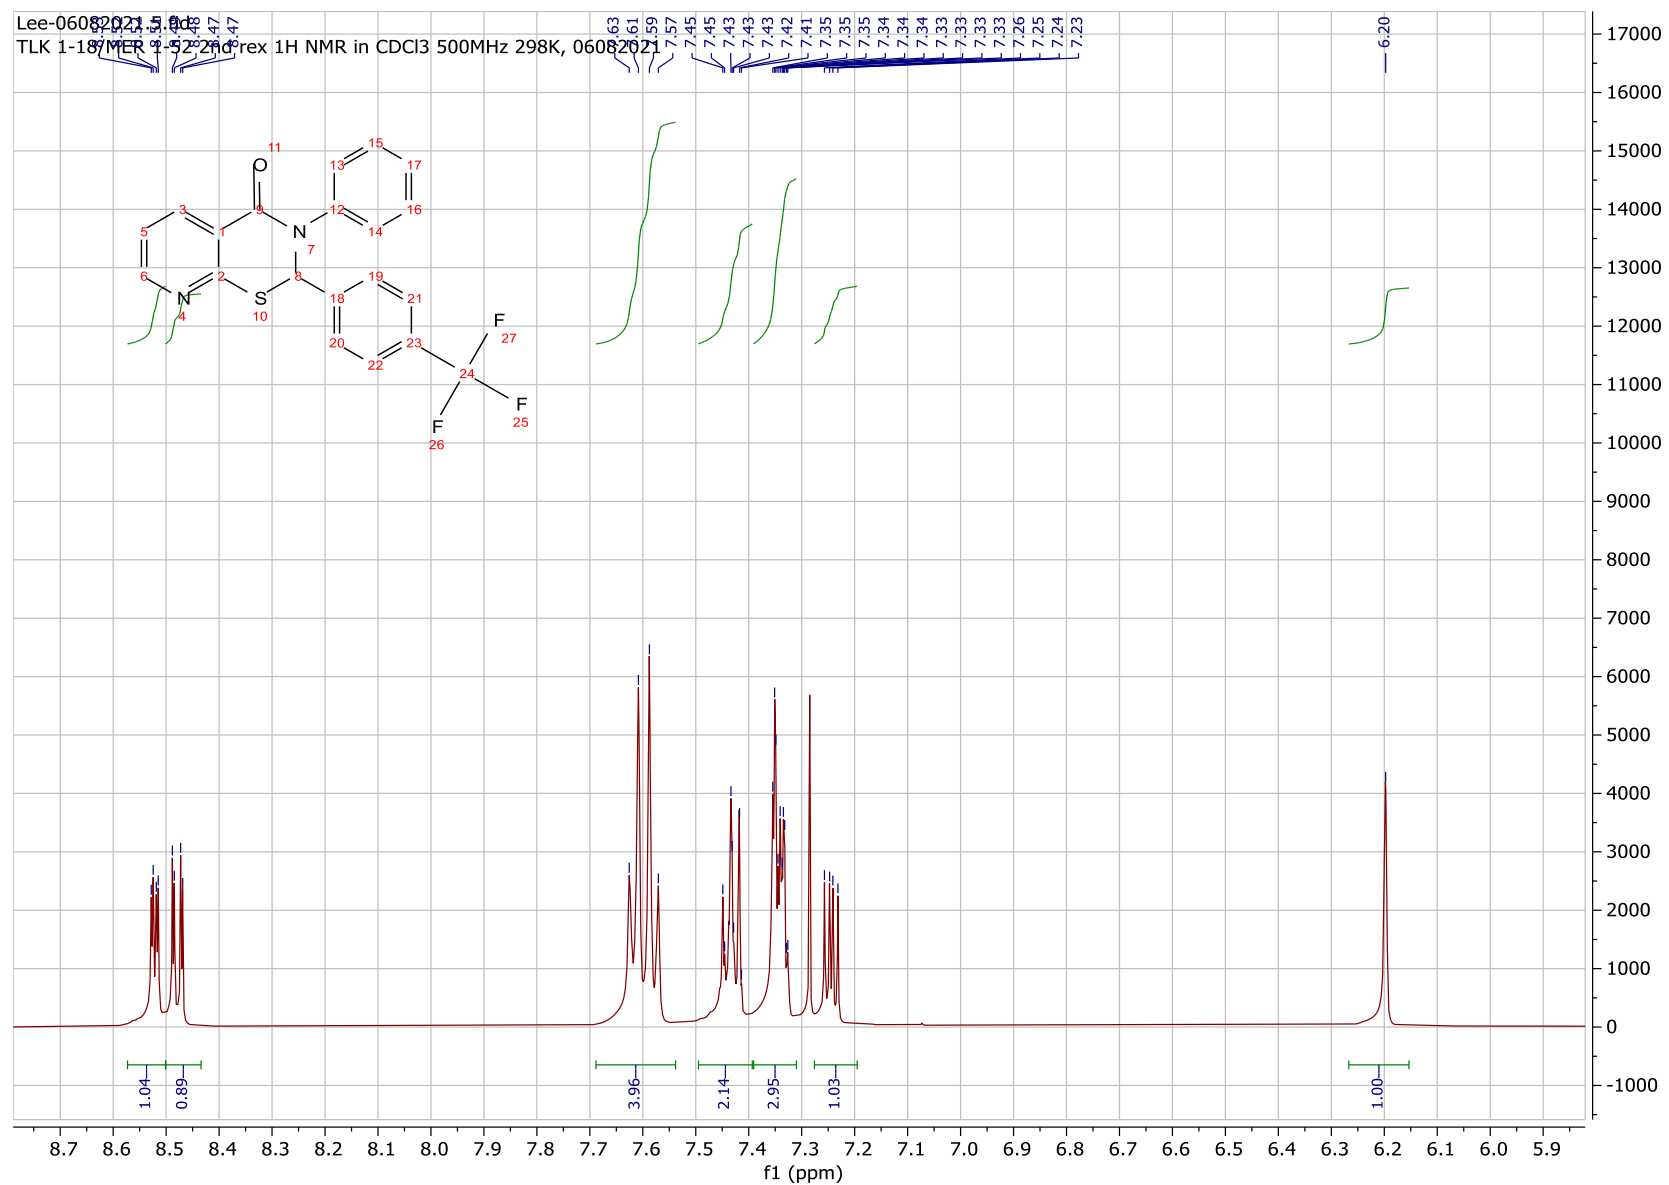

**Figure S5.**  $^1\text{H}$  NMR spectrum of compound **1e** ( $m\text{-CF}_3$ ).

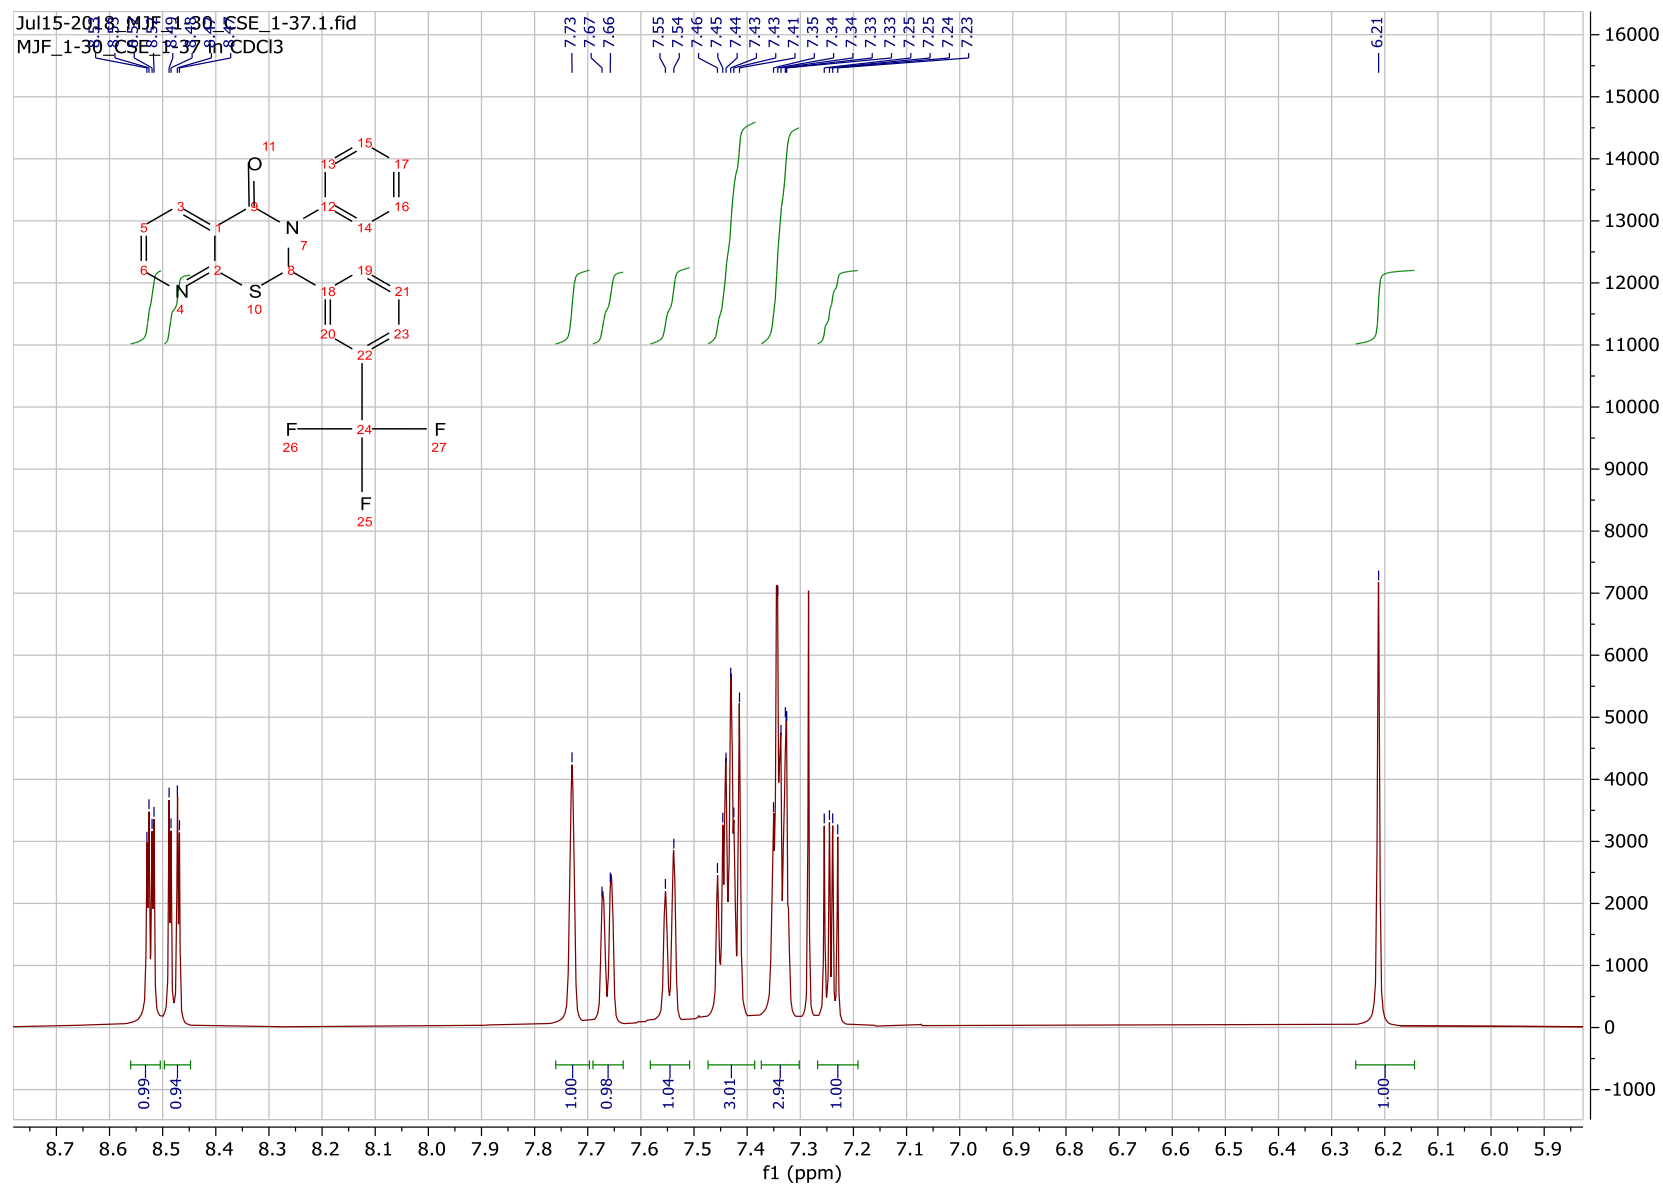

**Figure S6.**  $^1\text{H}$  NMR spectrum of compound **1f** (*p*-Br).

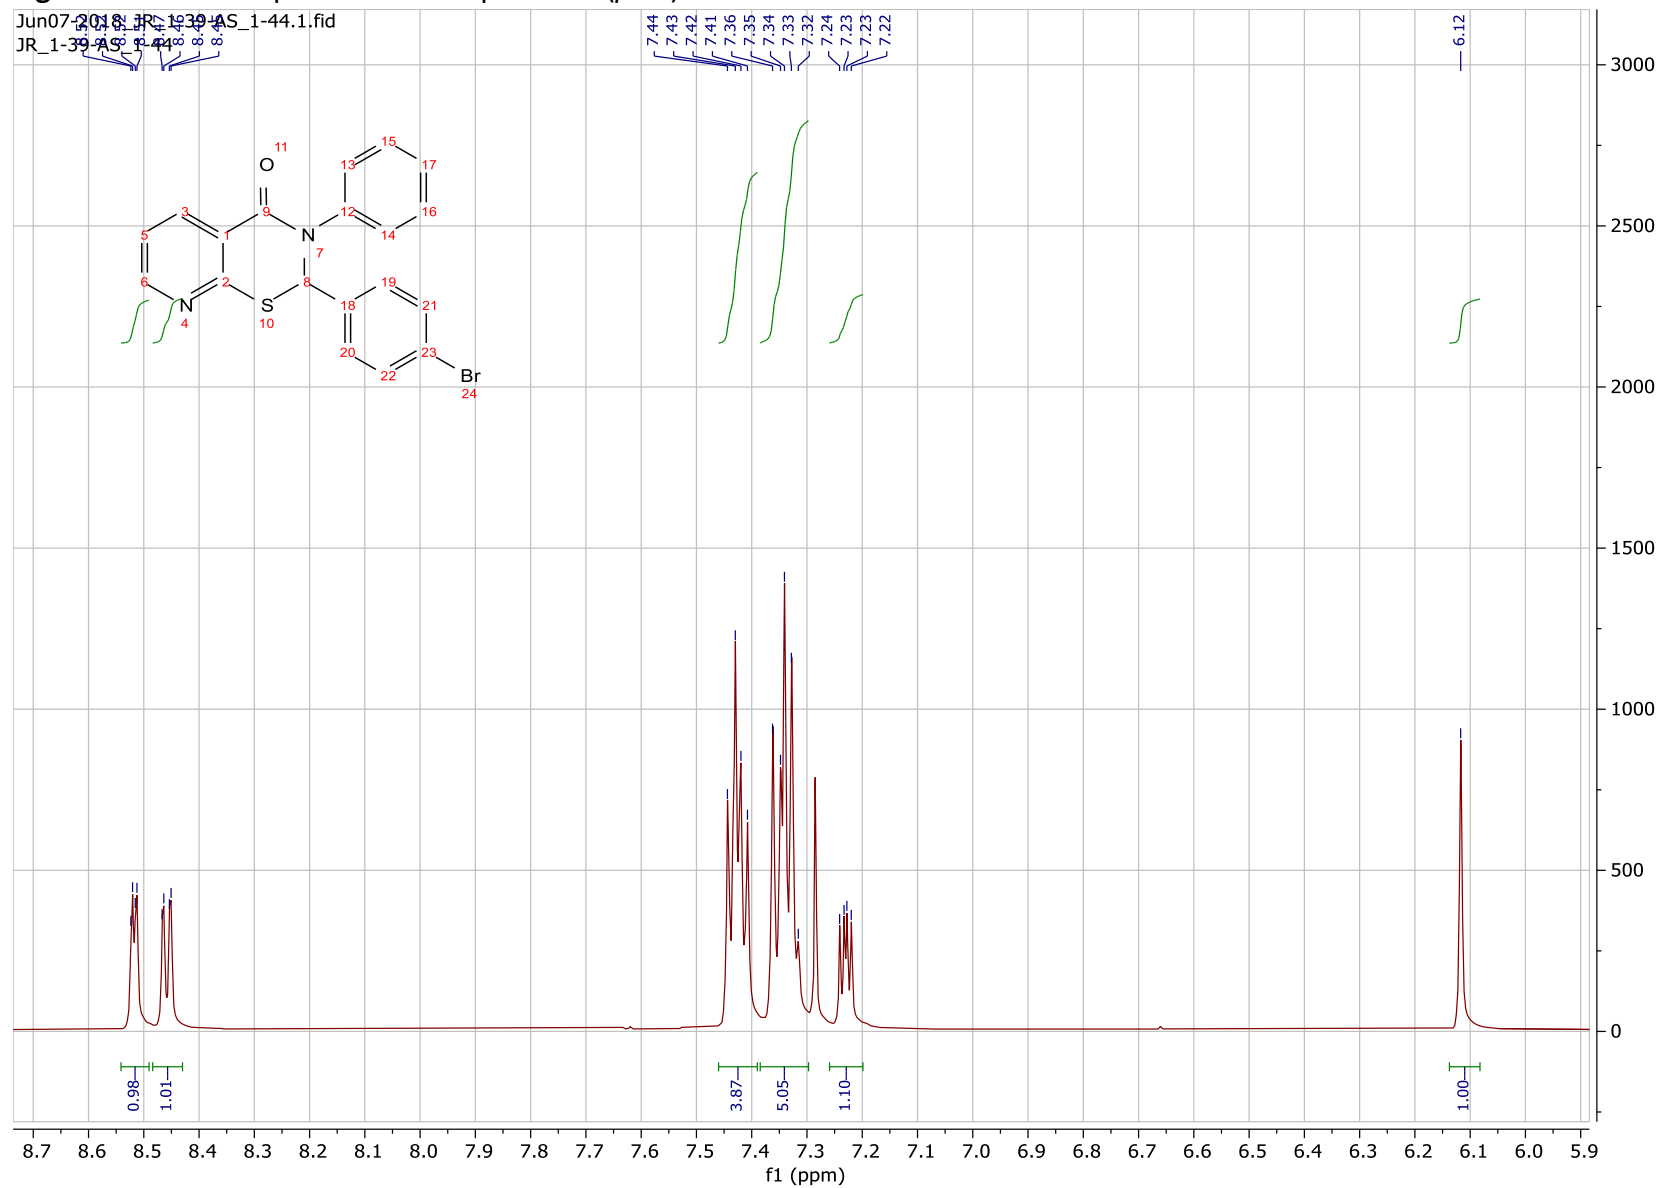

**Figure S7.**  $^1\text{H}$  NMR spectrum of compound **1g** (*m*-Br).

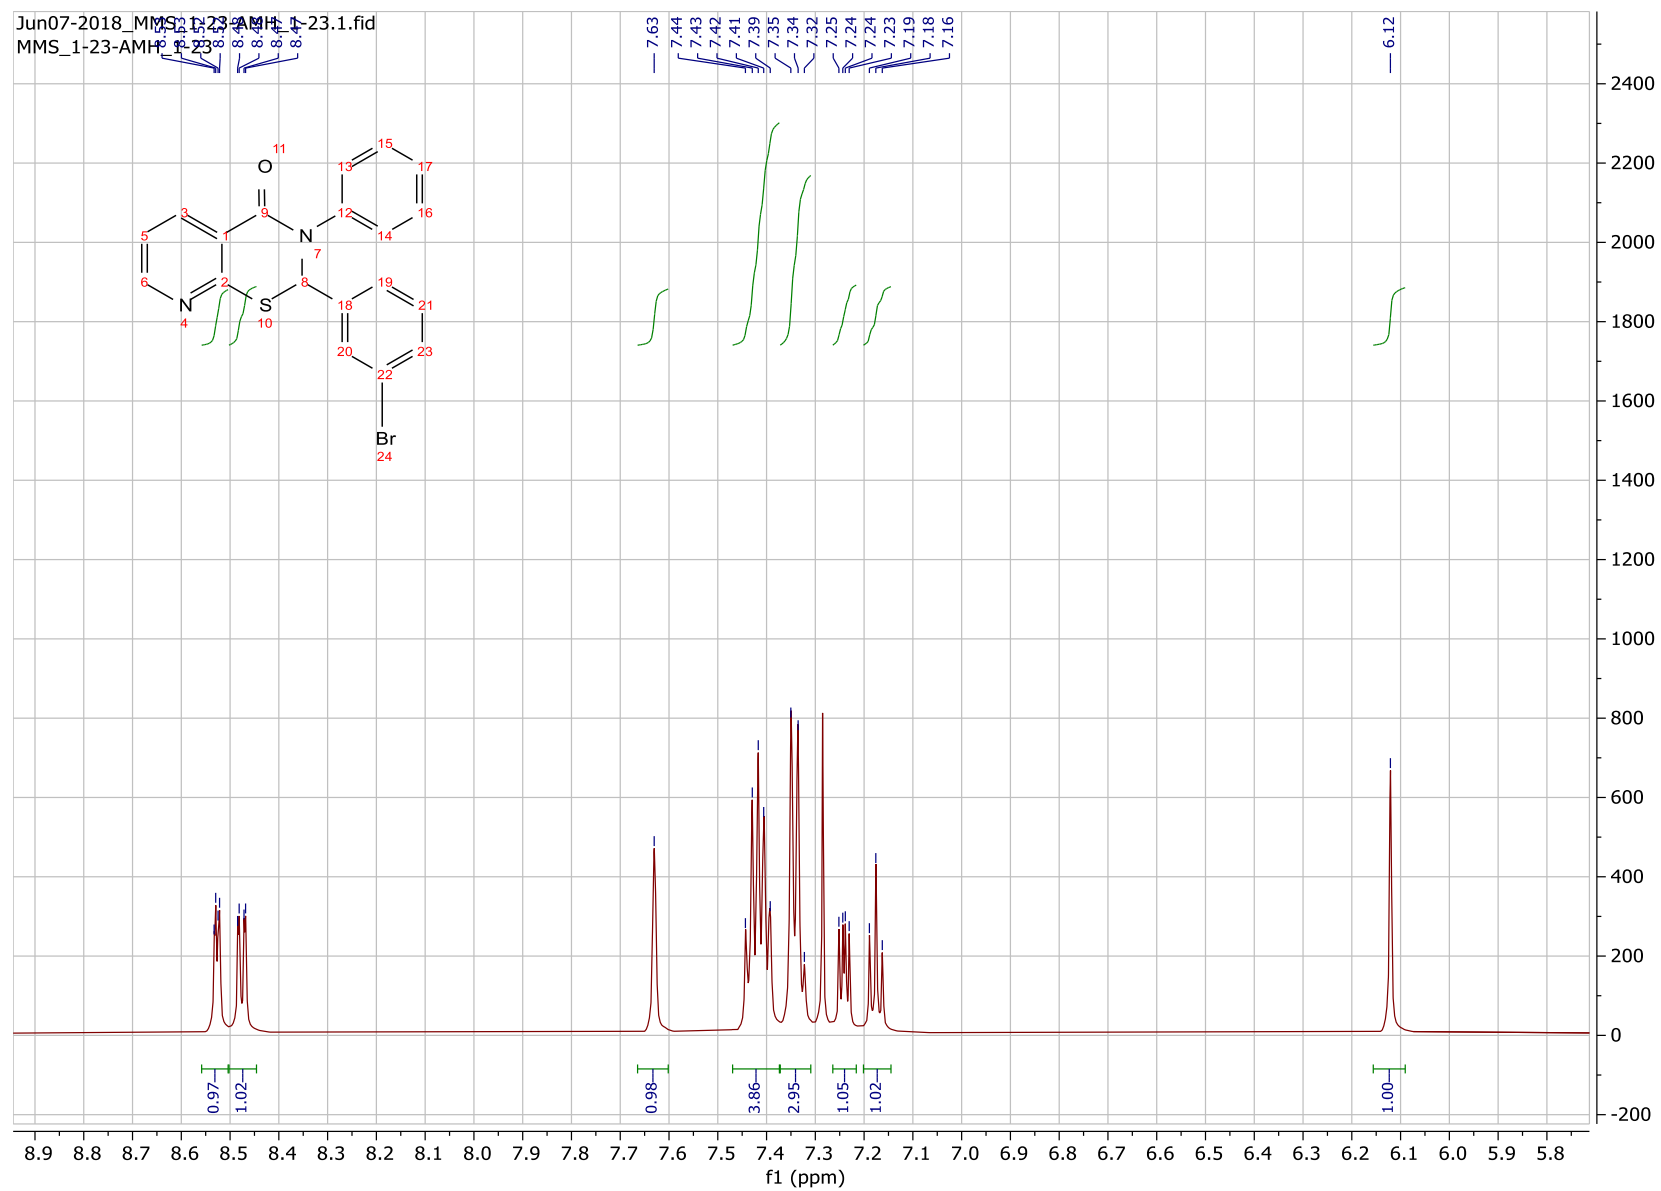

**Figure S8.**  $^1\text{H}$  NMR spectrum of compound **1h** (*p*-F).

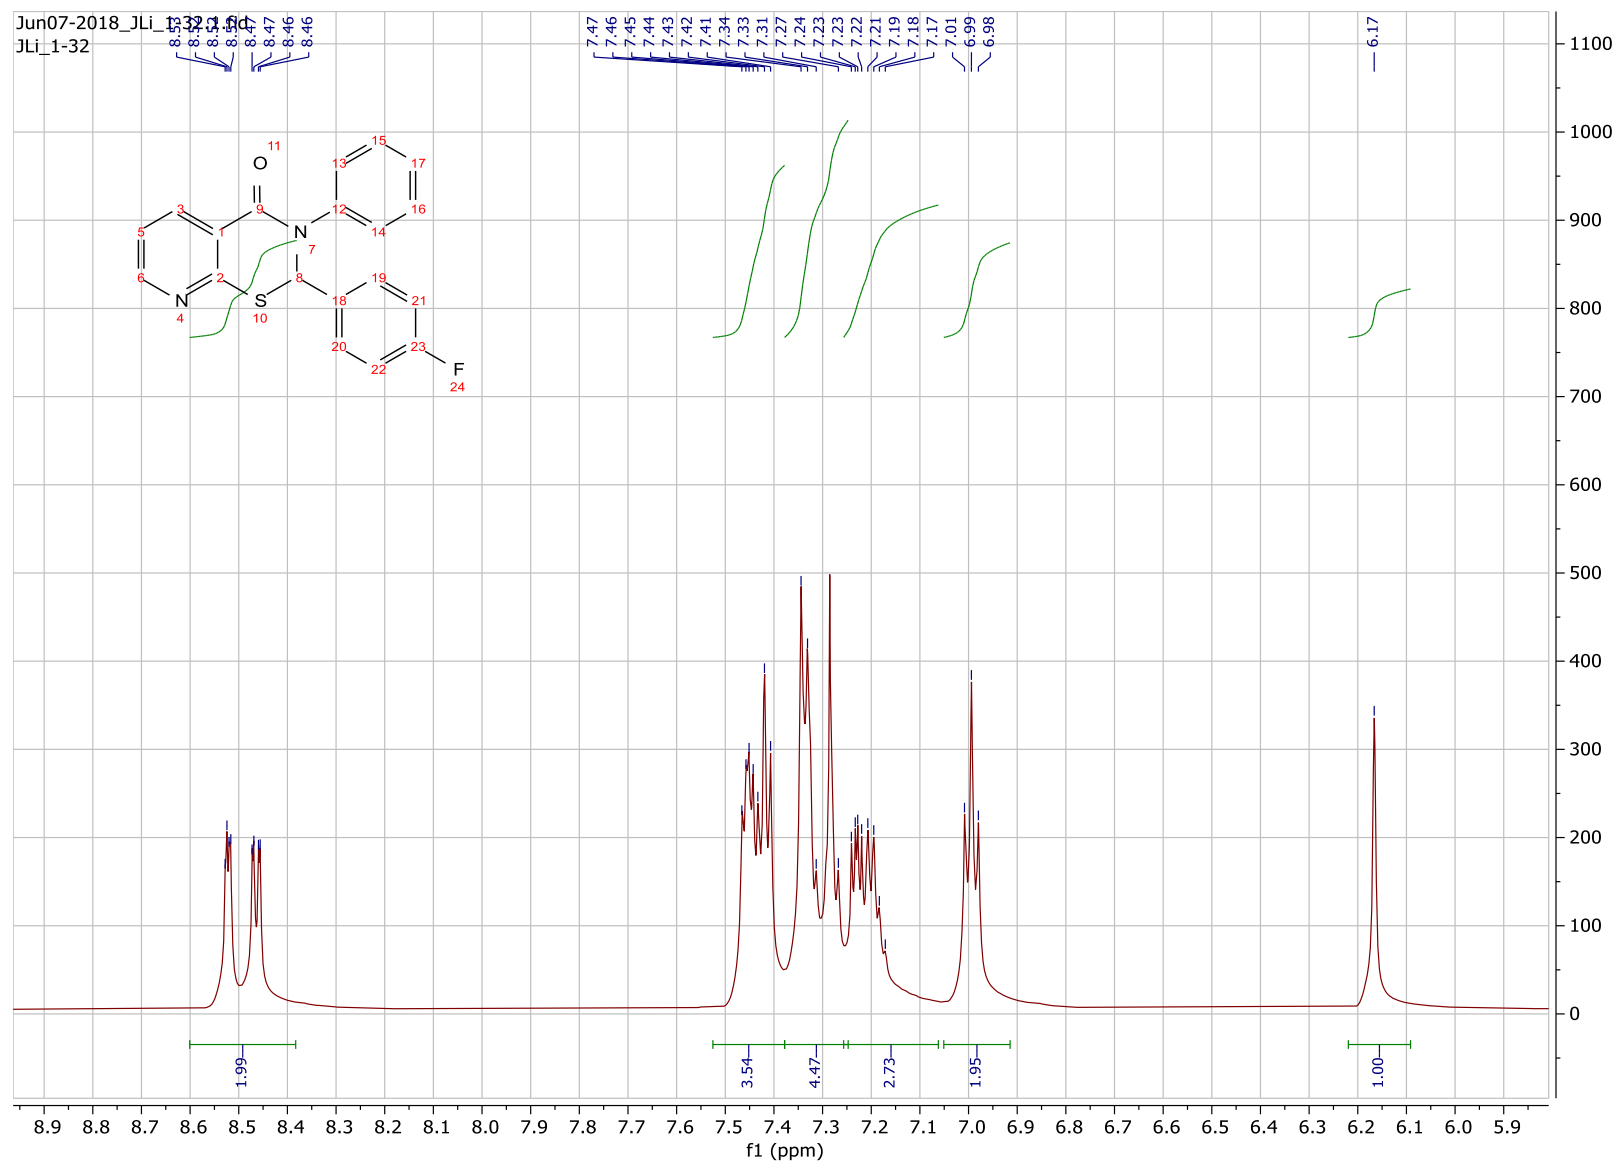

**Figure S9.**  $^1\text{H}$  NMR spectrum of compound **1i** (*m*-F).

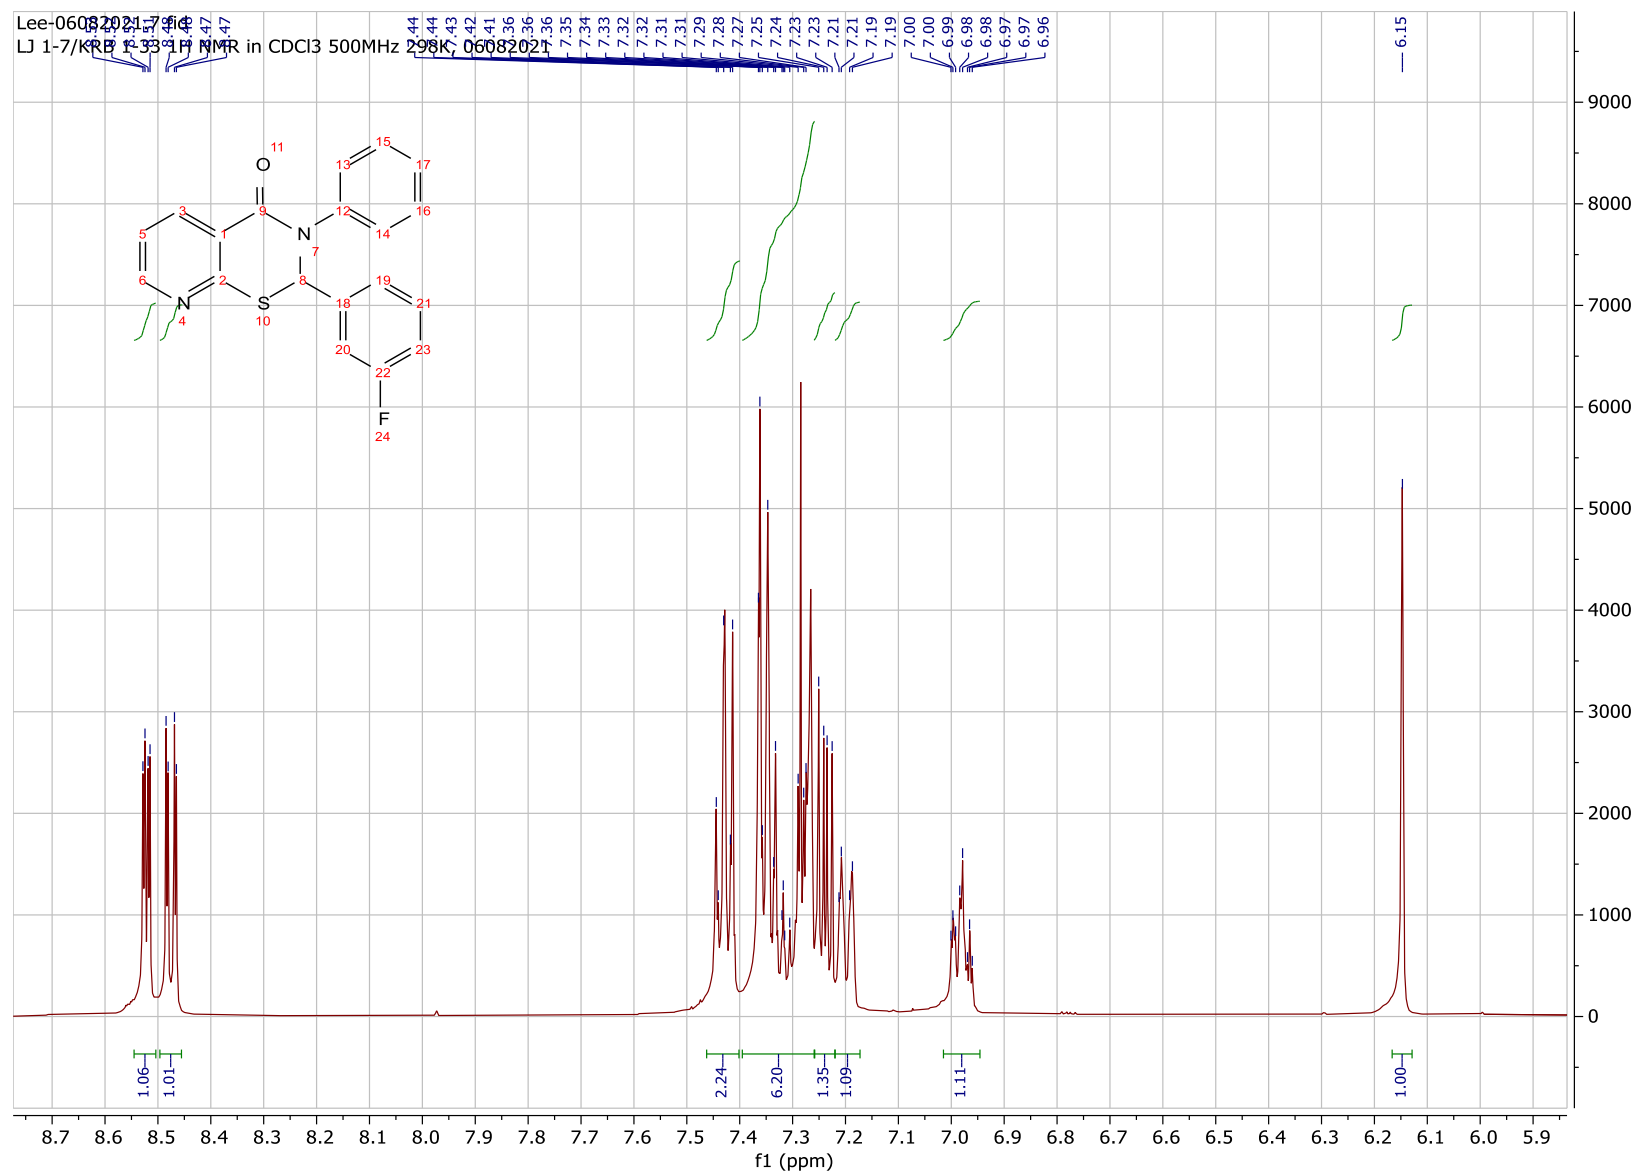

Figure S10.  $^1\text{H}$  NMR spectrum of compound **1k** (*p*-Me).

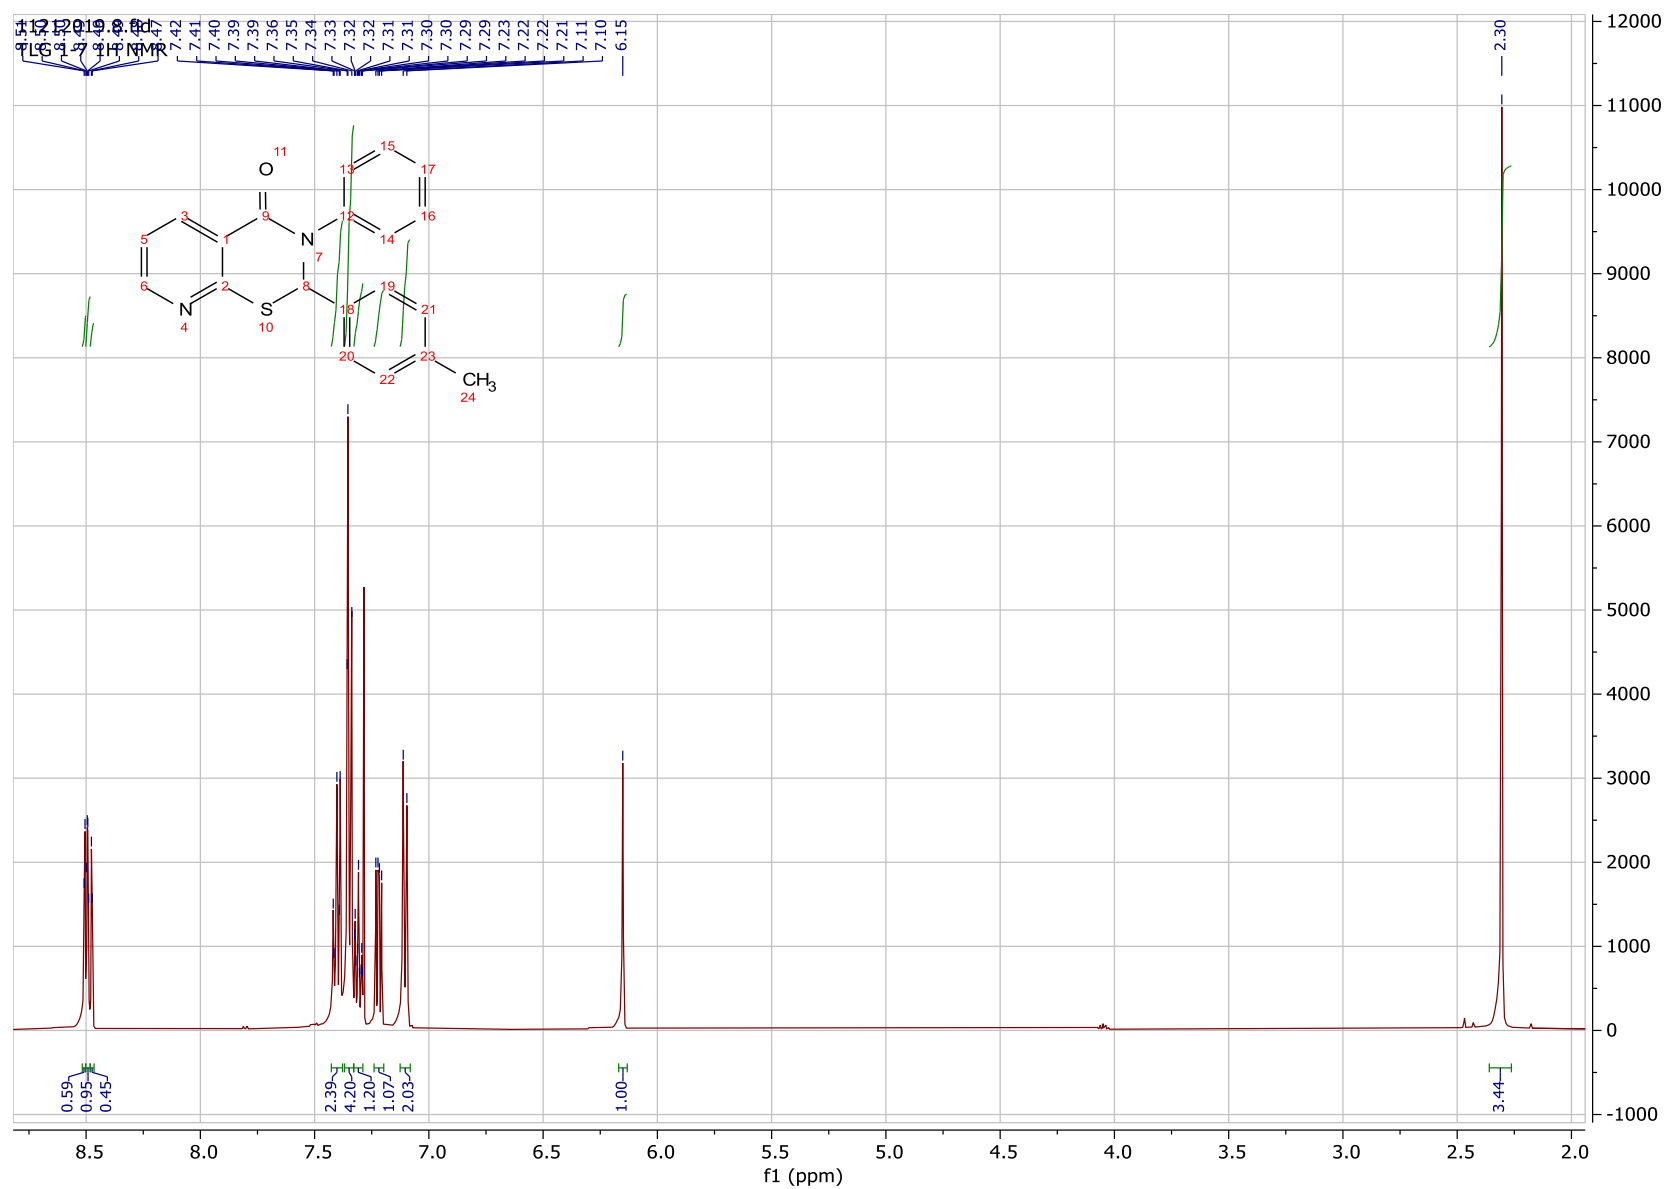

**Figure S11.**  $^1\text{H}$  NMR spectrum of compound **1l** (*m*-Me).

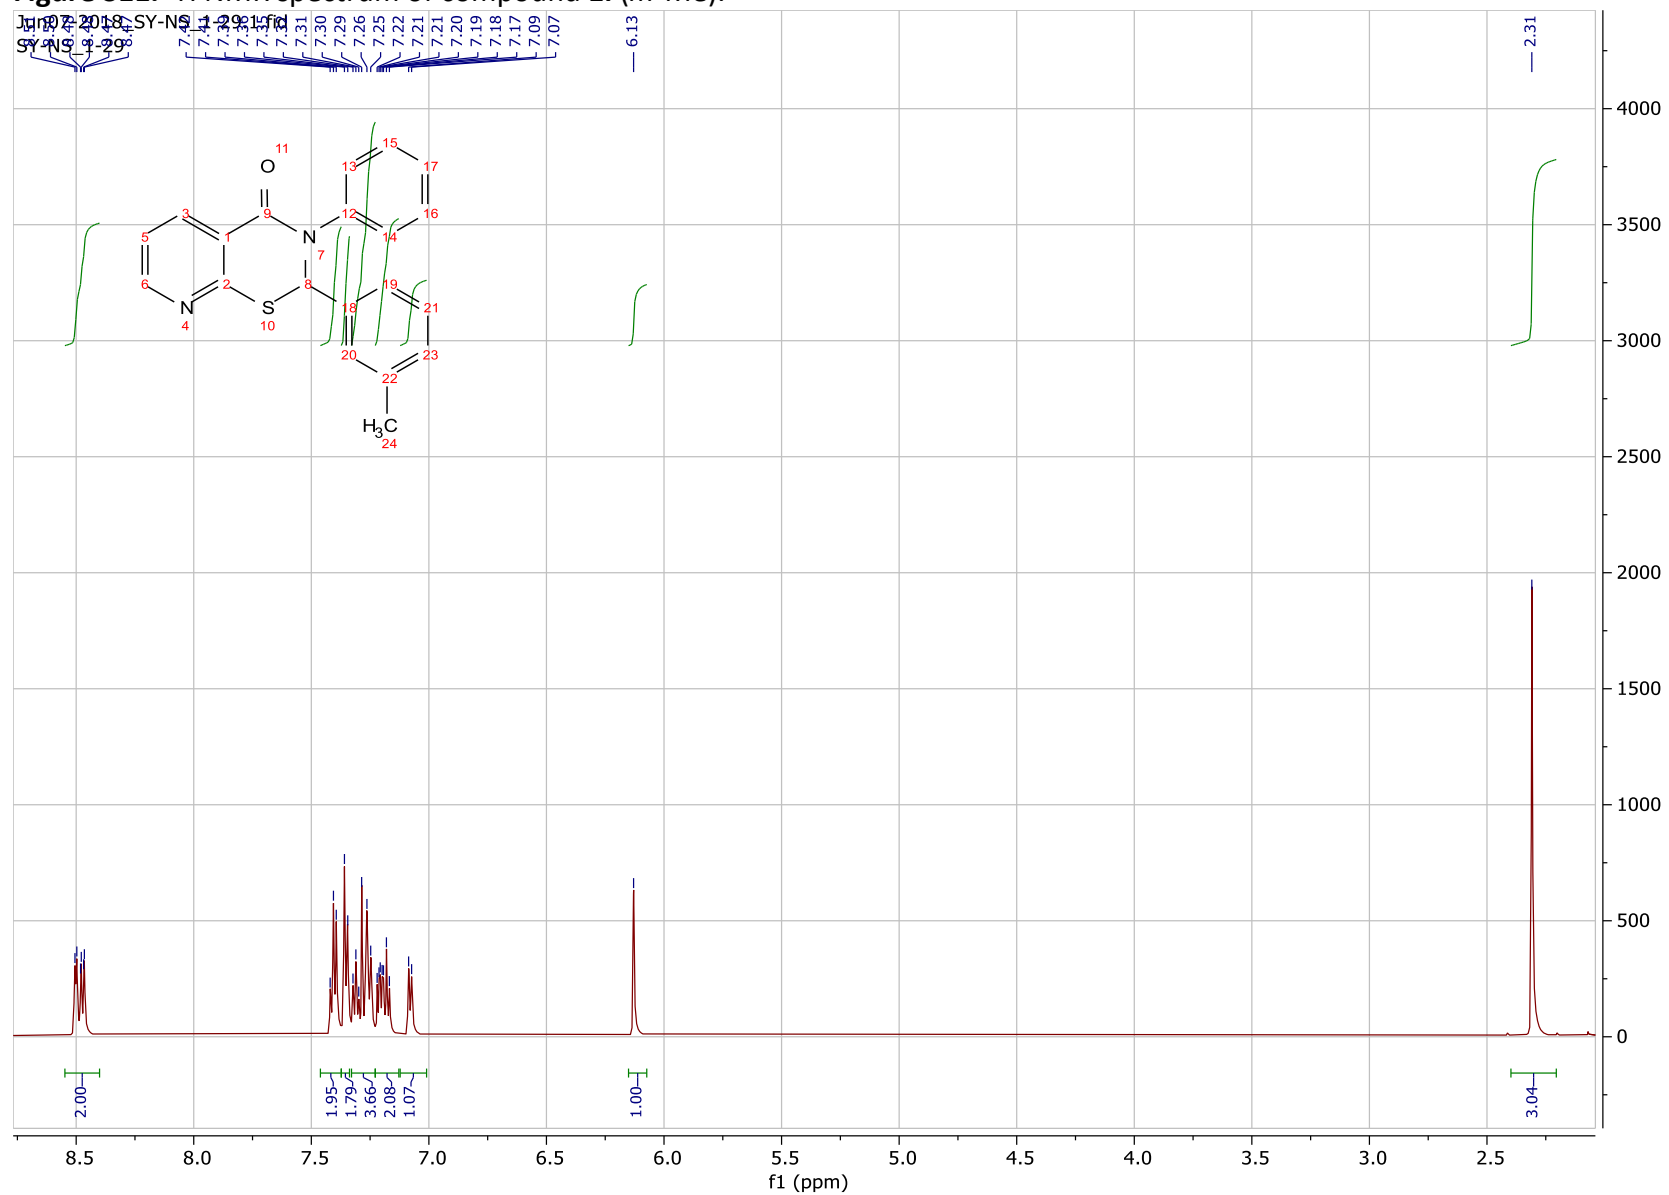

**Figure S12.**  $^1\text{H}$  NMR spectrum of compound **1m** (*p*-OMe).

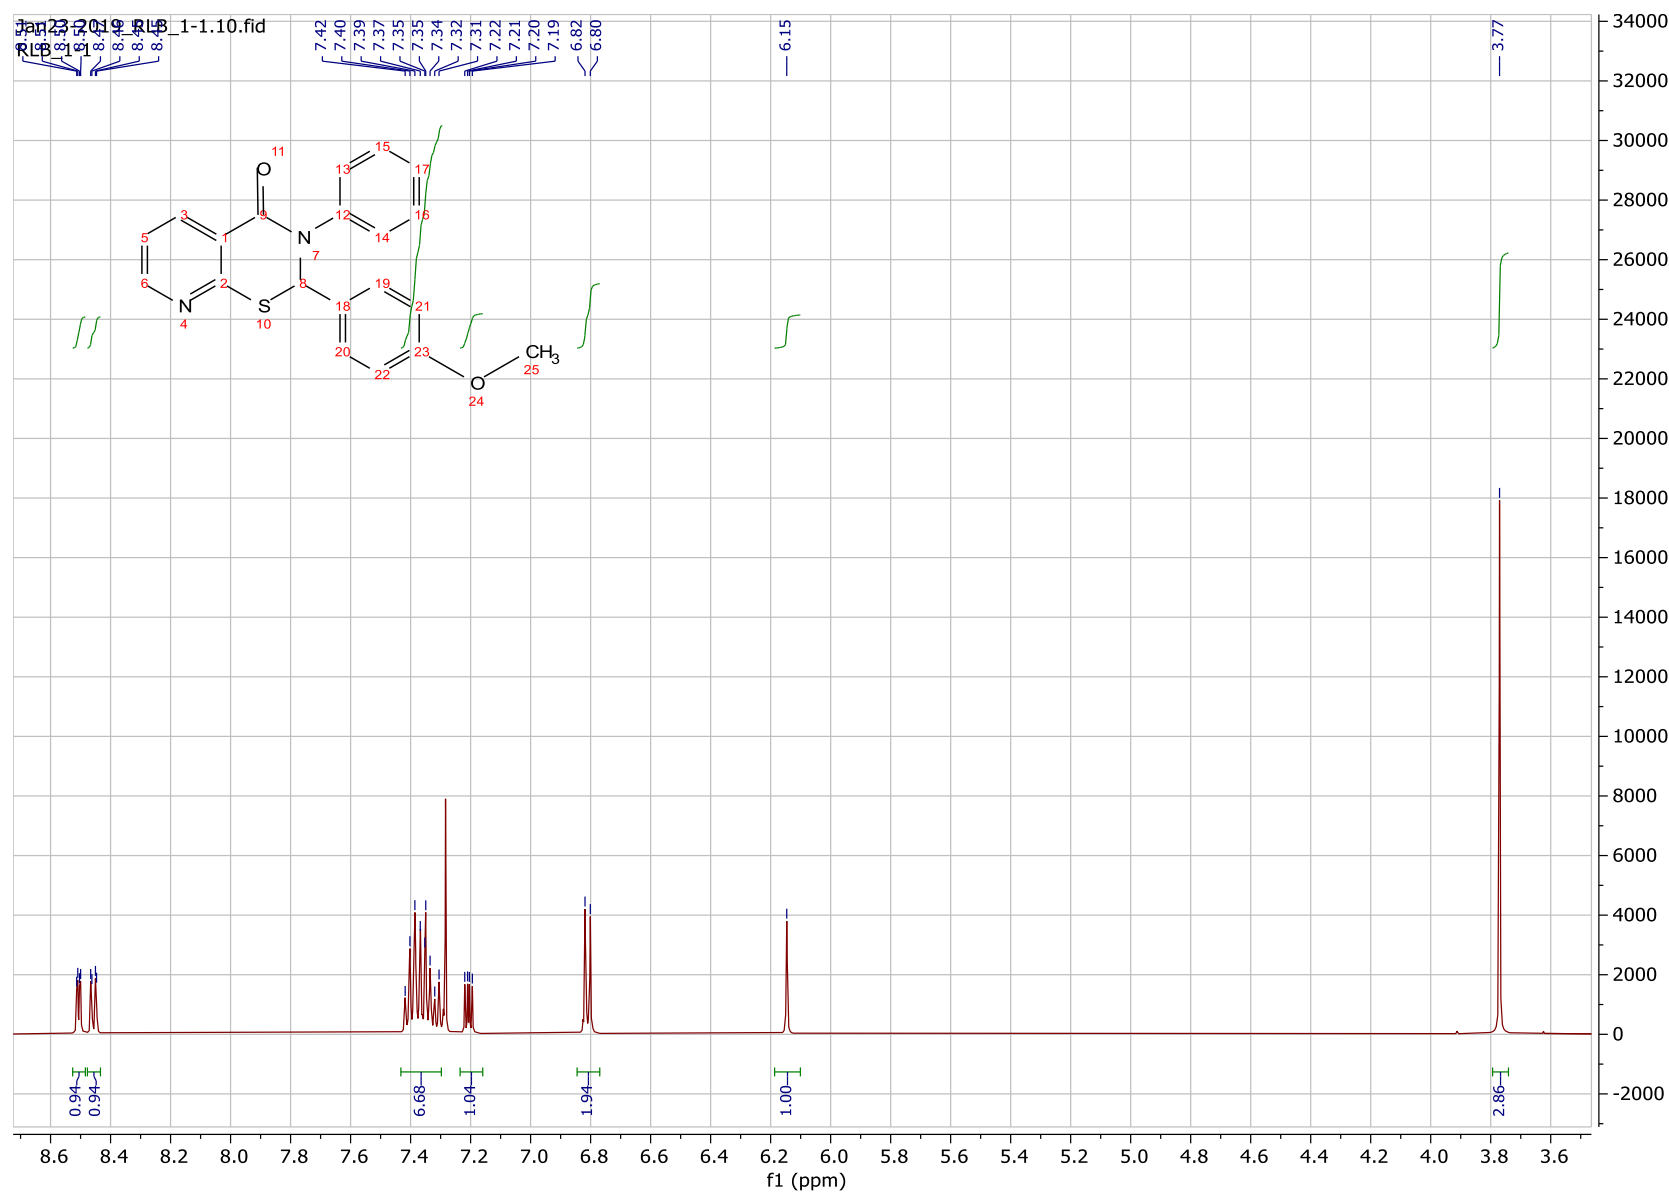

**Figure S13.**  $^1\text{H}$  NMR spectrum of compound **1n** (*m*-OMe).

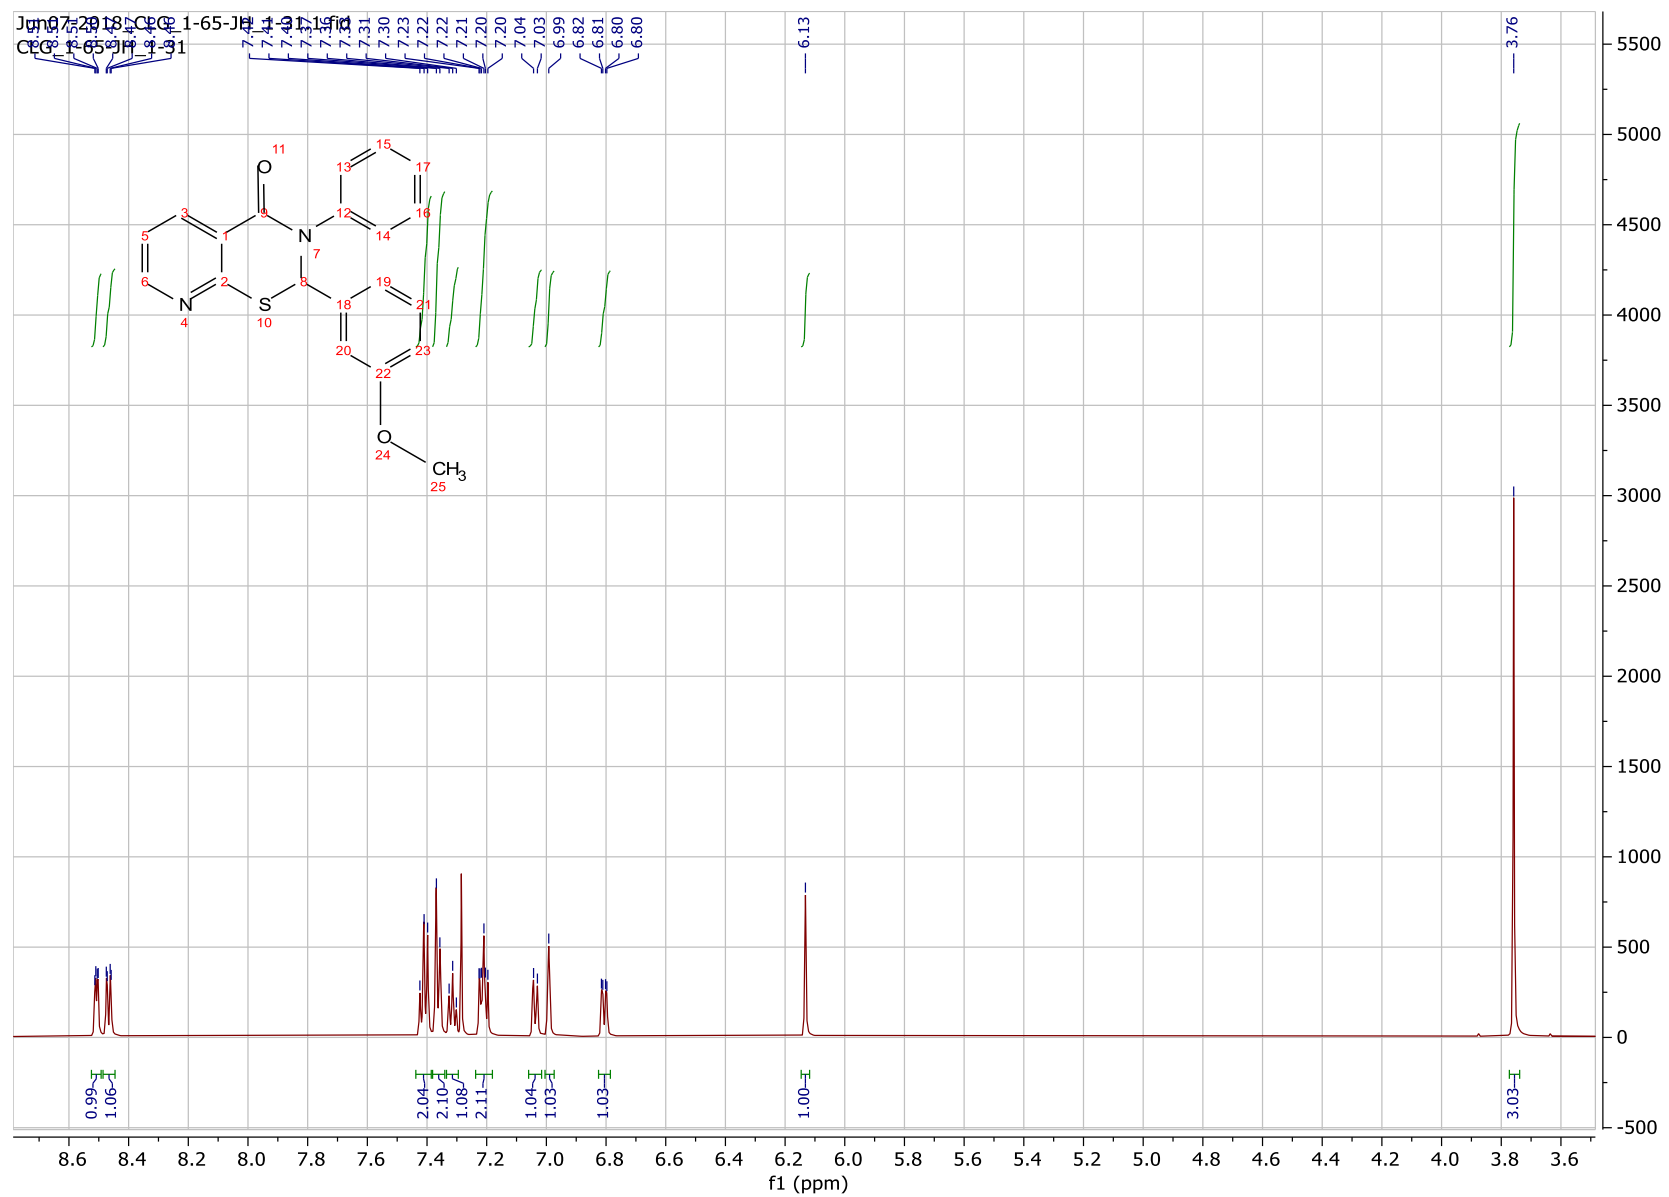

**Figure S14.**  $^{13}\text{C}$  NMR spectrum of compound **1a** (*p*-NO<sub>2</sub>).

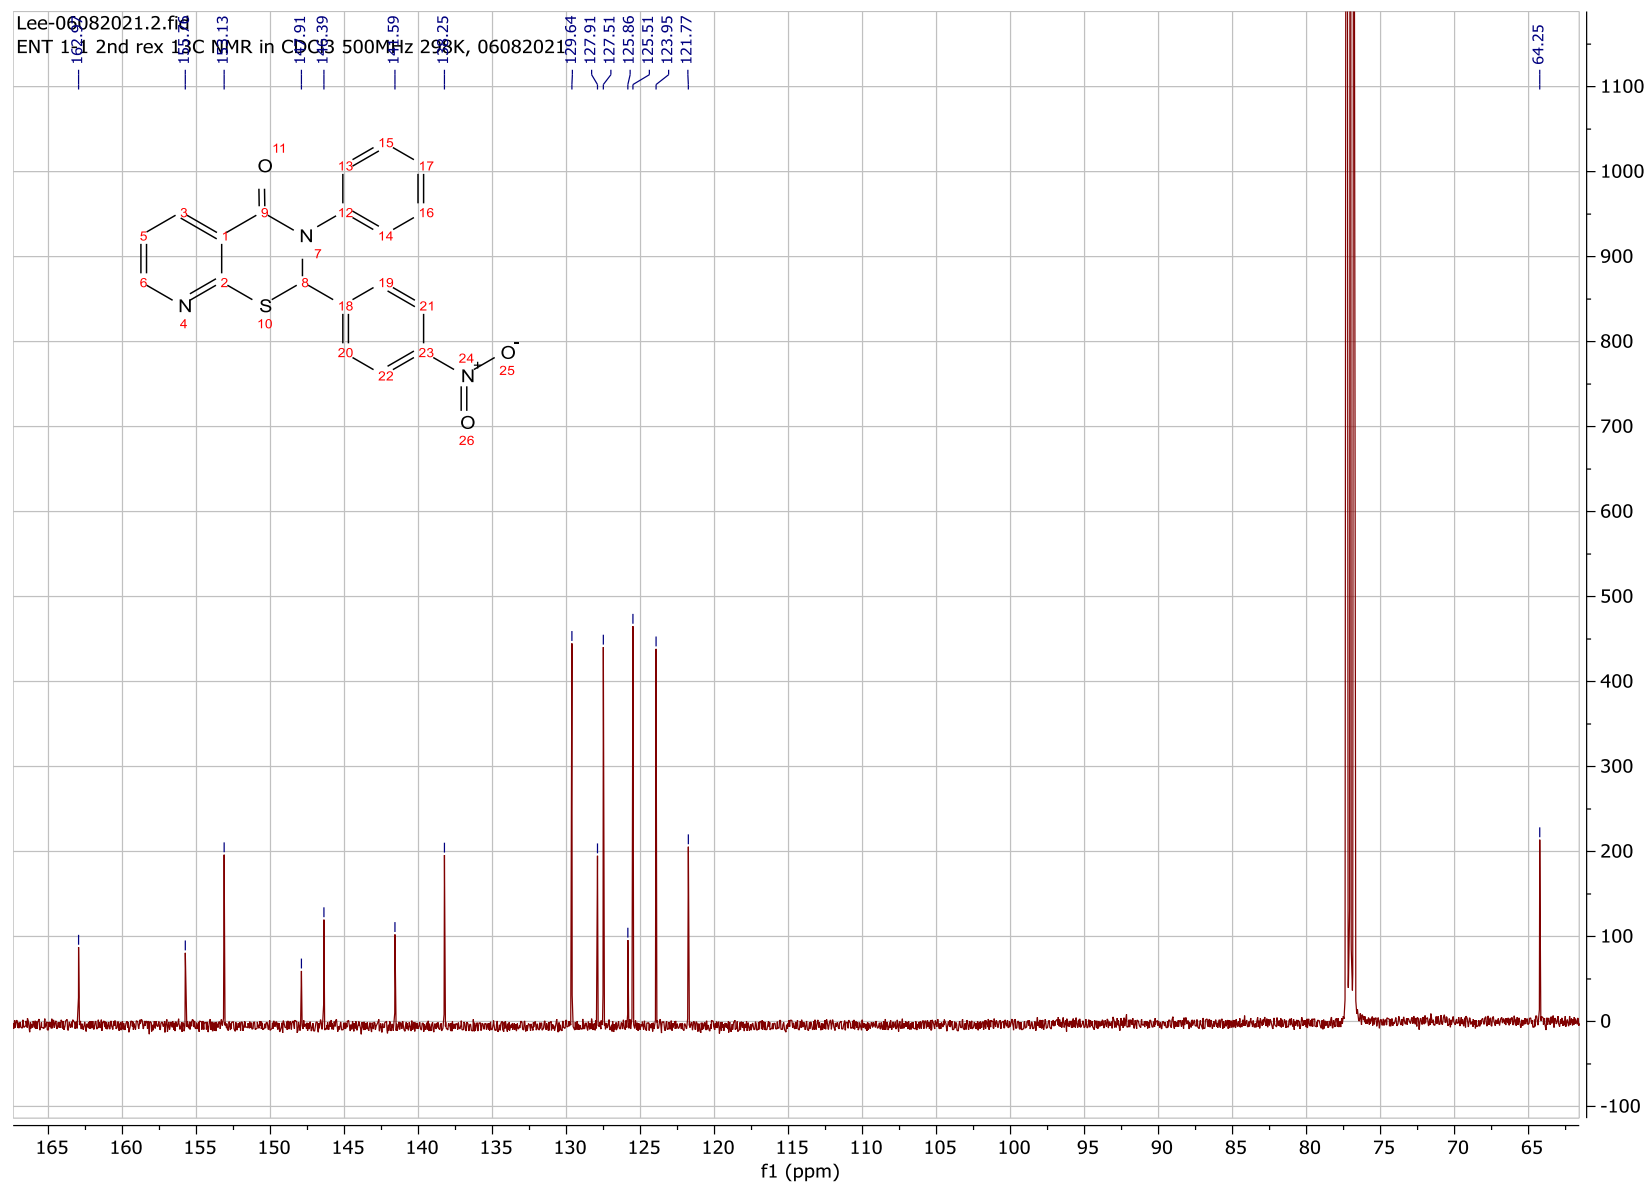

**Figure S15.**  $^{13}\text{C}$  NMR spectrum of compound **1b** (*m*-NO<sub>2</sub>).

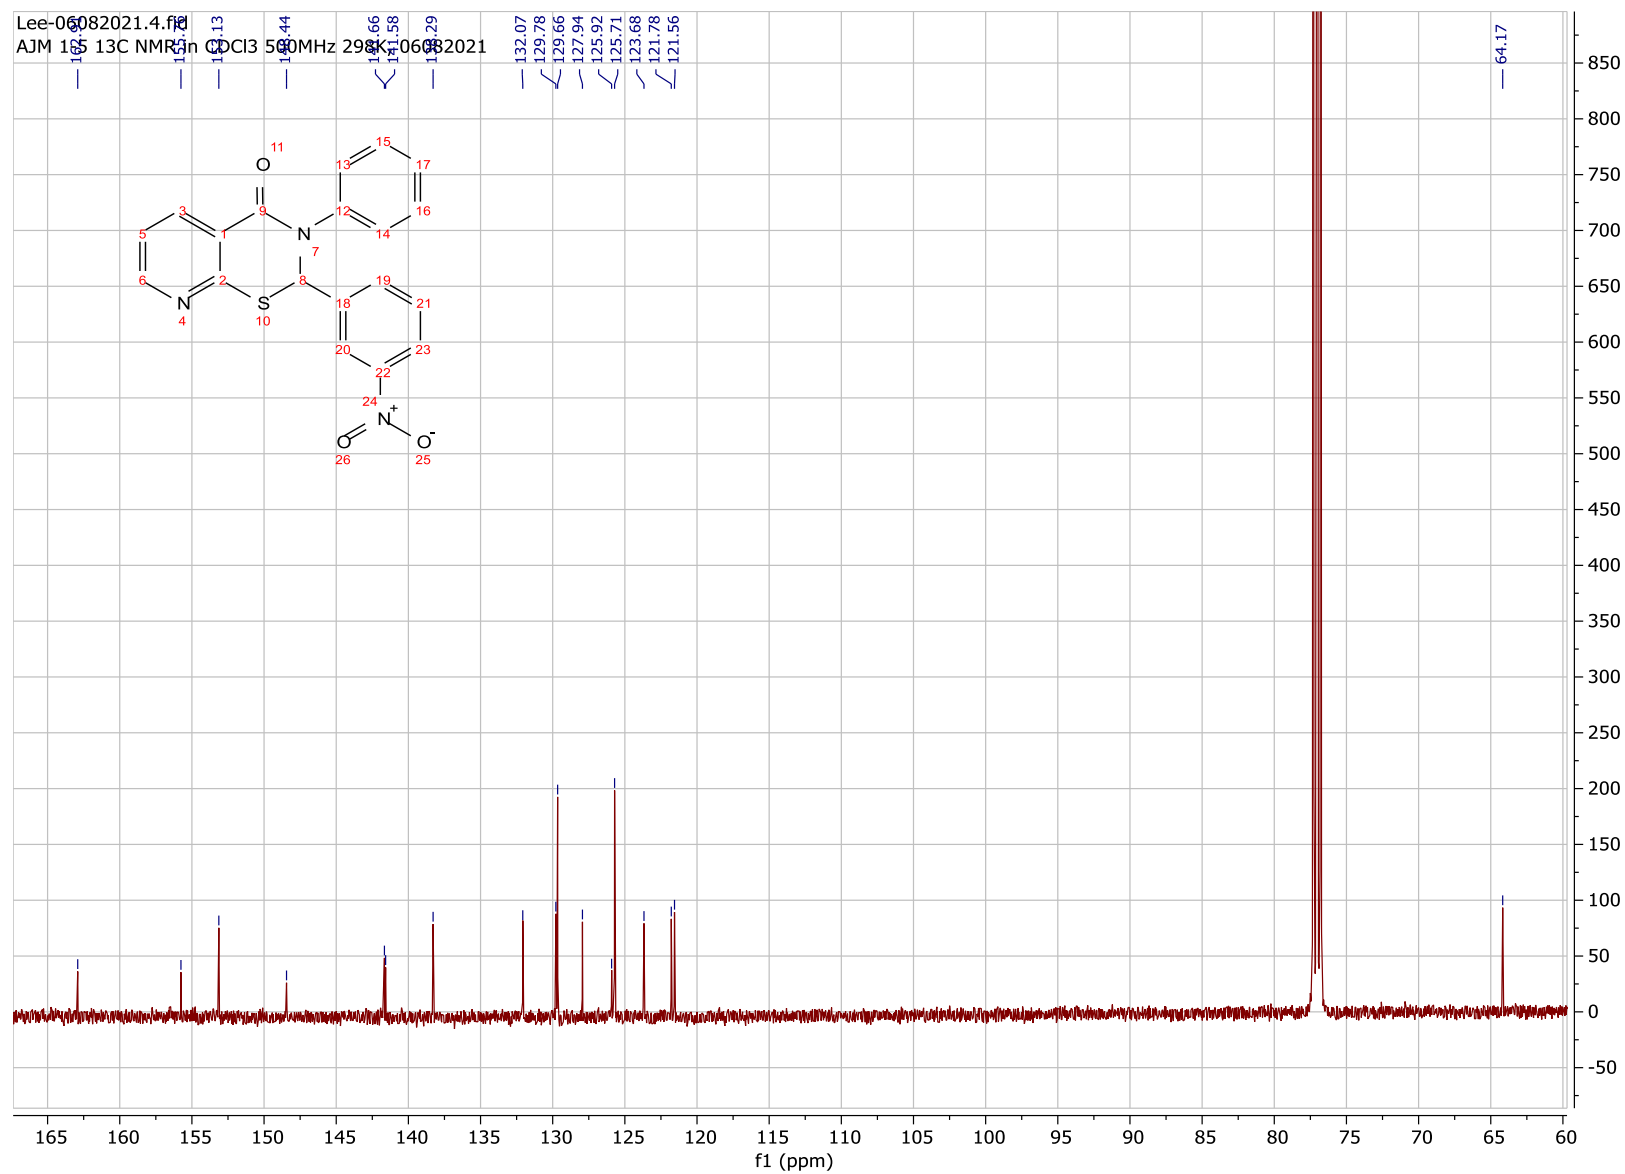

**Figure S16.**  $^{13}\text{C}$  NMR spectrum of compound **1c** (*o*-NO<sub>2</sub>).

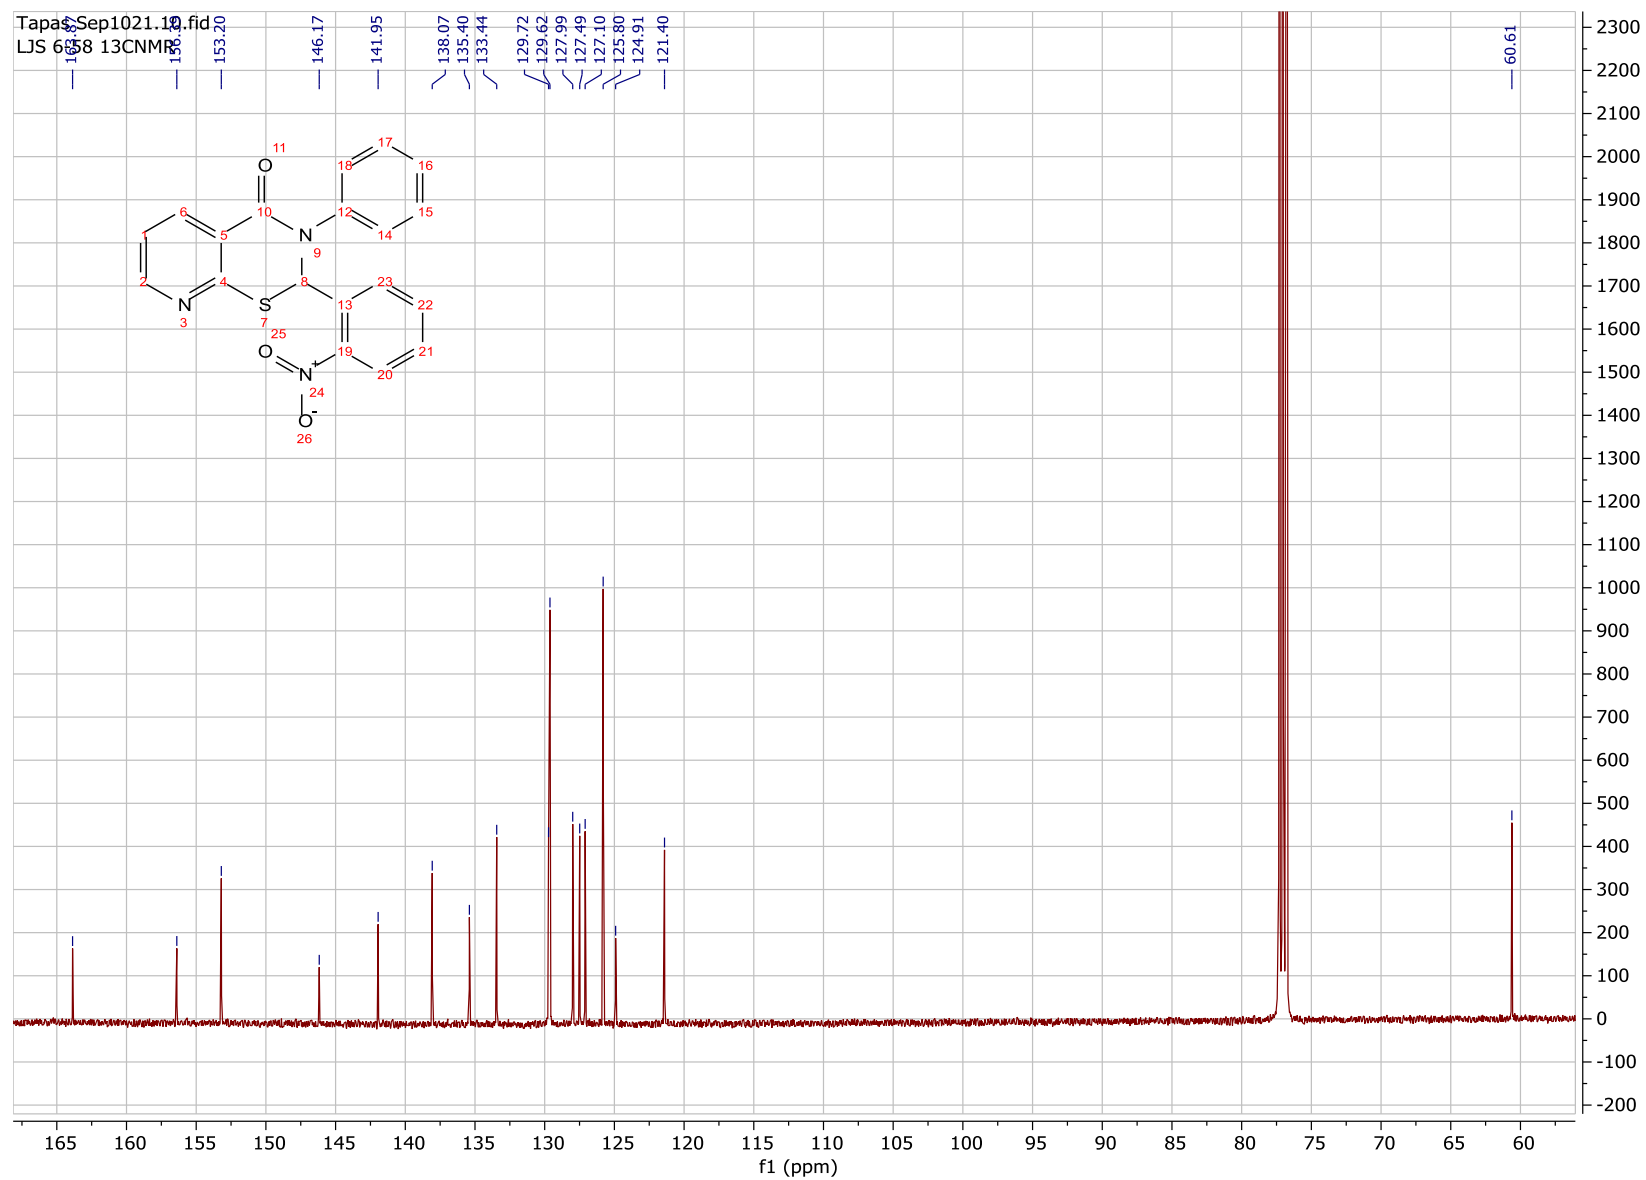

**Figure S17.**  $^{13}\text{C}$  NMR spectrum of compound **1d** ( $p\text{-CF}_3$ ).

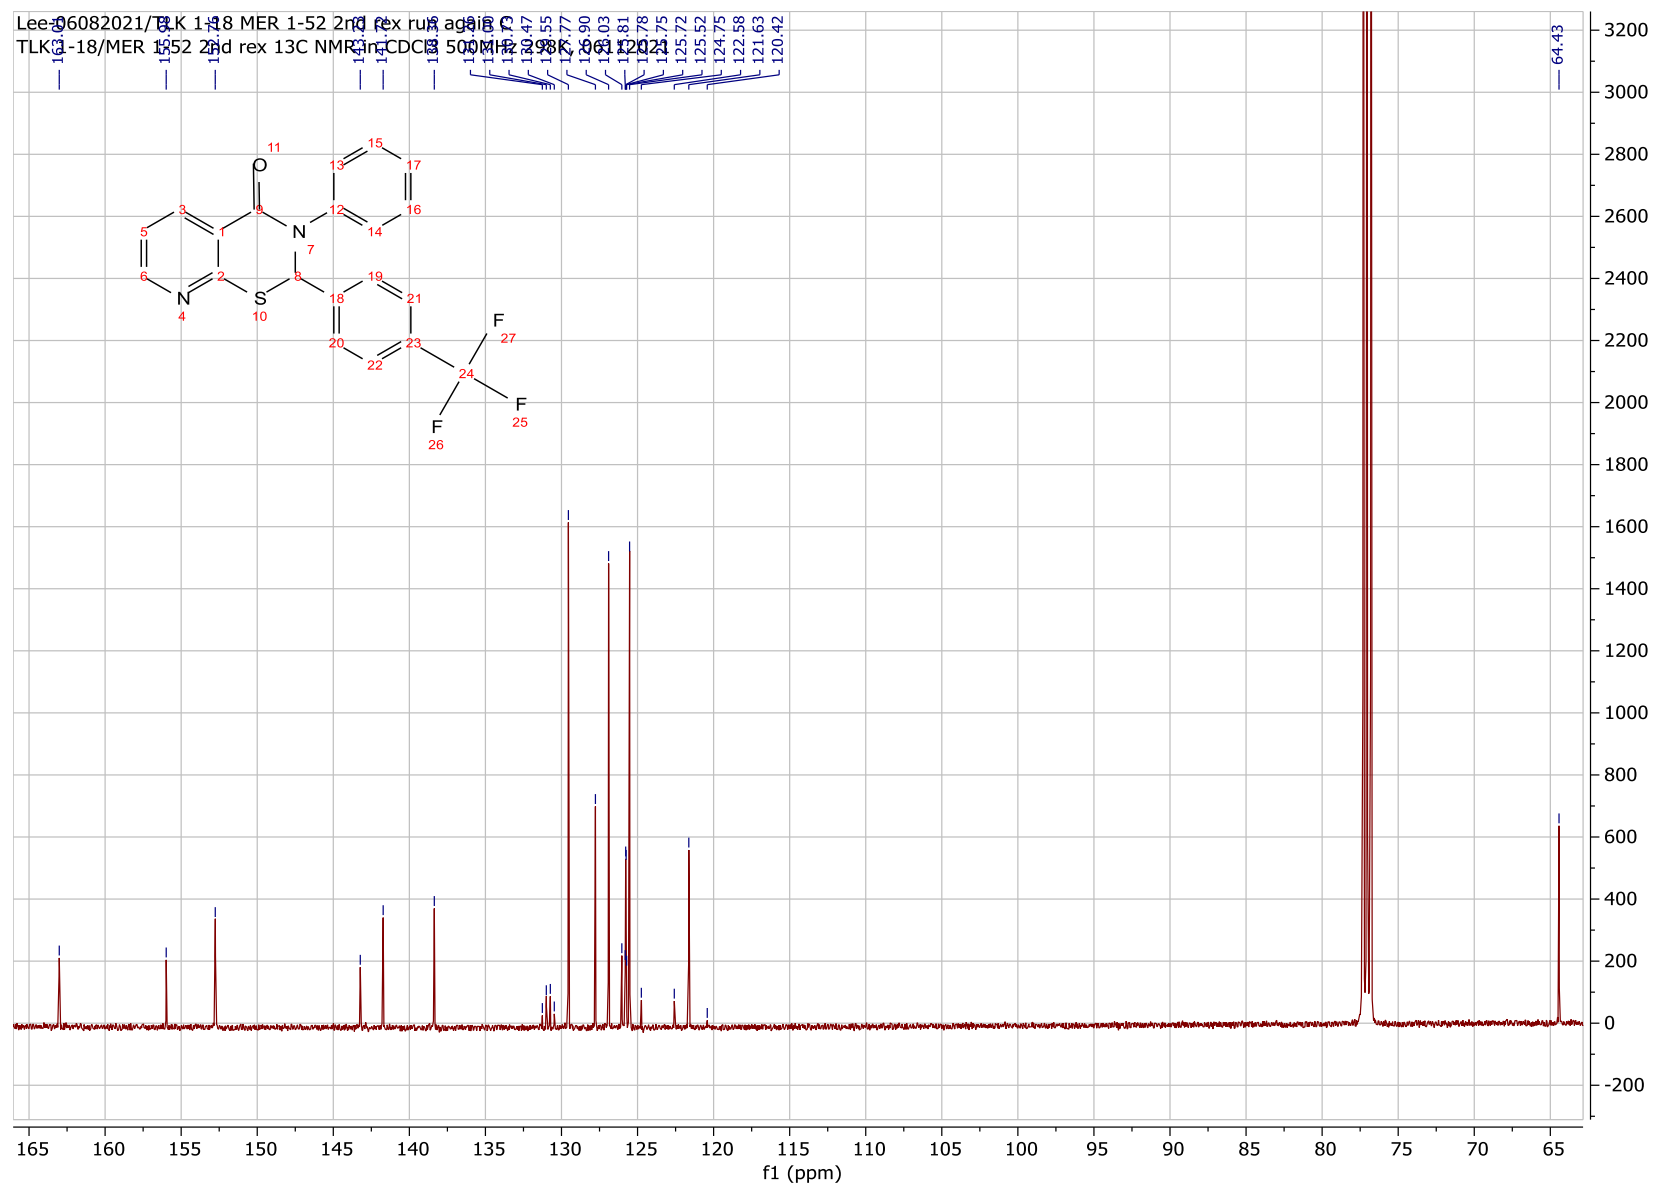

**Figure S18.**  $^{13}\text{C}$  NMR spectrum of compound **1e** (*m*-CF<sub>3</sub>).

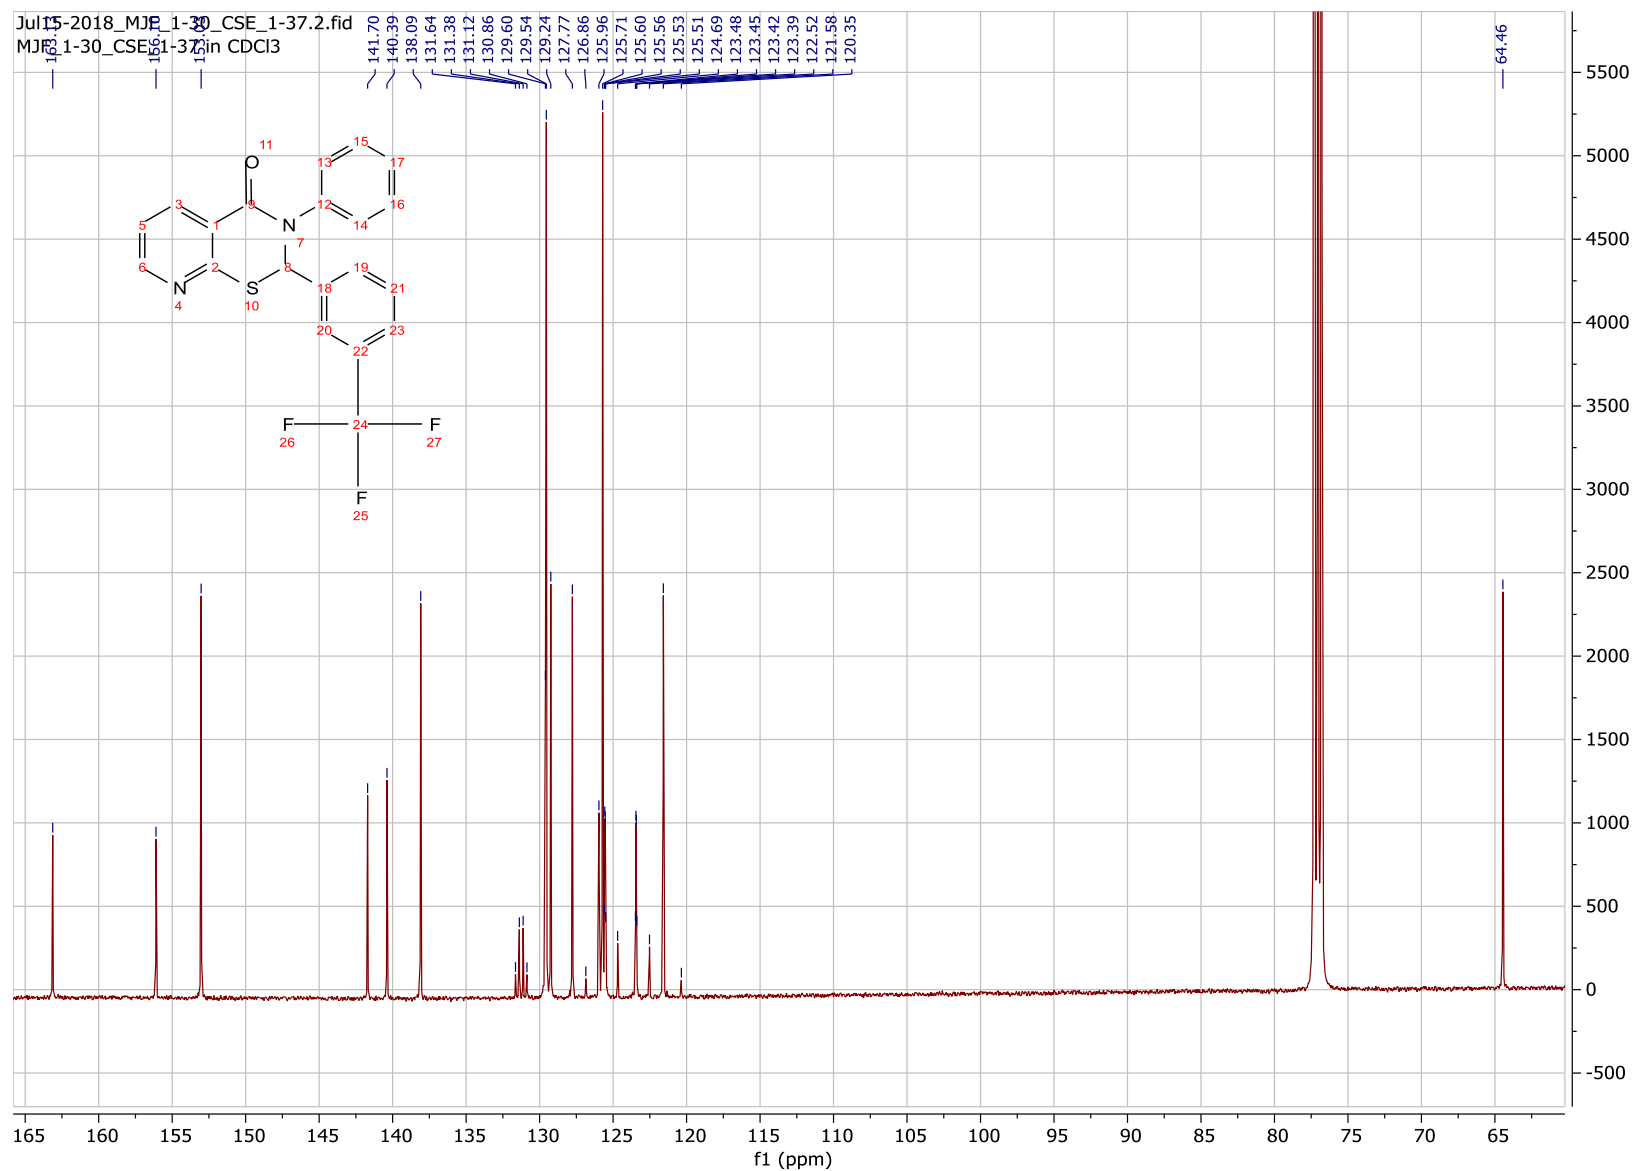

**Figure S19.**  $^{13}\text{C}$  NMR spectrum of compound **1f** (*p*-Br).

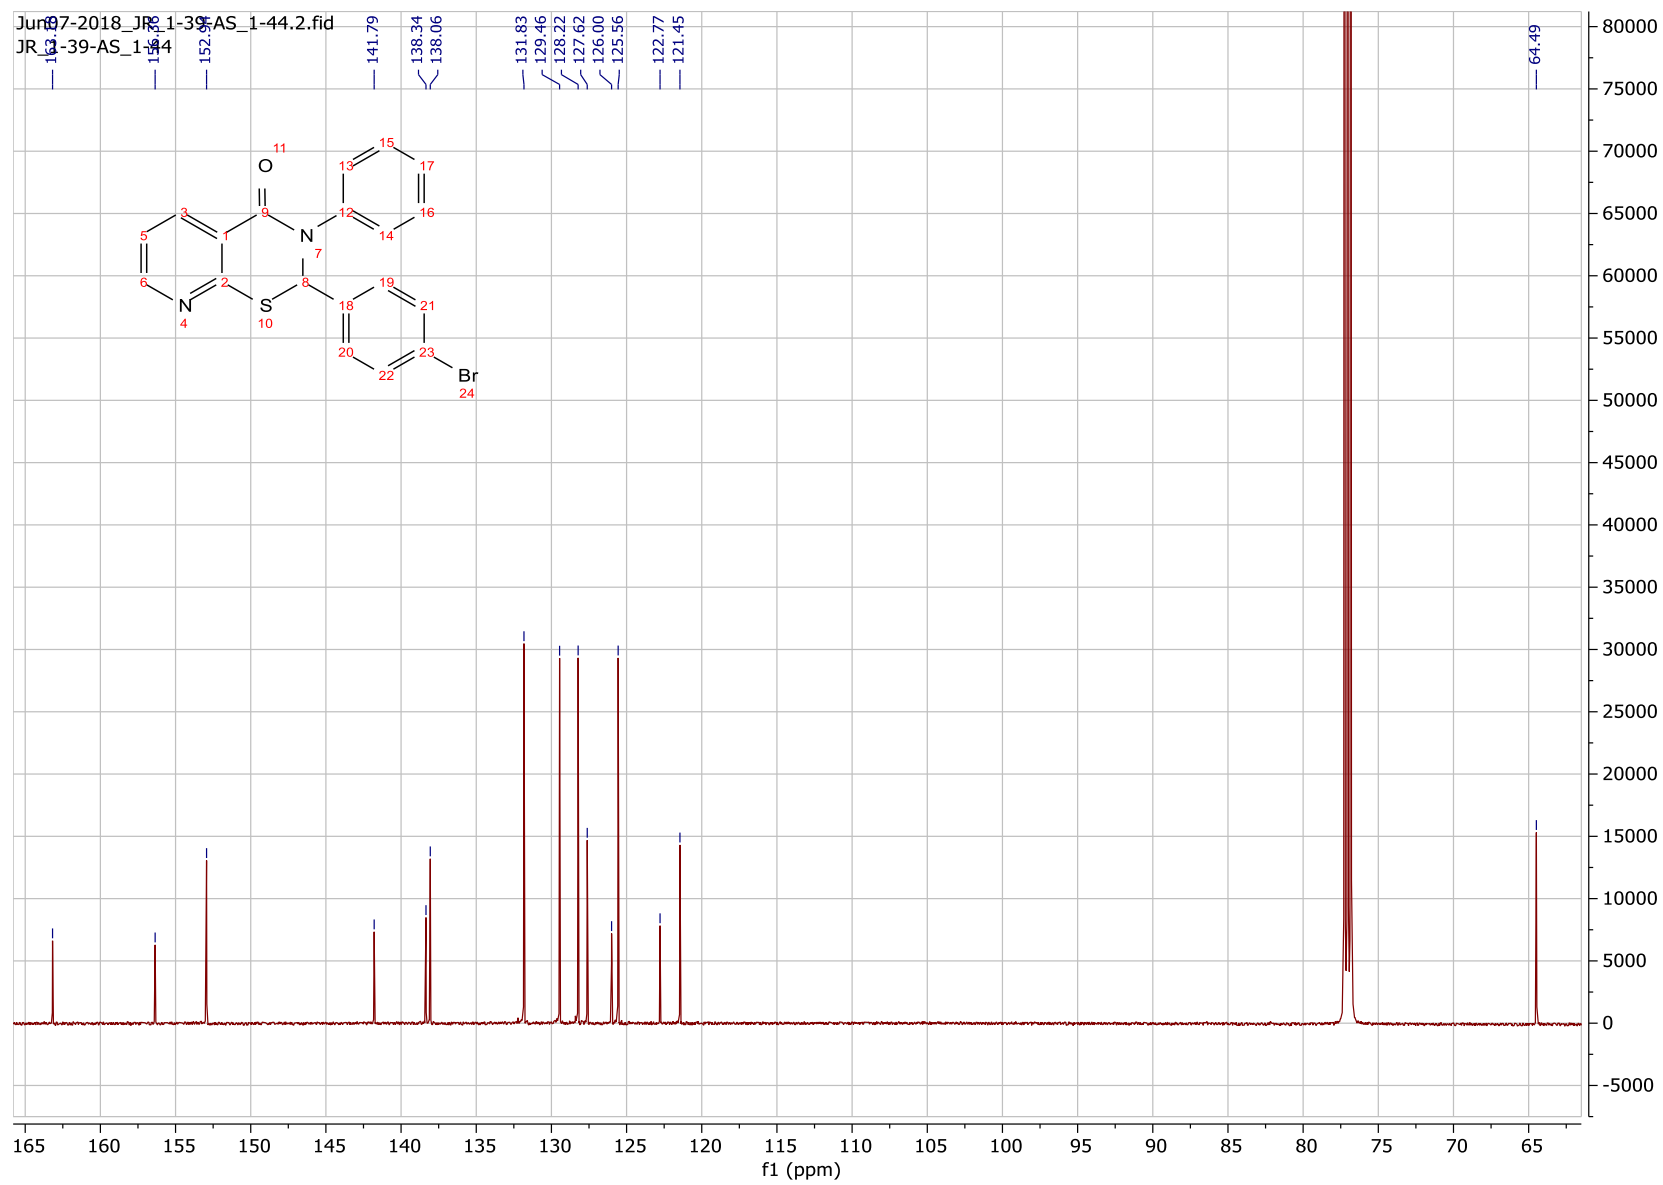

**Figure S20.**  $^{13}\text{C}$  NMR spectrum of compound **1g** (*m*-Br).

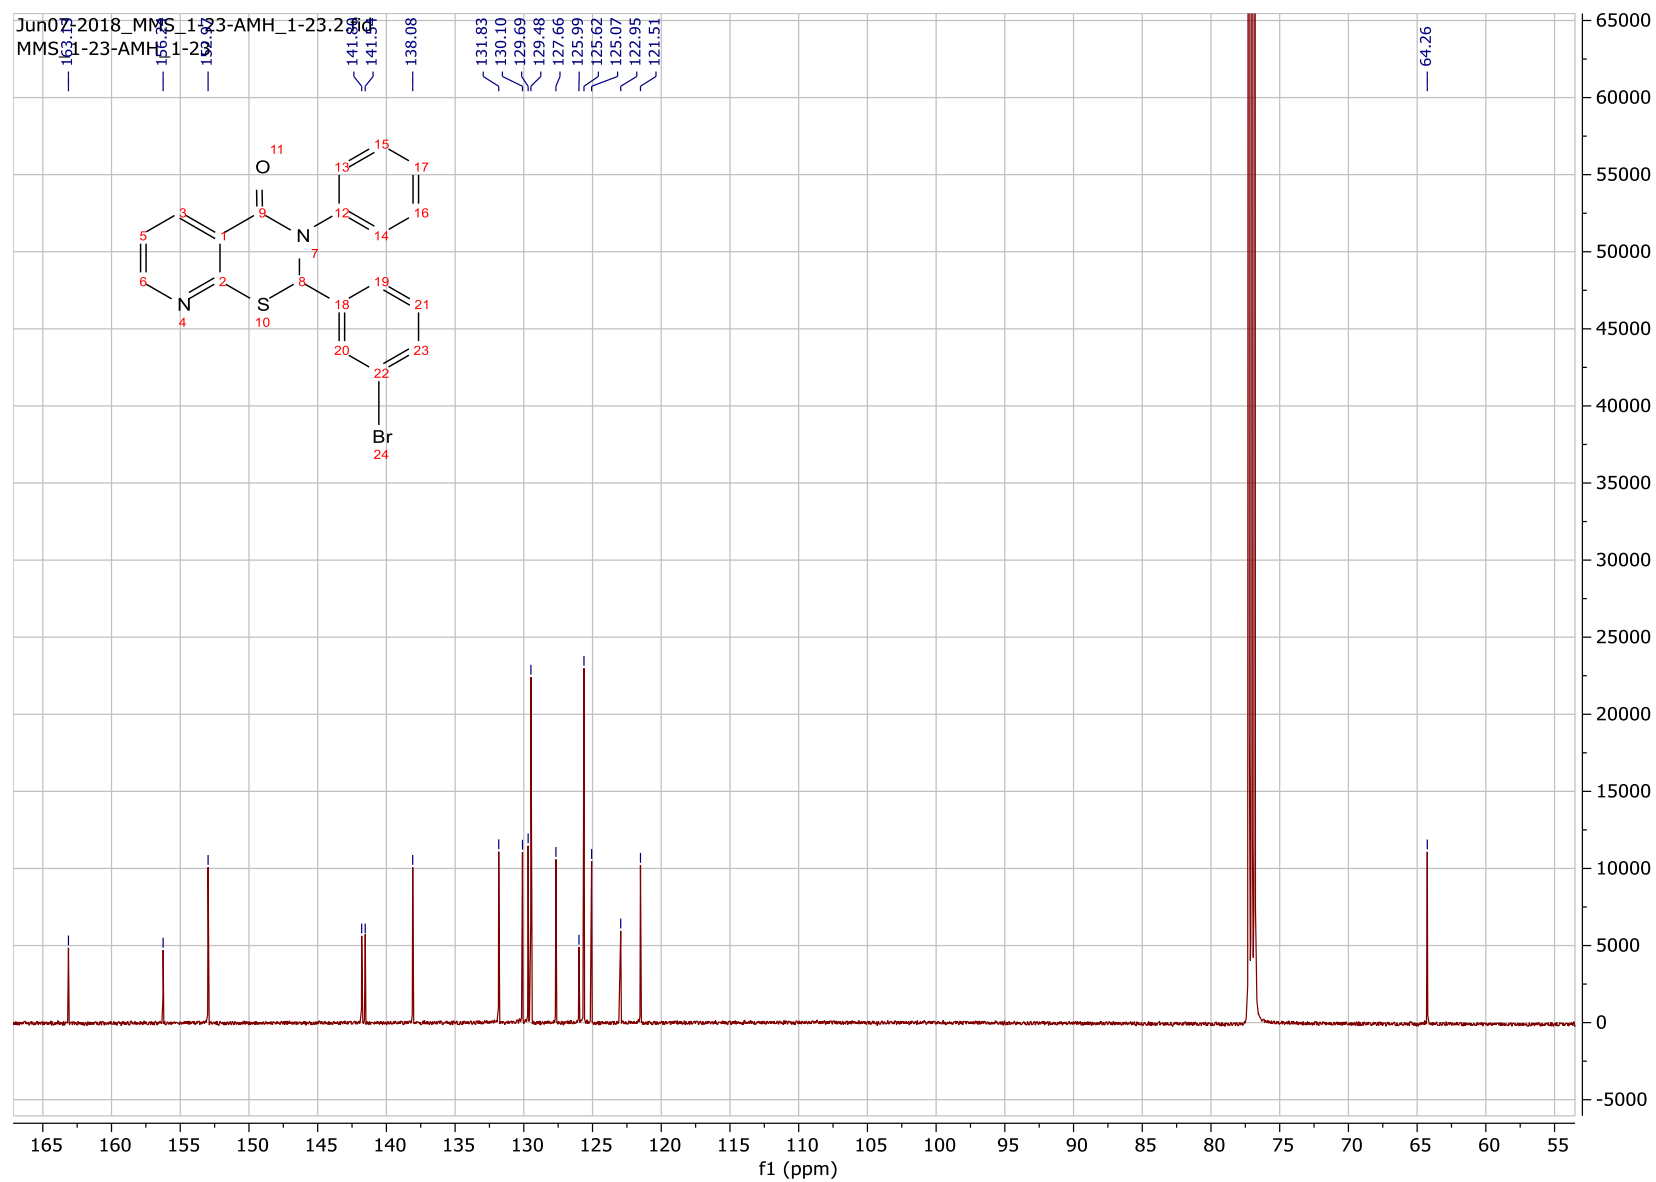

**Figure S21.**  $^{13}\text{C}$  NMR spectrum of compound **1h** (*p*-F).

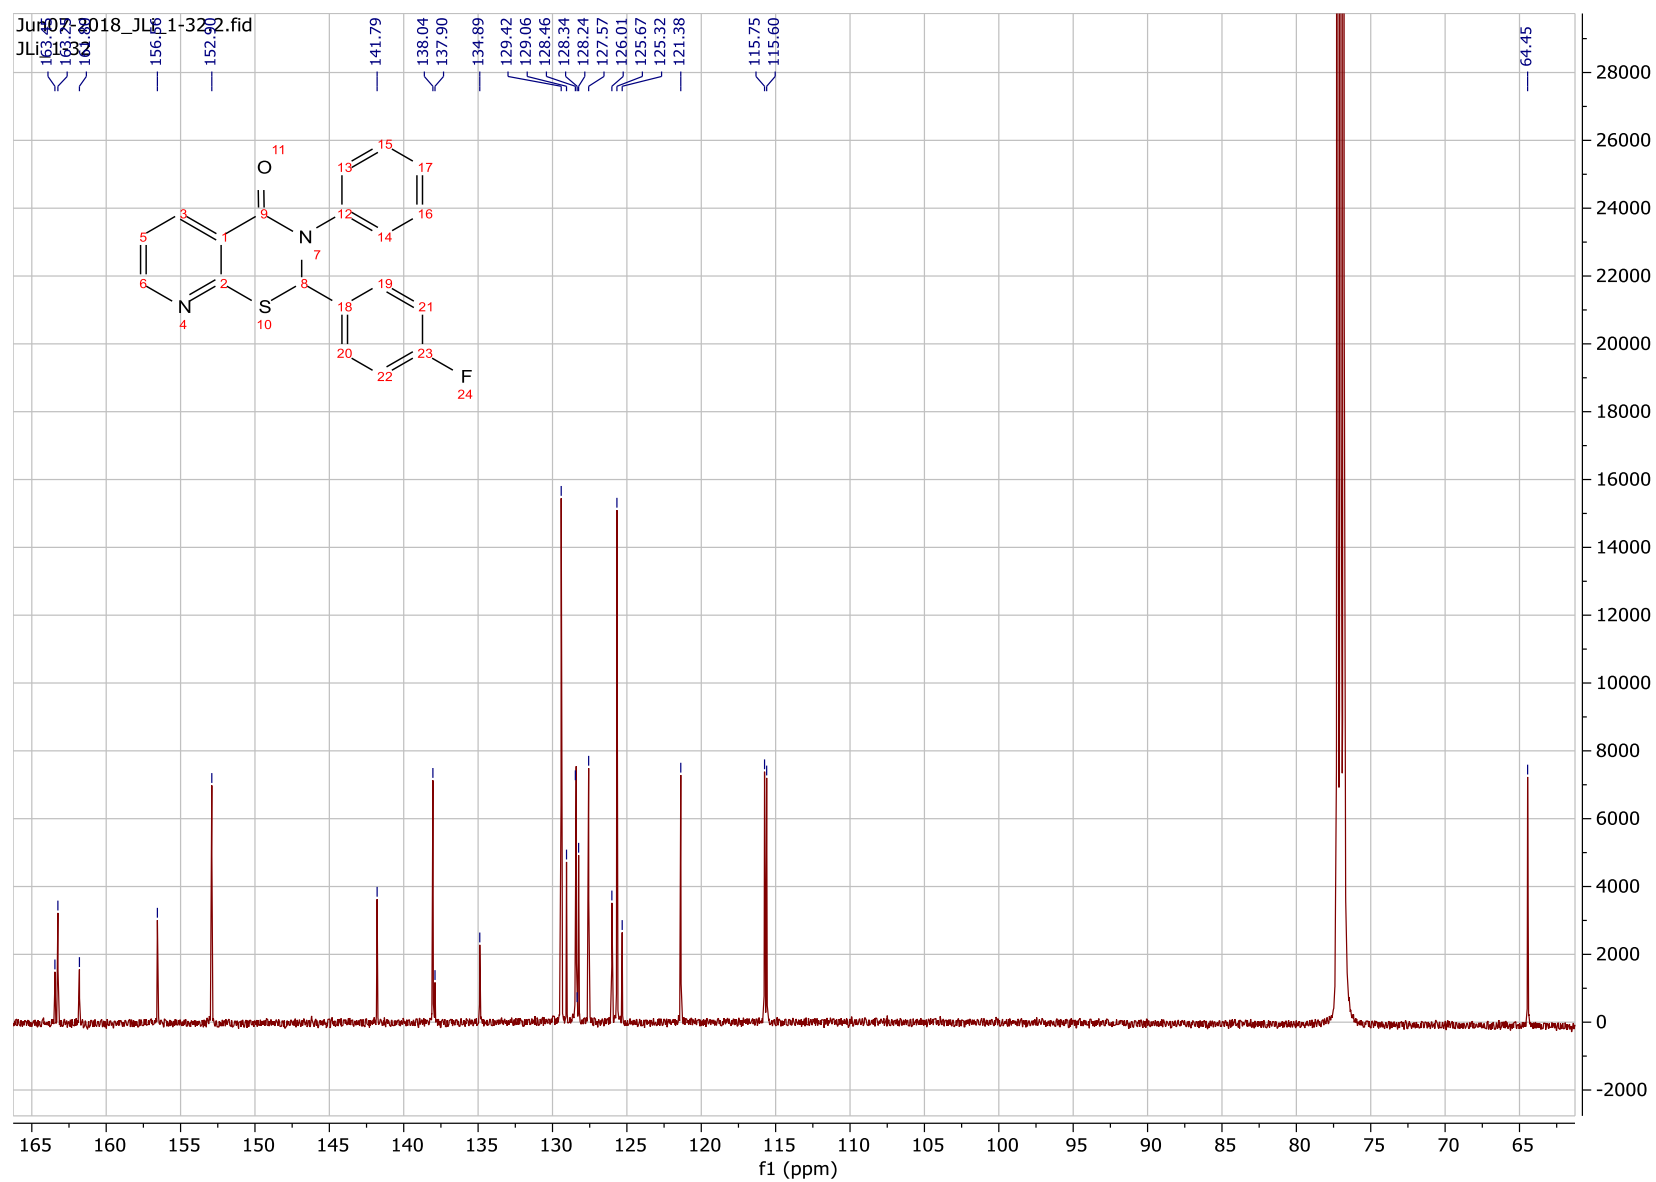

**Figure S22.**  $^{13}\text{C}$  NMR spectrum of compound **1i** (*m*-F).

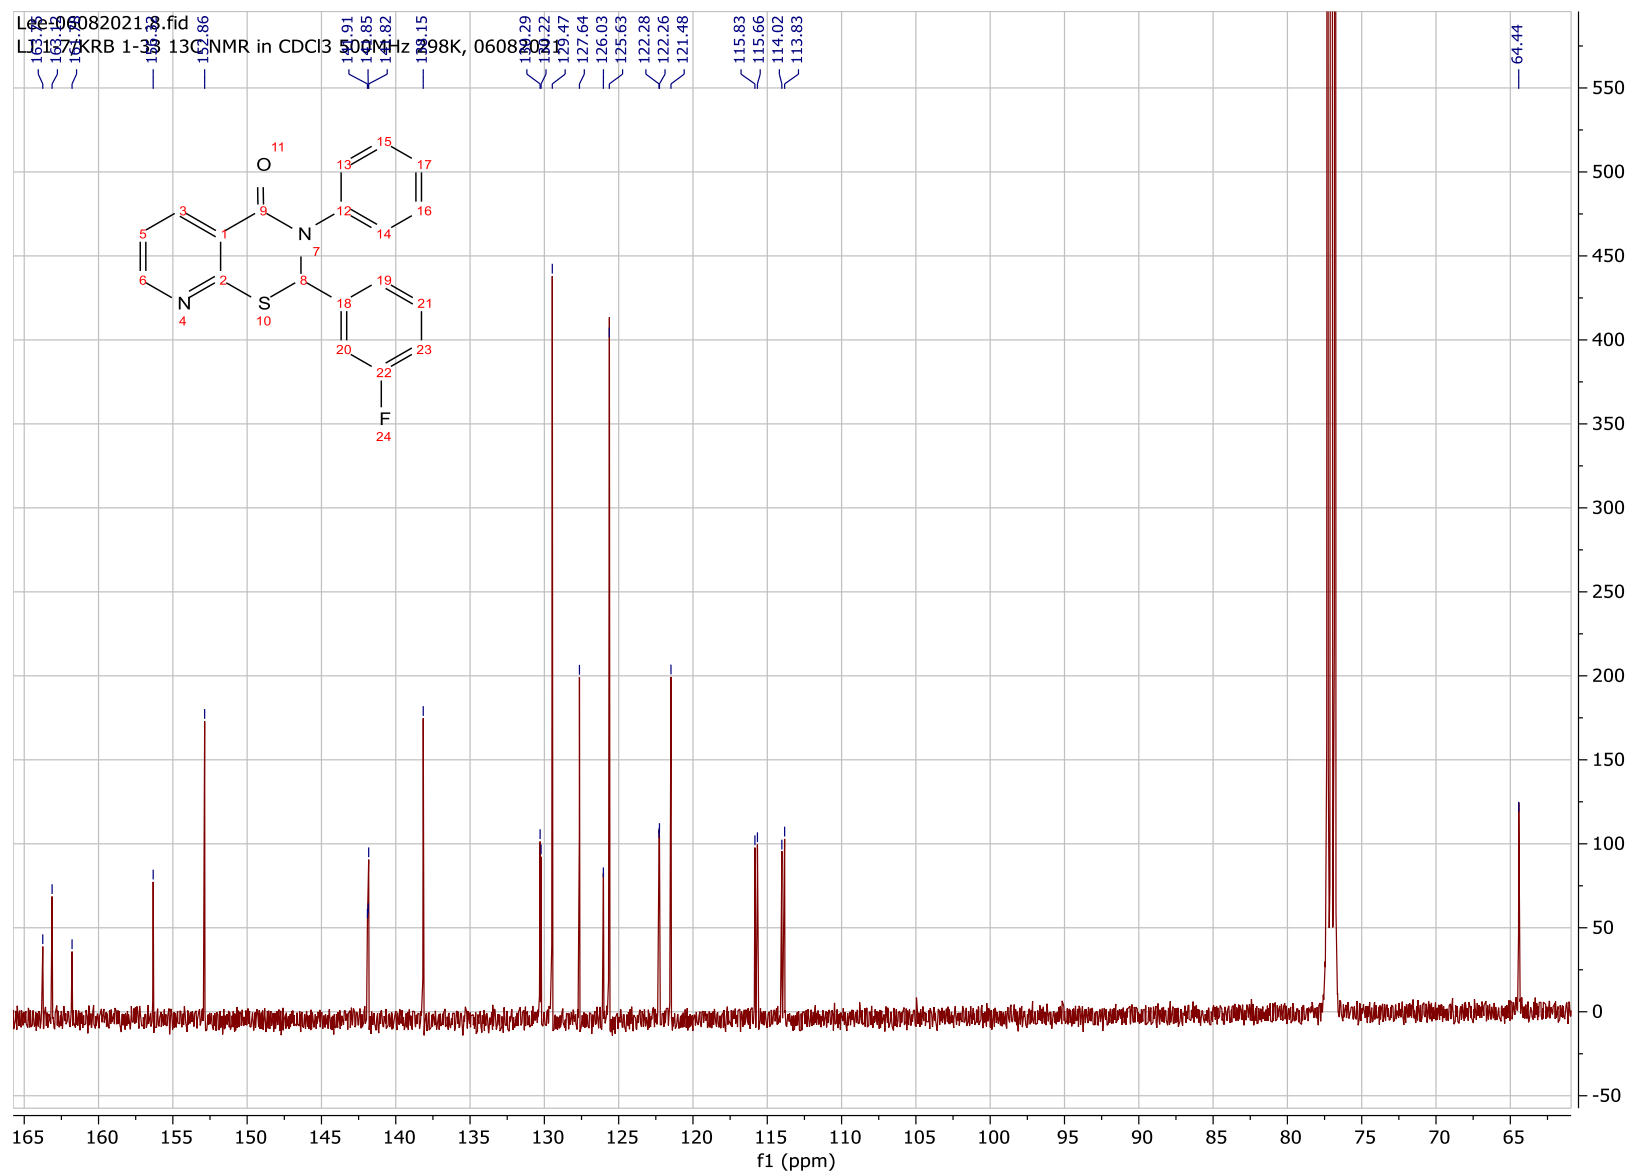

**Figure S23.**  $^{13}\text{C}$  NMR spectrum of compound **1k** (*p*-Me).

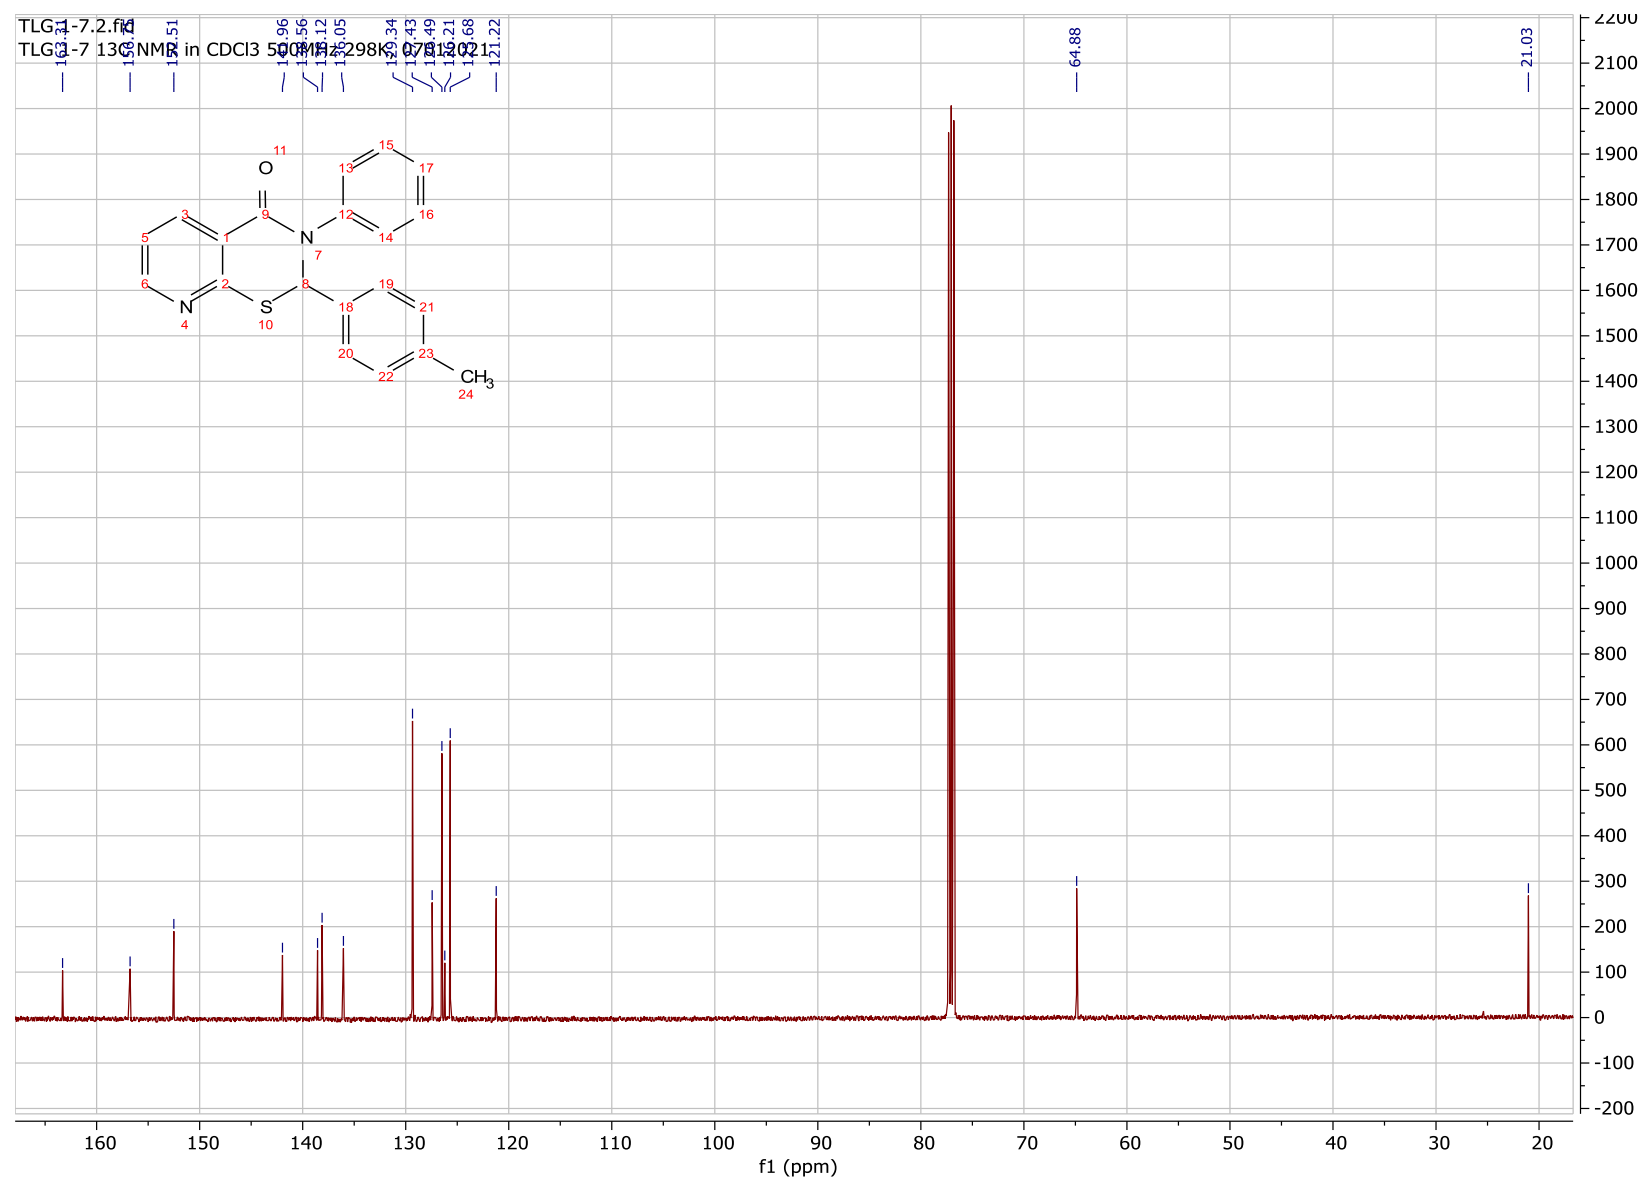

**Figure S24.**  $^{13}\text{C}$  NMR spectrum of compound **1l** (*m*-Me).

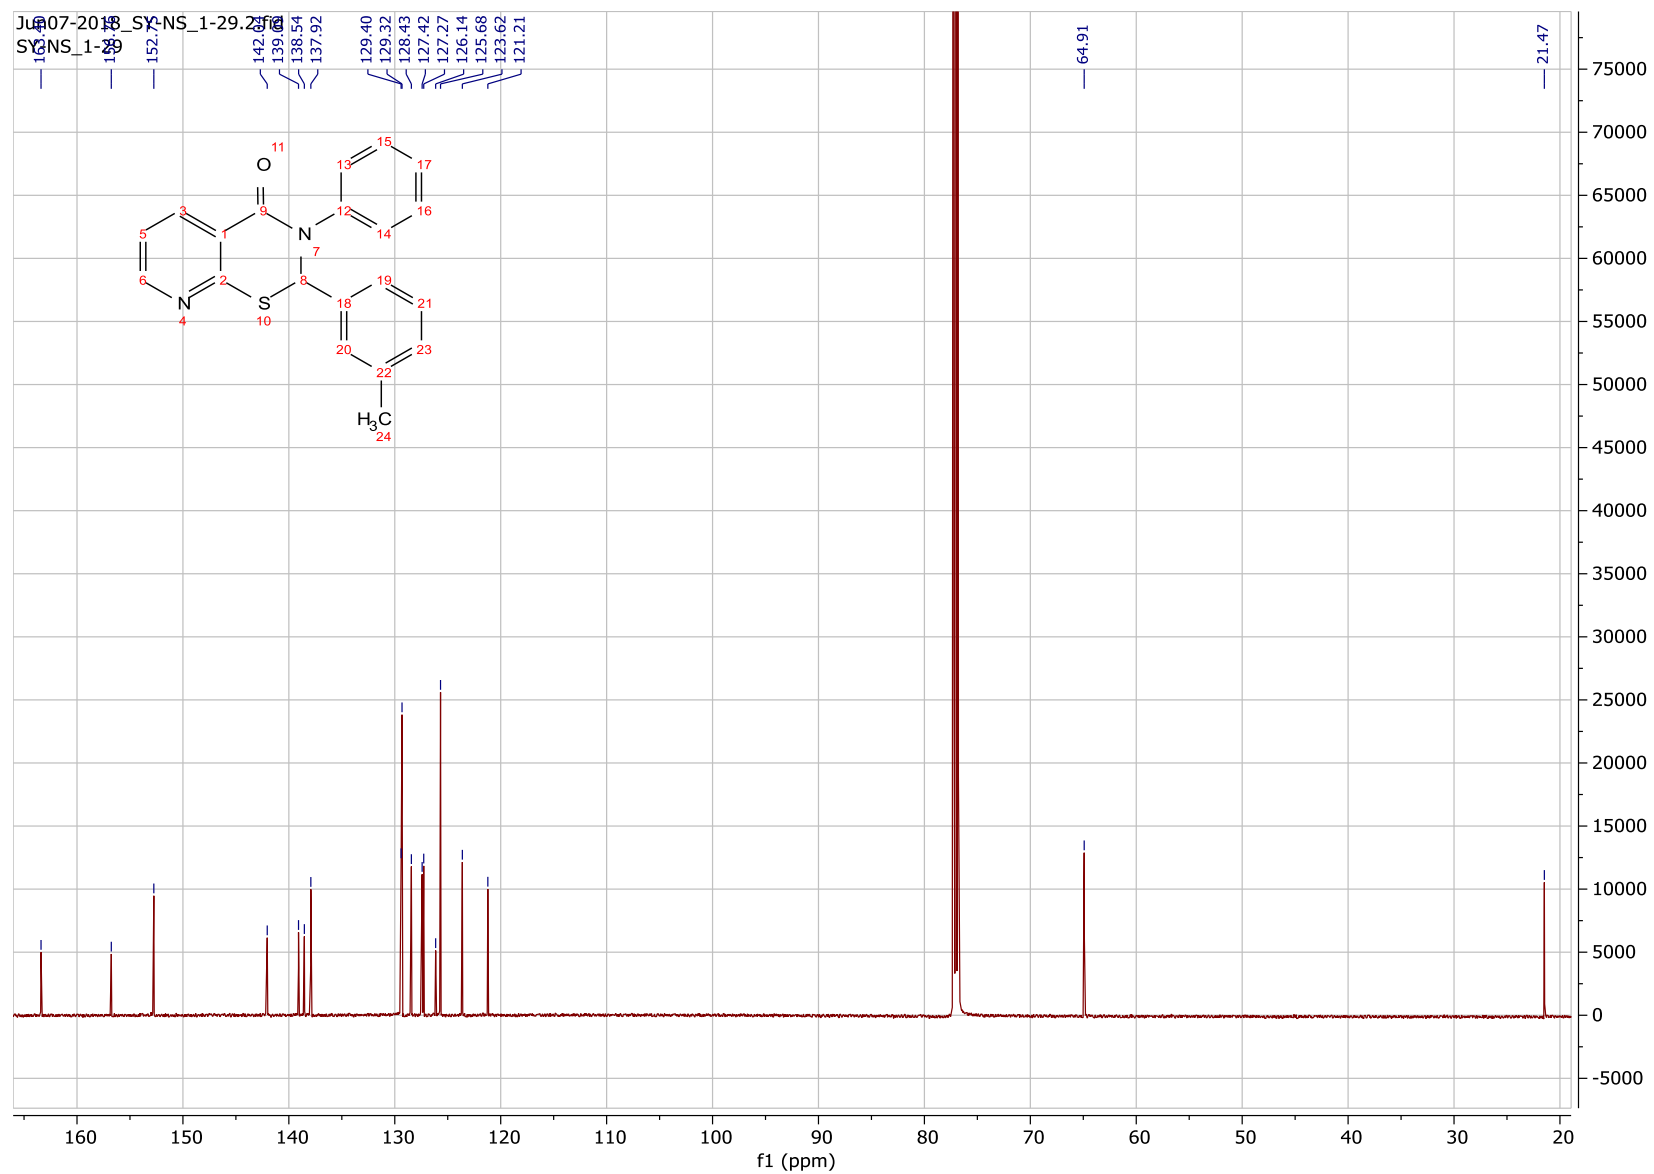

**Figure S25.**  $^{13}\text{C}$  NMR spectrum of compound **1m** (*p*-OMe).

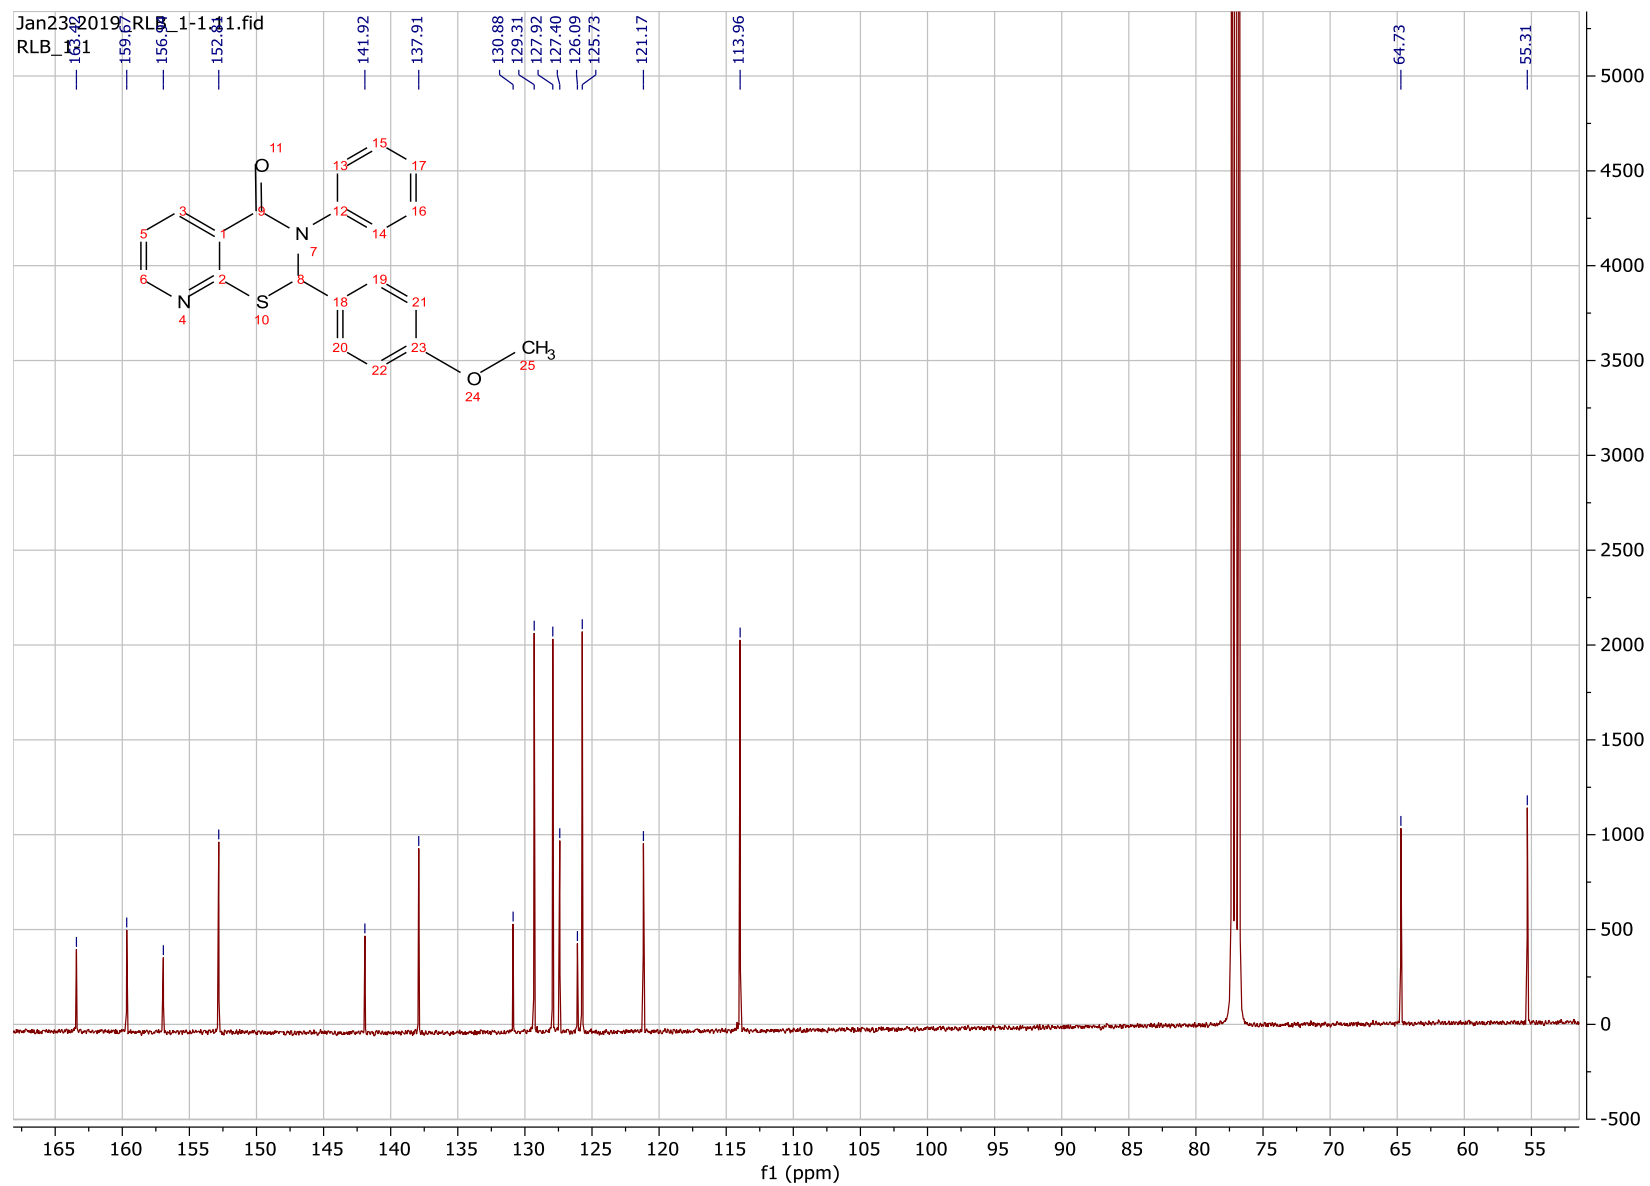

**Figure S26.**  $^{13}\text{C}$  NMR spectrum of compound **1n** (*m*-OMe).

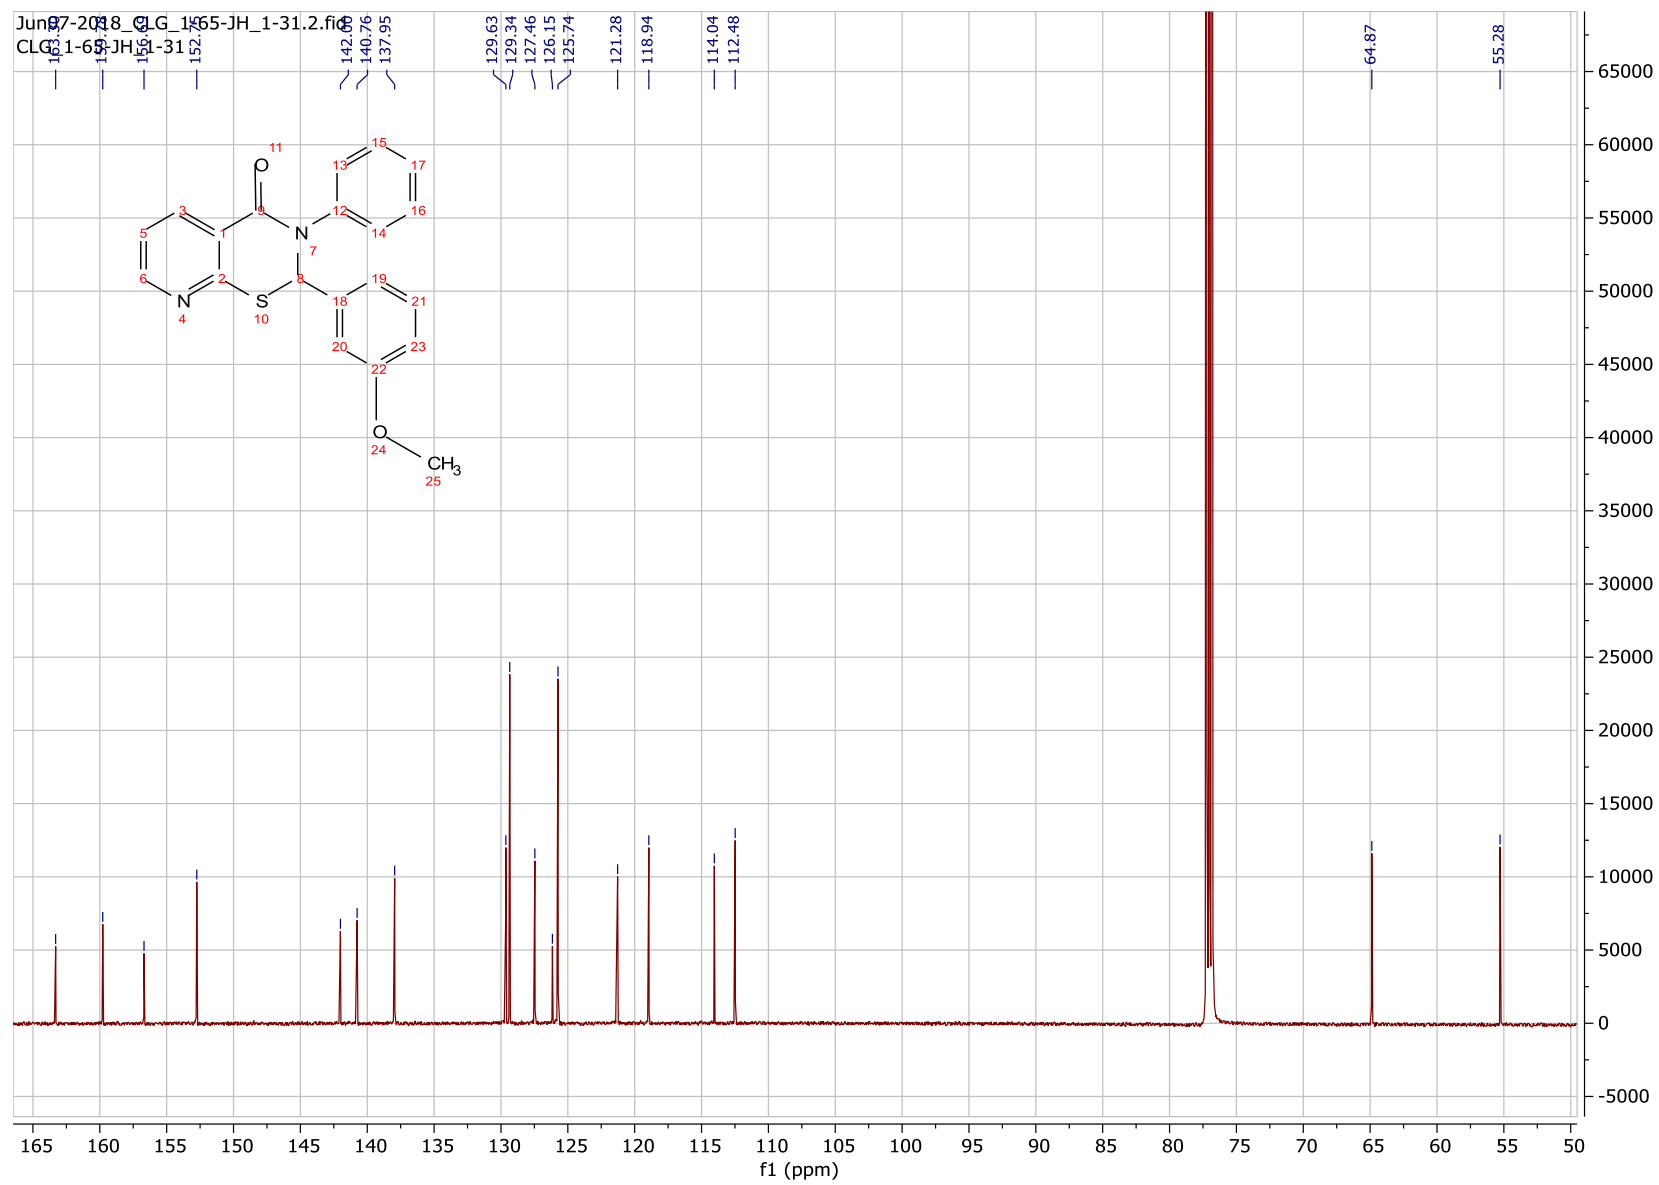

**Figure S27.**  $^{19}\text{F}$  NMR spectrum of compound **1d** (*p*- $\text{CF}_3$ ).

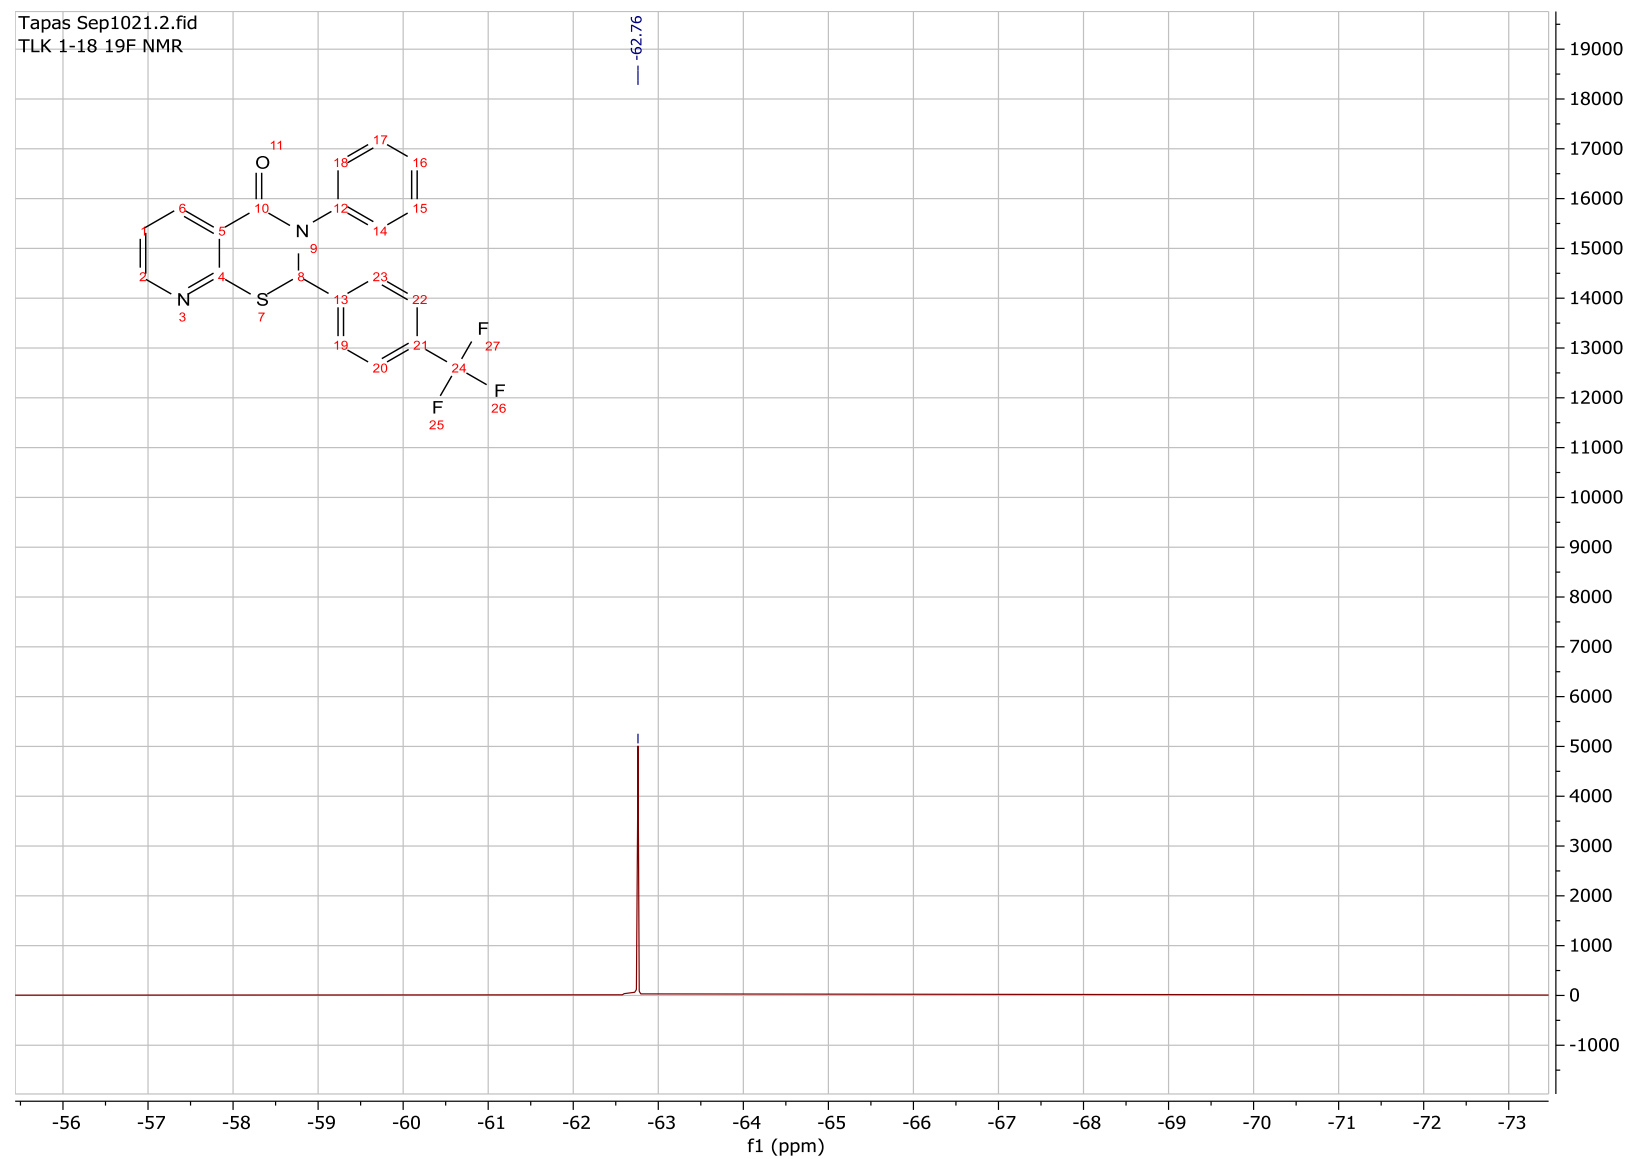

**Figure S28.**  $^{19}\text{F}$  NMR spectrum of compound **1e** (*m*-CF<sub>3</sub>).

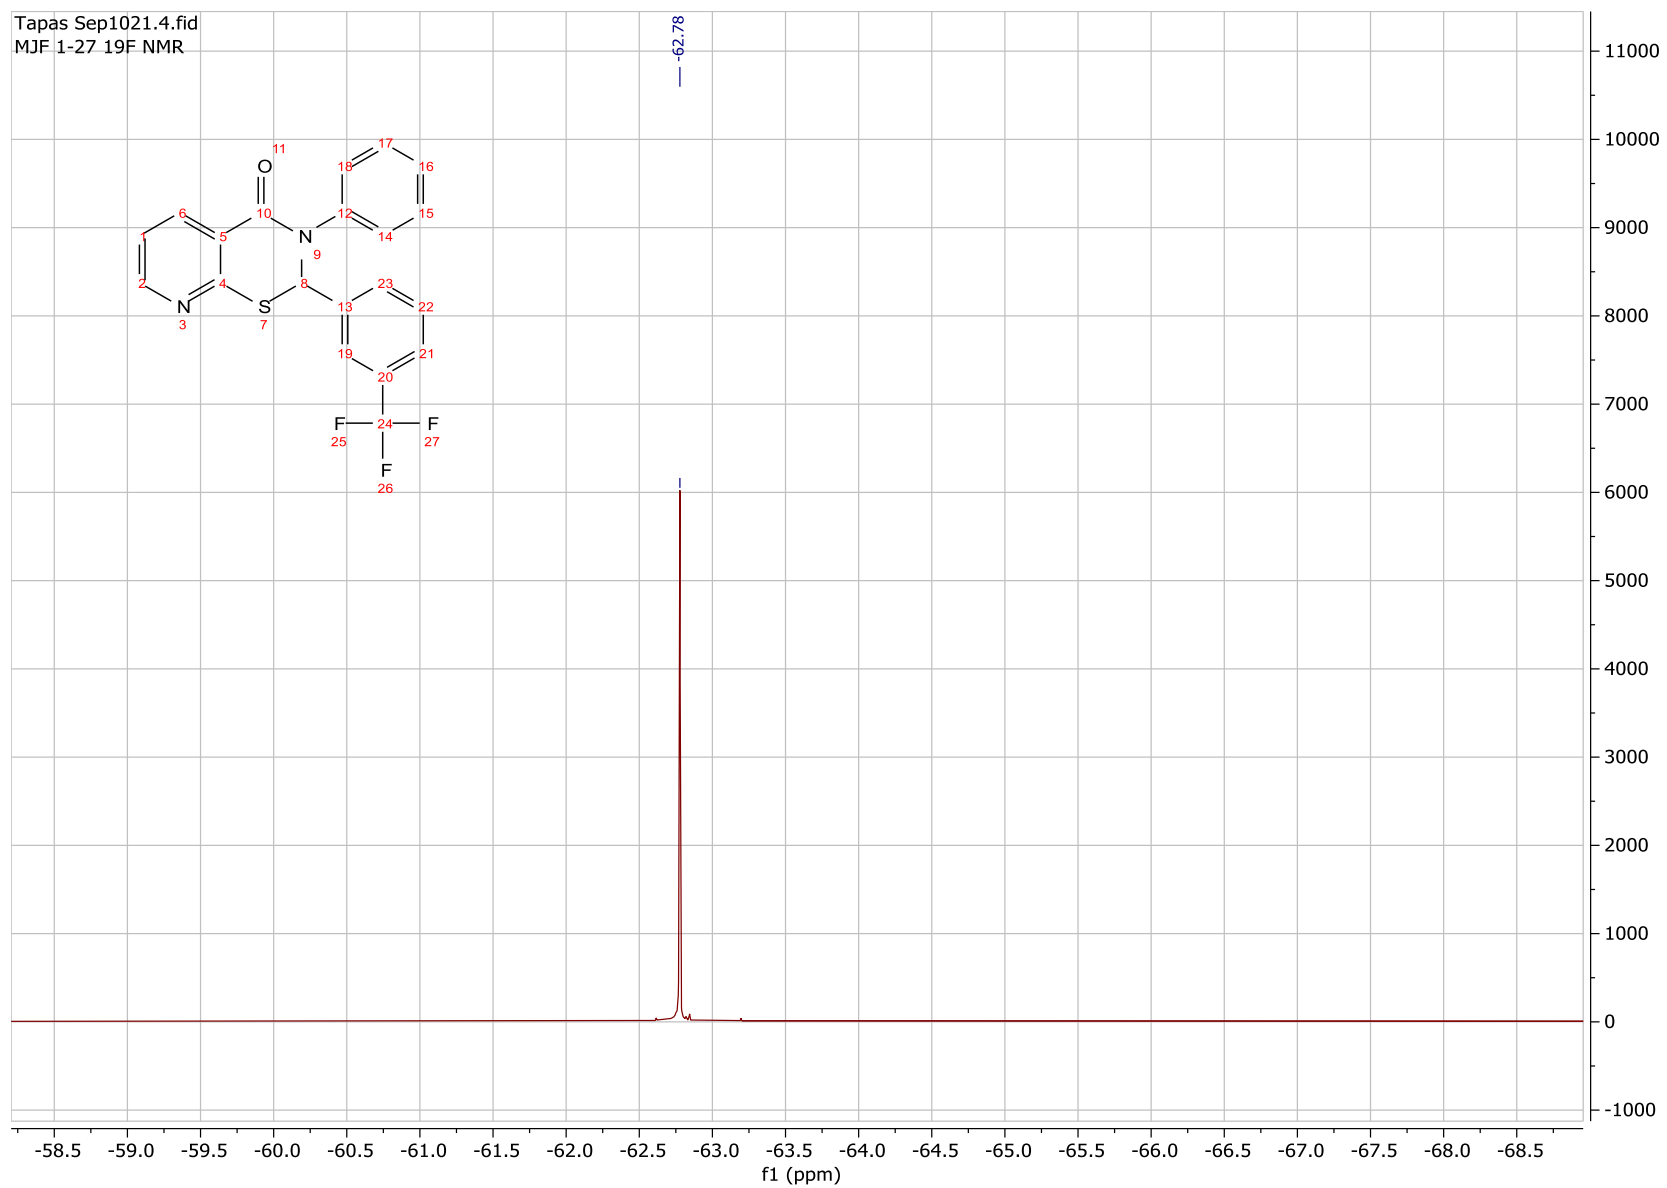

**Figure S29.**  $^{19}\text{F}$  NMR spectrum of compound **1h** (*p*-F).

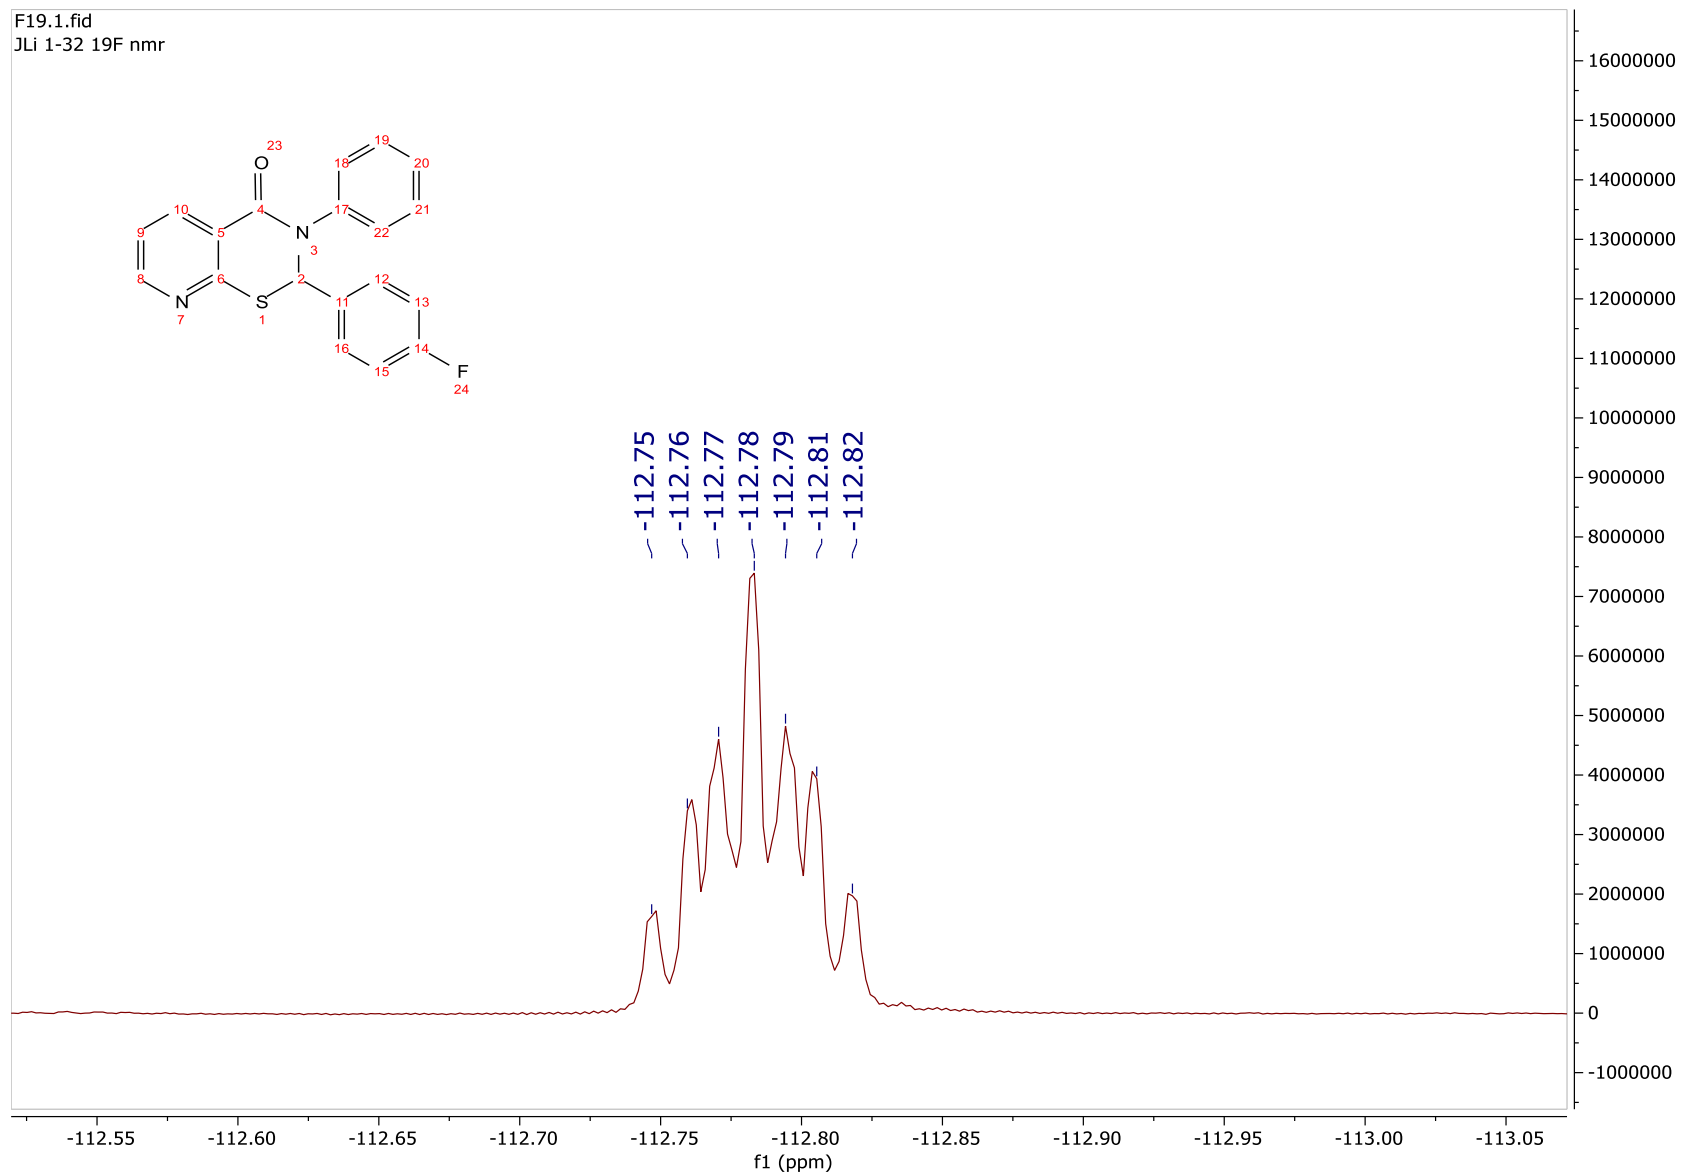

**Figure S30.**  $^{19}\text{F}$  NMR spectrum of compound **1i** (*m*-F).

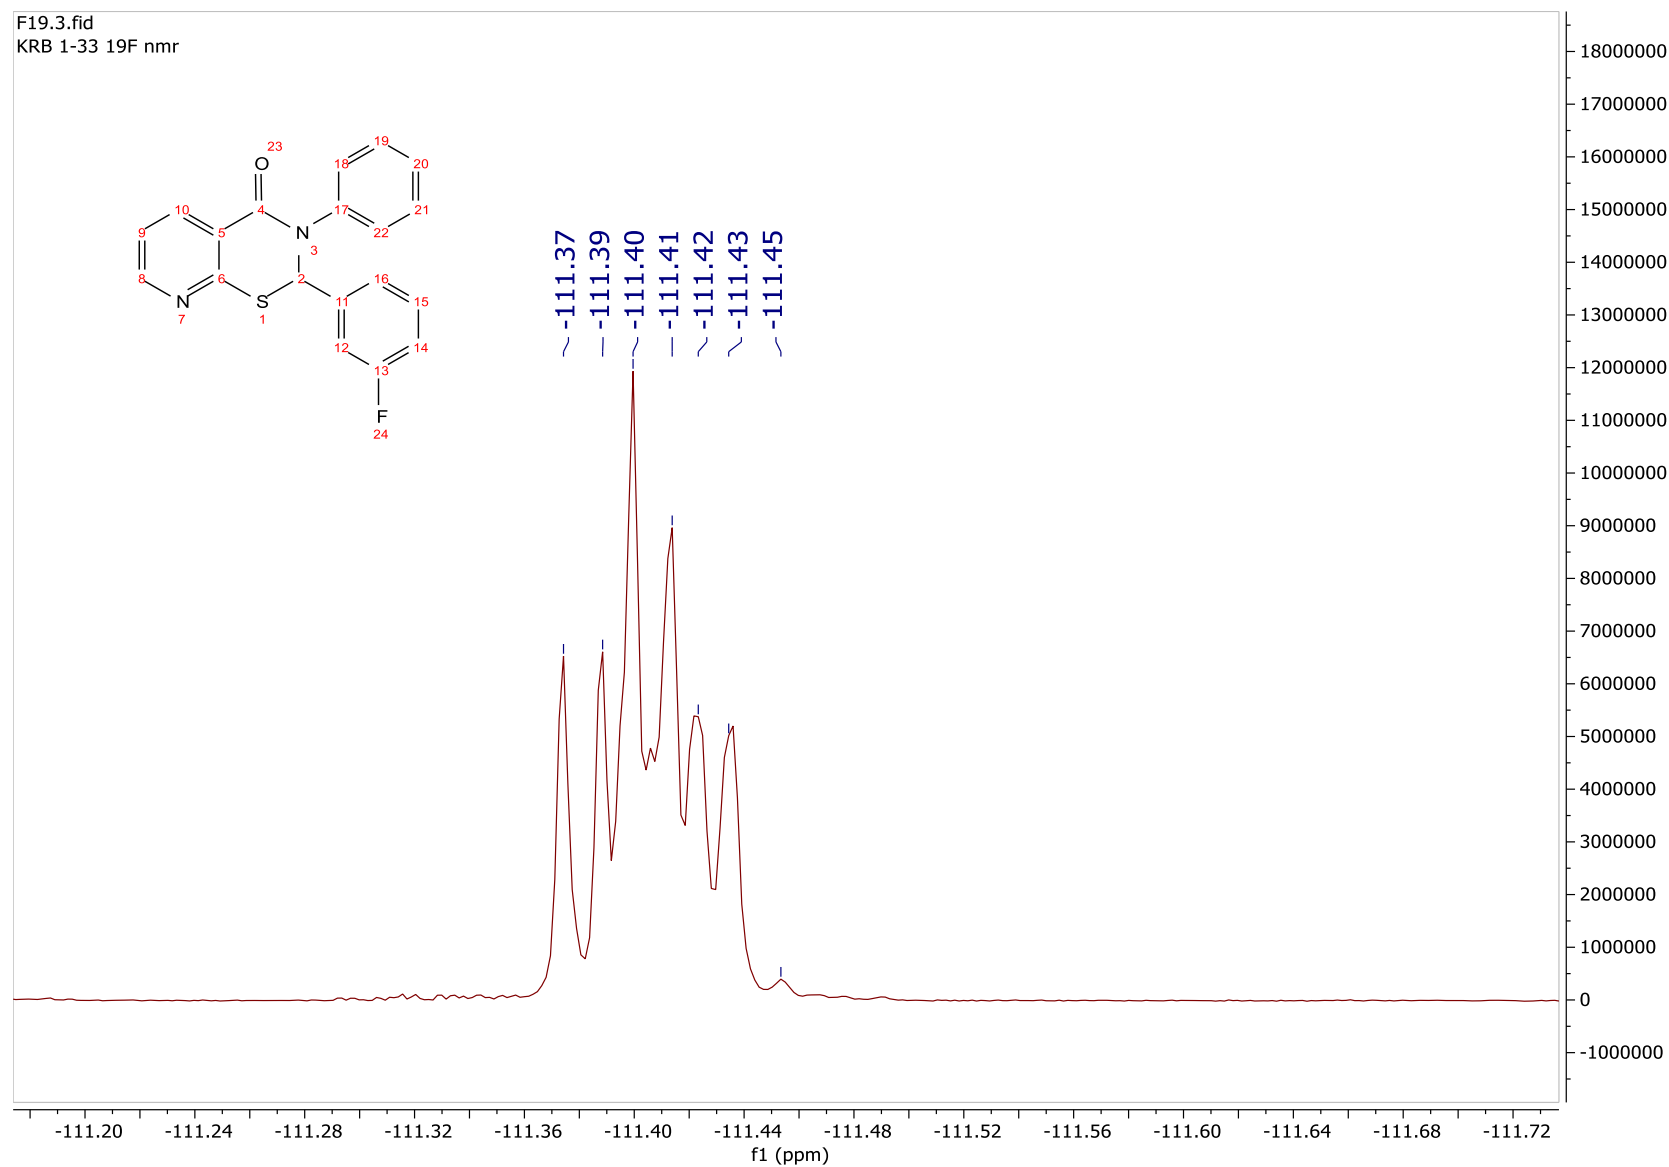

**Figure S31.** FT-IR spectrum of compound **1a** (*p*-NO<sub>2</sub>).

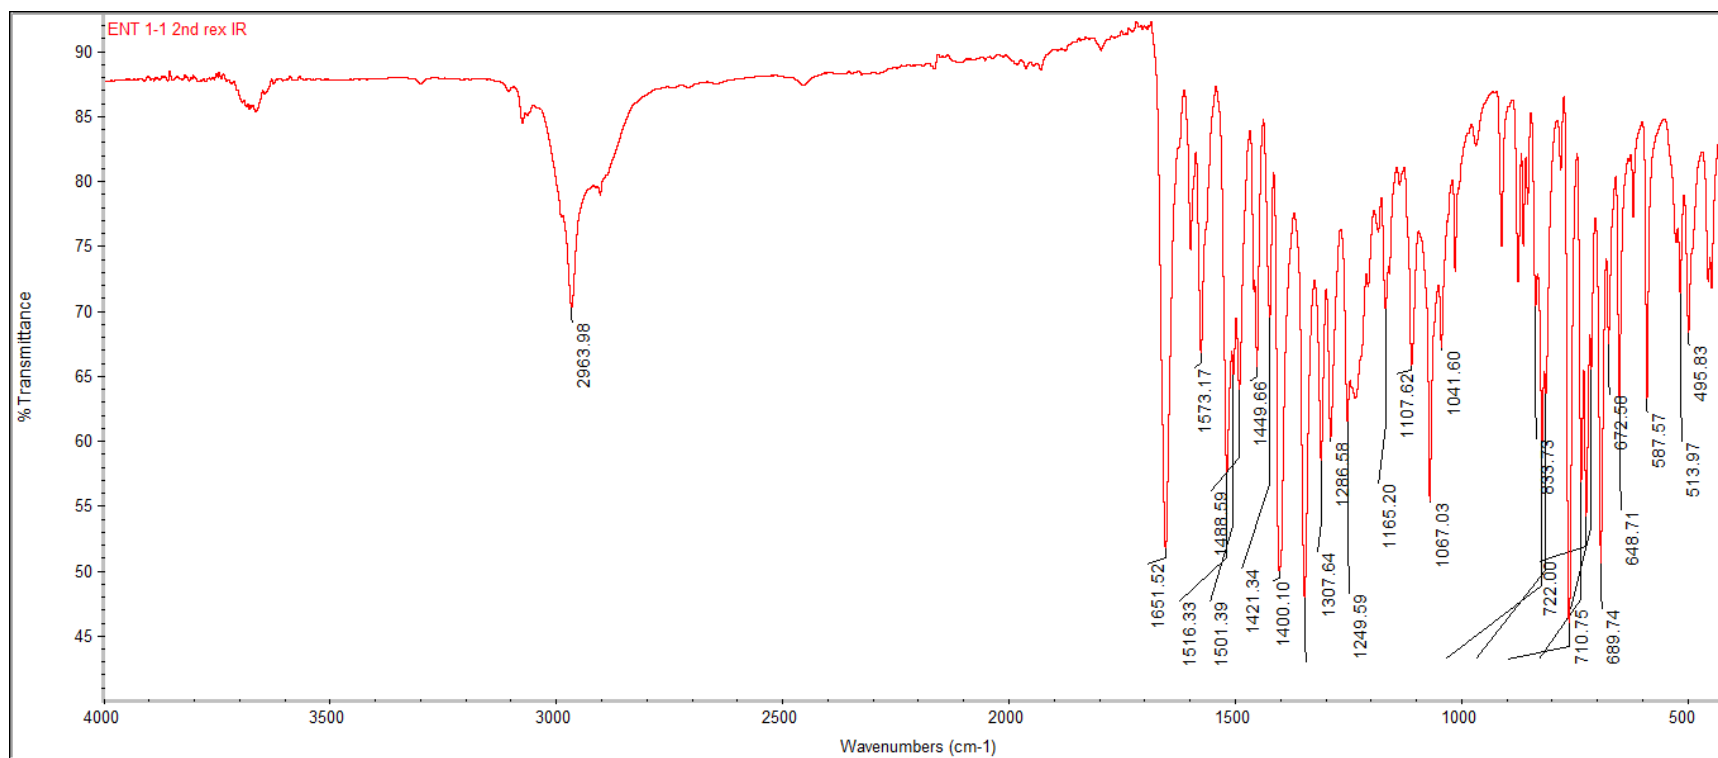

**Figure S32.** FT-IR spectrum of compound **1b** (*m*-NO<sub>2</sub>).

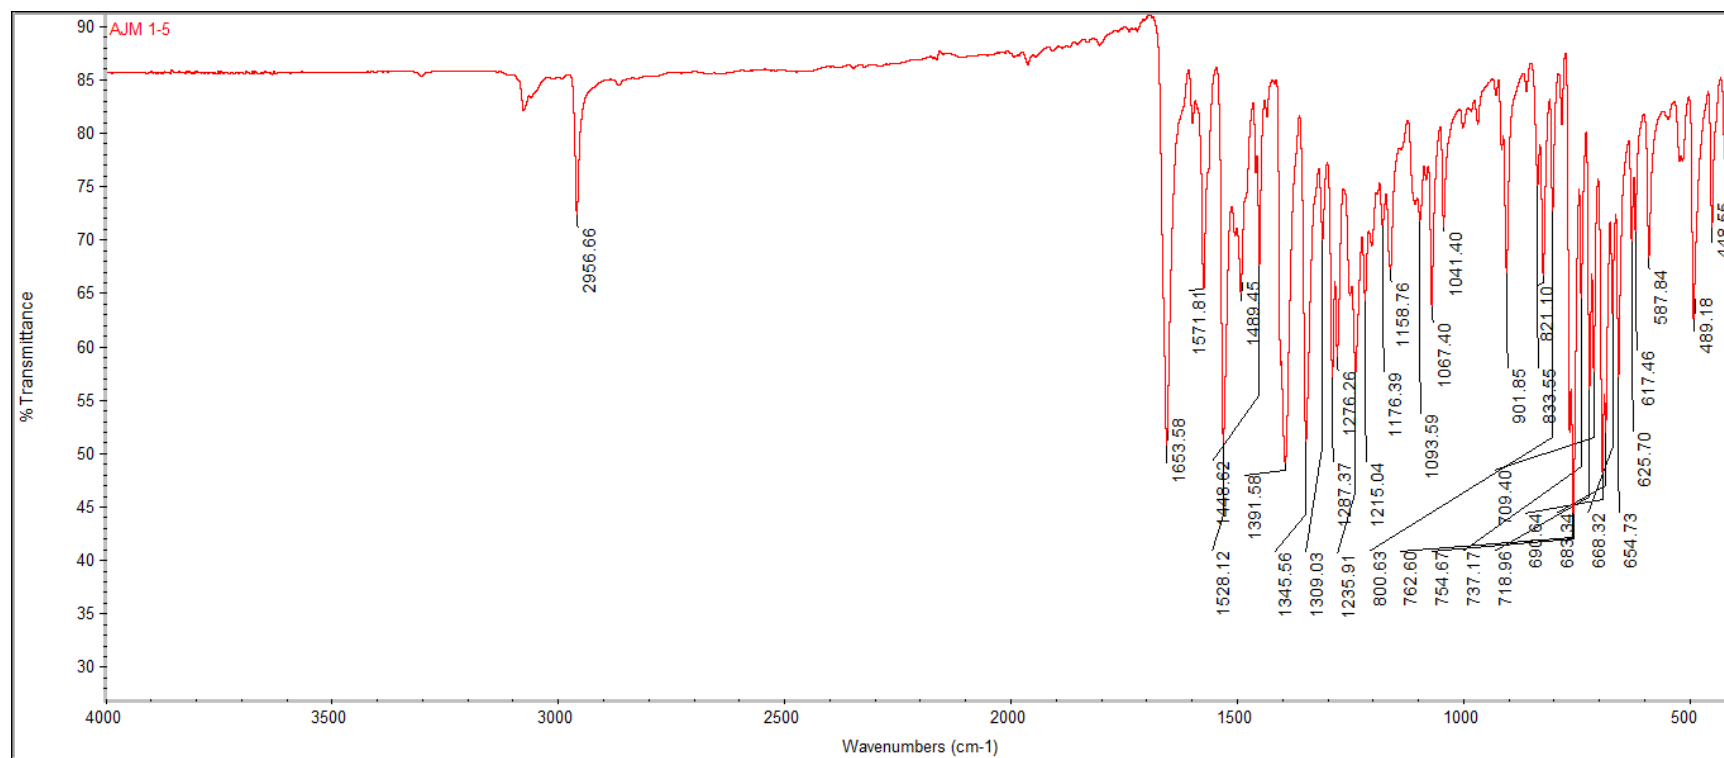

**Figure S33.** FT-IR spectrum of compound **1c** (*o*-NO<sub>2</sub>).

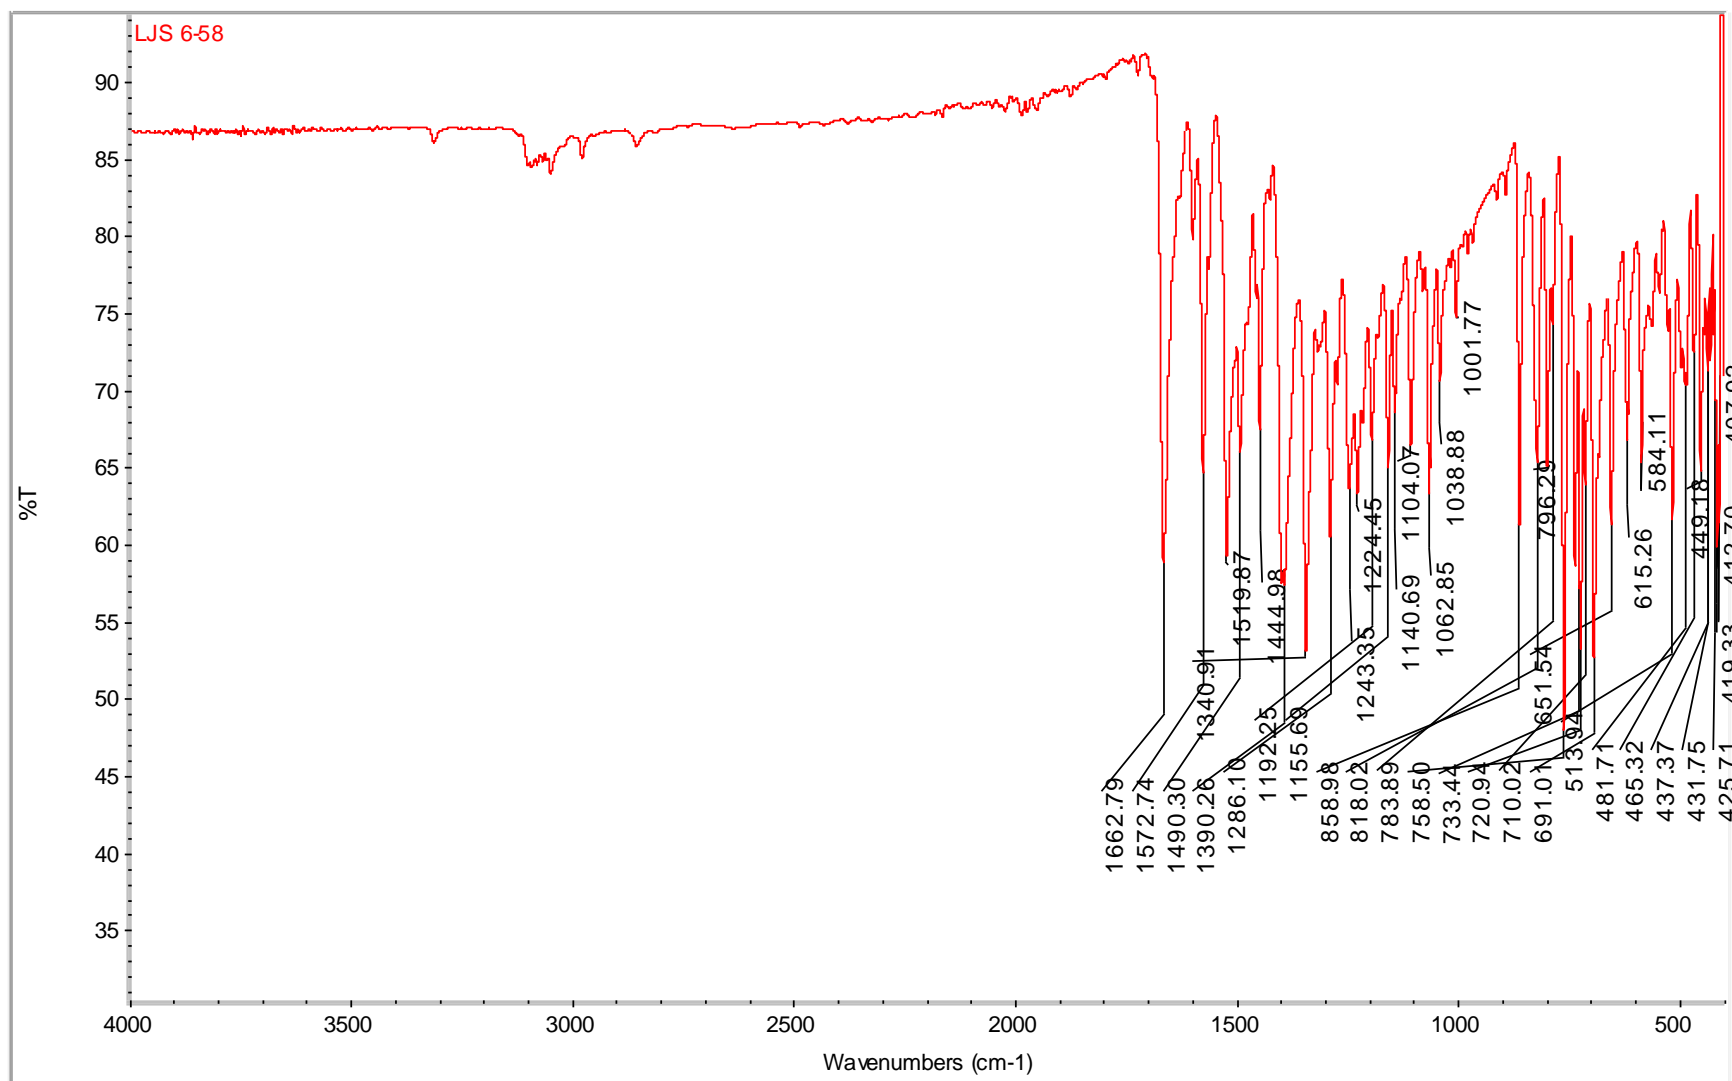

Figure S34. FT-IR spectrum of compound **1d** (*p*-CF<sub>3</sub>).

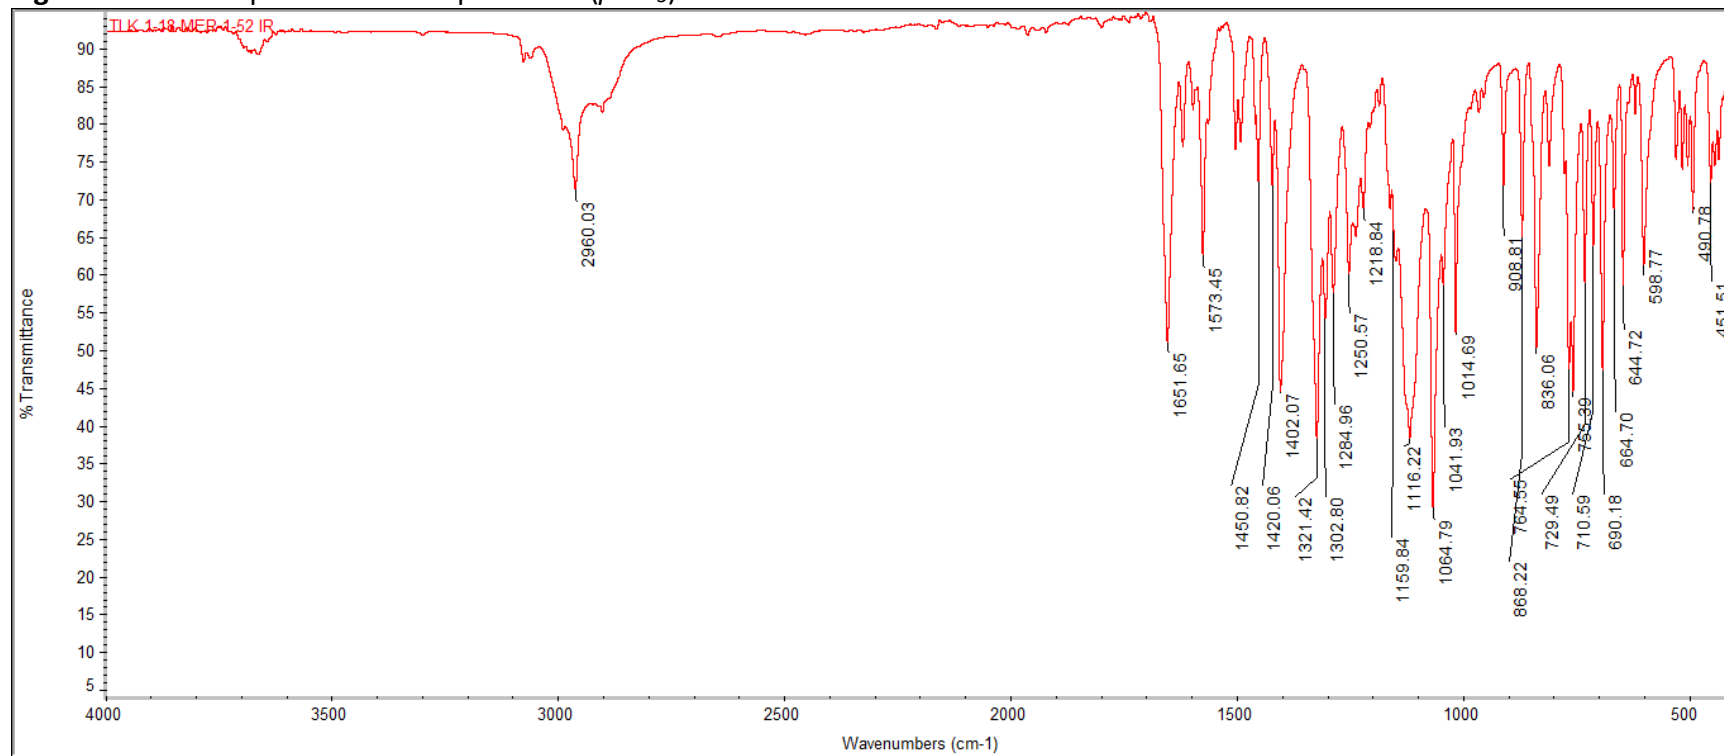

Figure S35. FT-IR spectrum of compound **1e** (*m*-CF<sub>3</sub>).

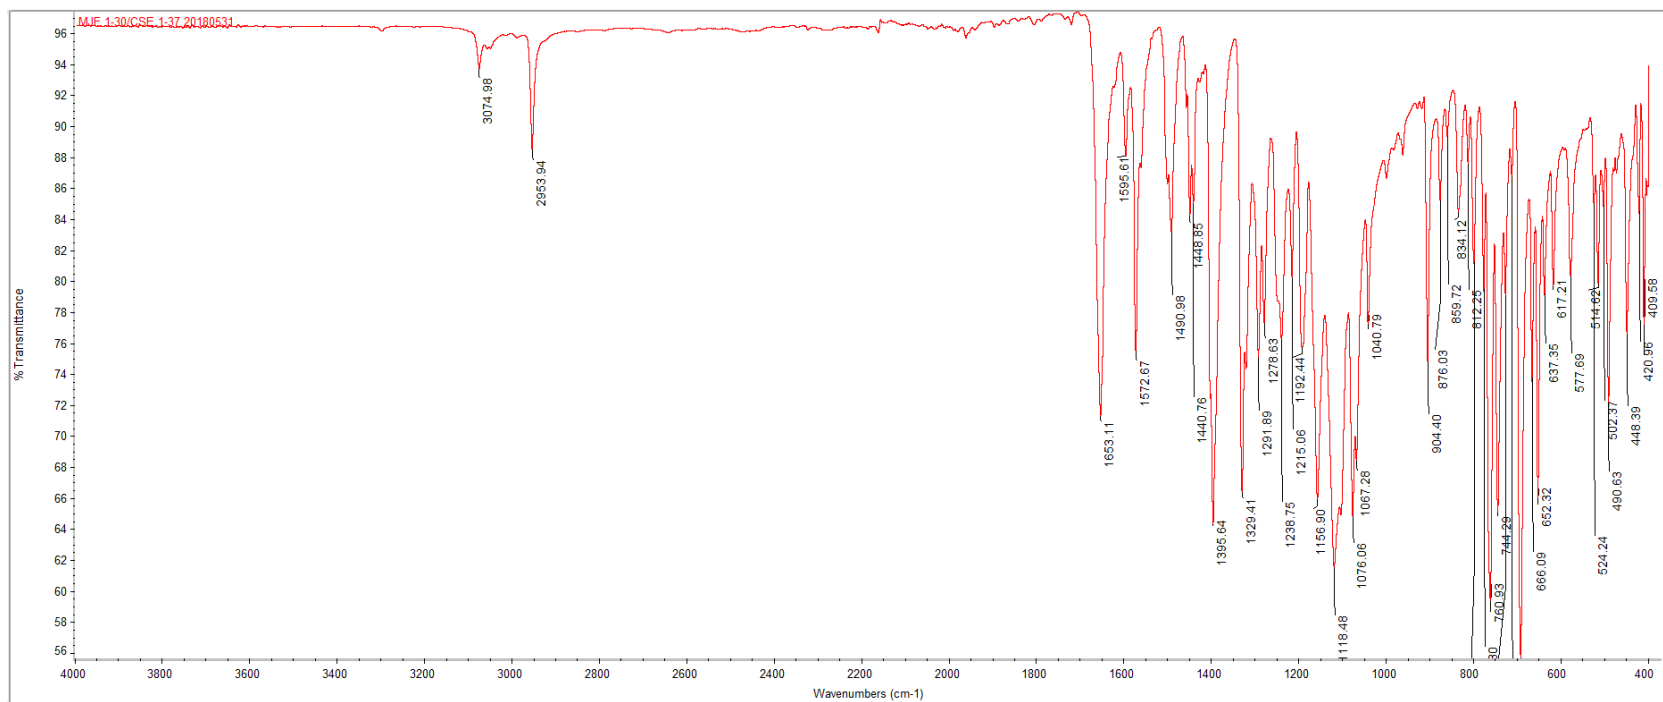

Figure S36. FT-IR spectrum of compound **1f** (*p*-Br).

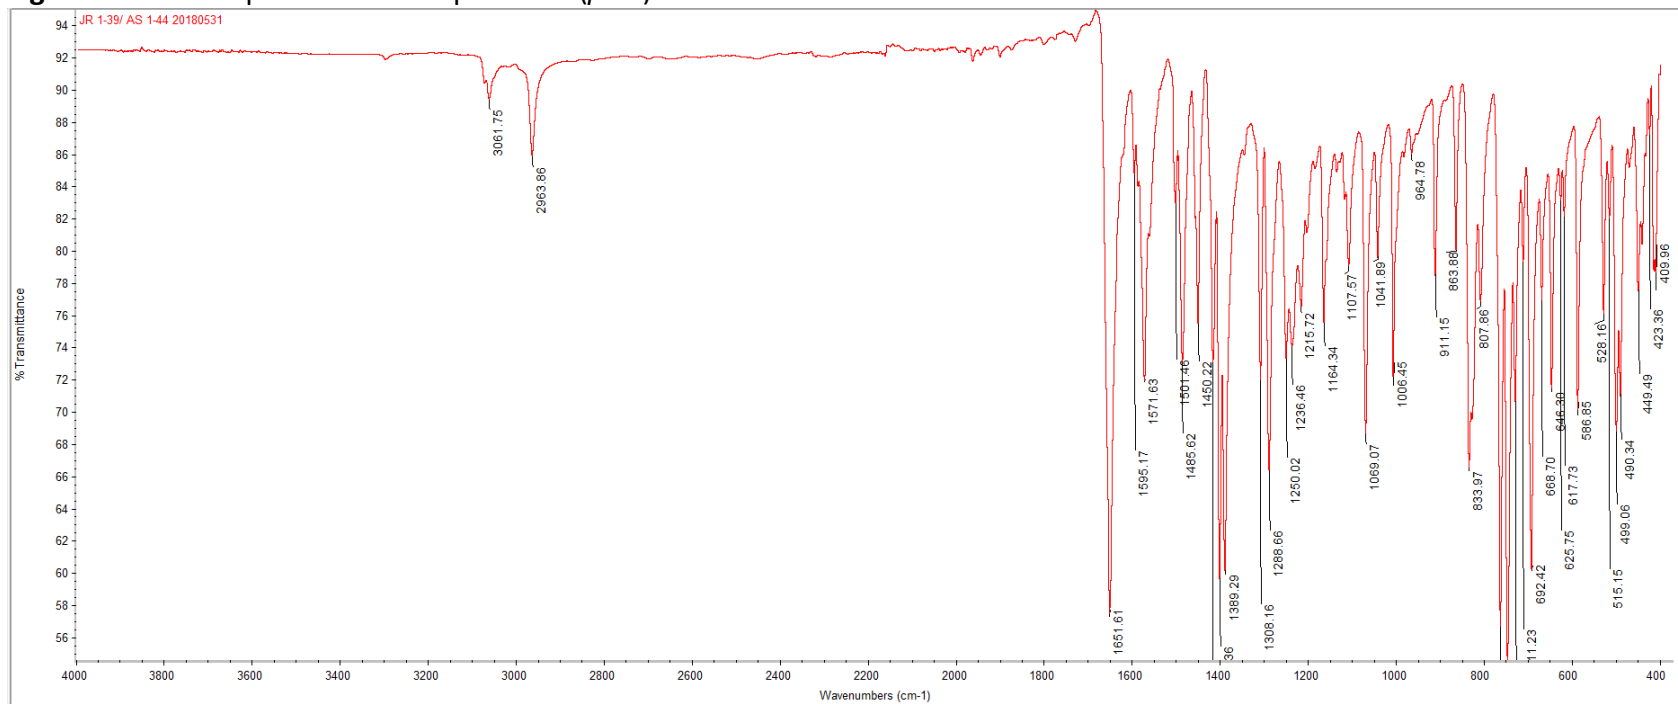

**Figure S37.** FT-IR spectrum of compound **1g** (*m*-Br).

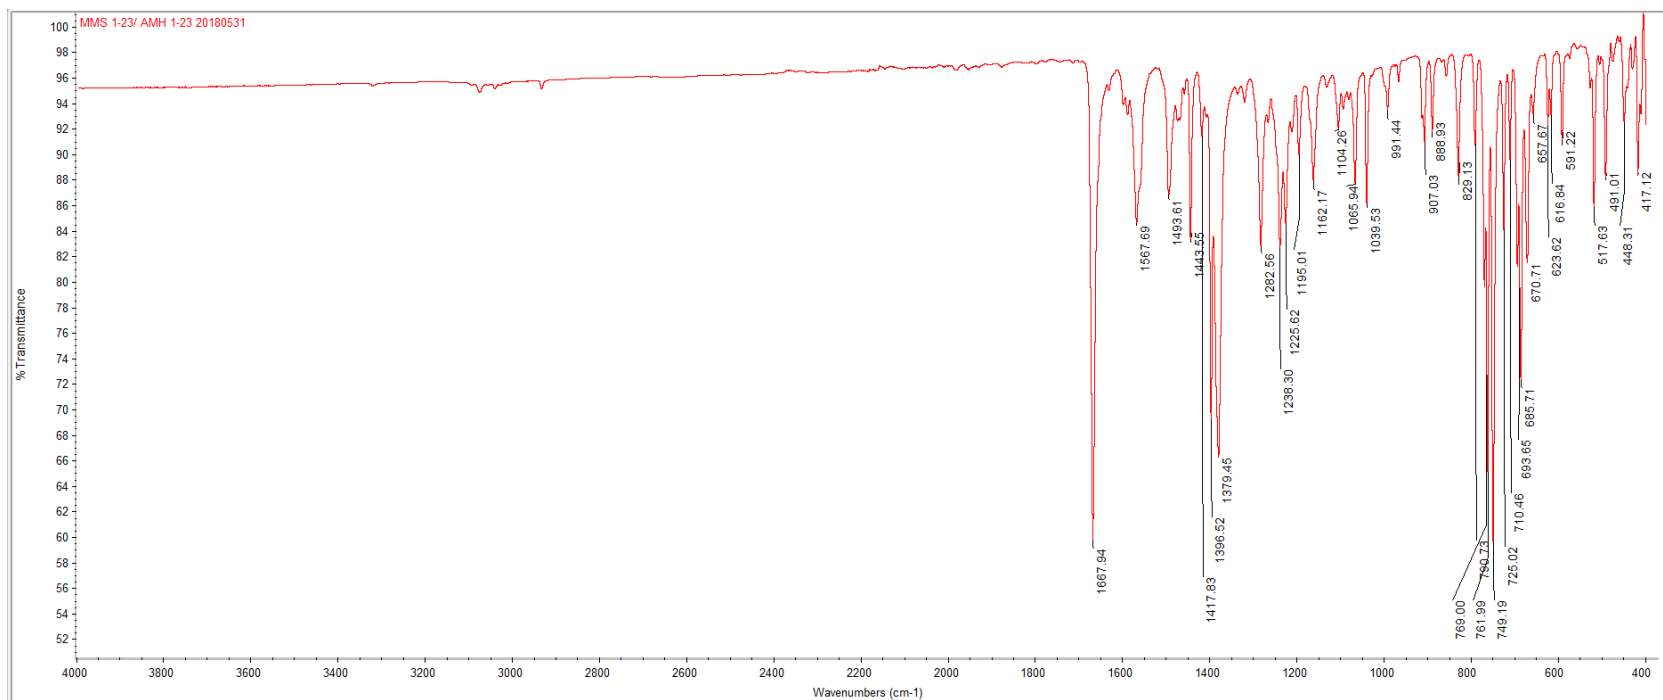

**Figure S38.** FT-IR spectrum of compound **1h** (*p*-F).

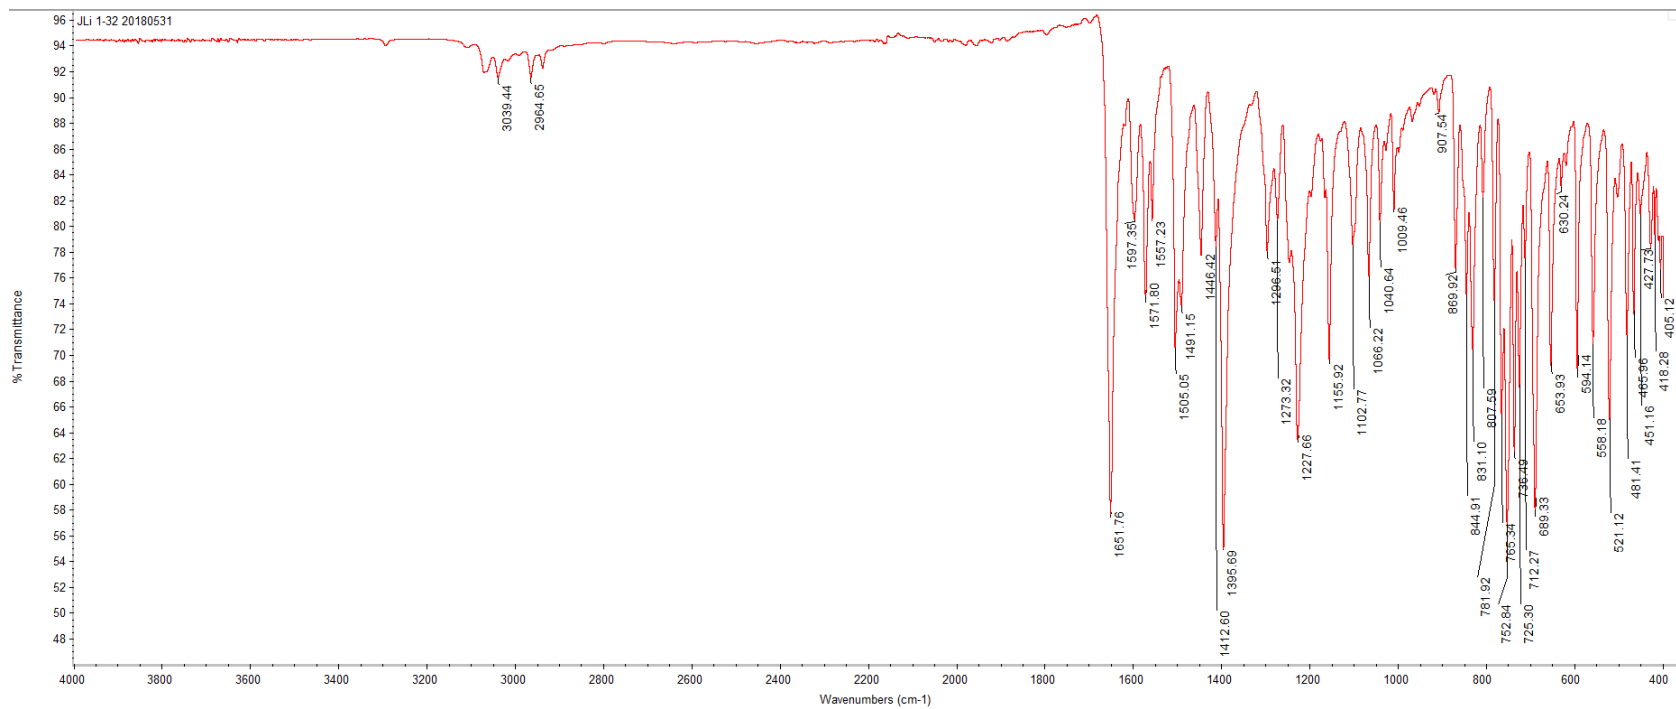

**Figure S39.** FT-IR spectrum of compound **1i** (*m*-F).

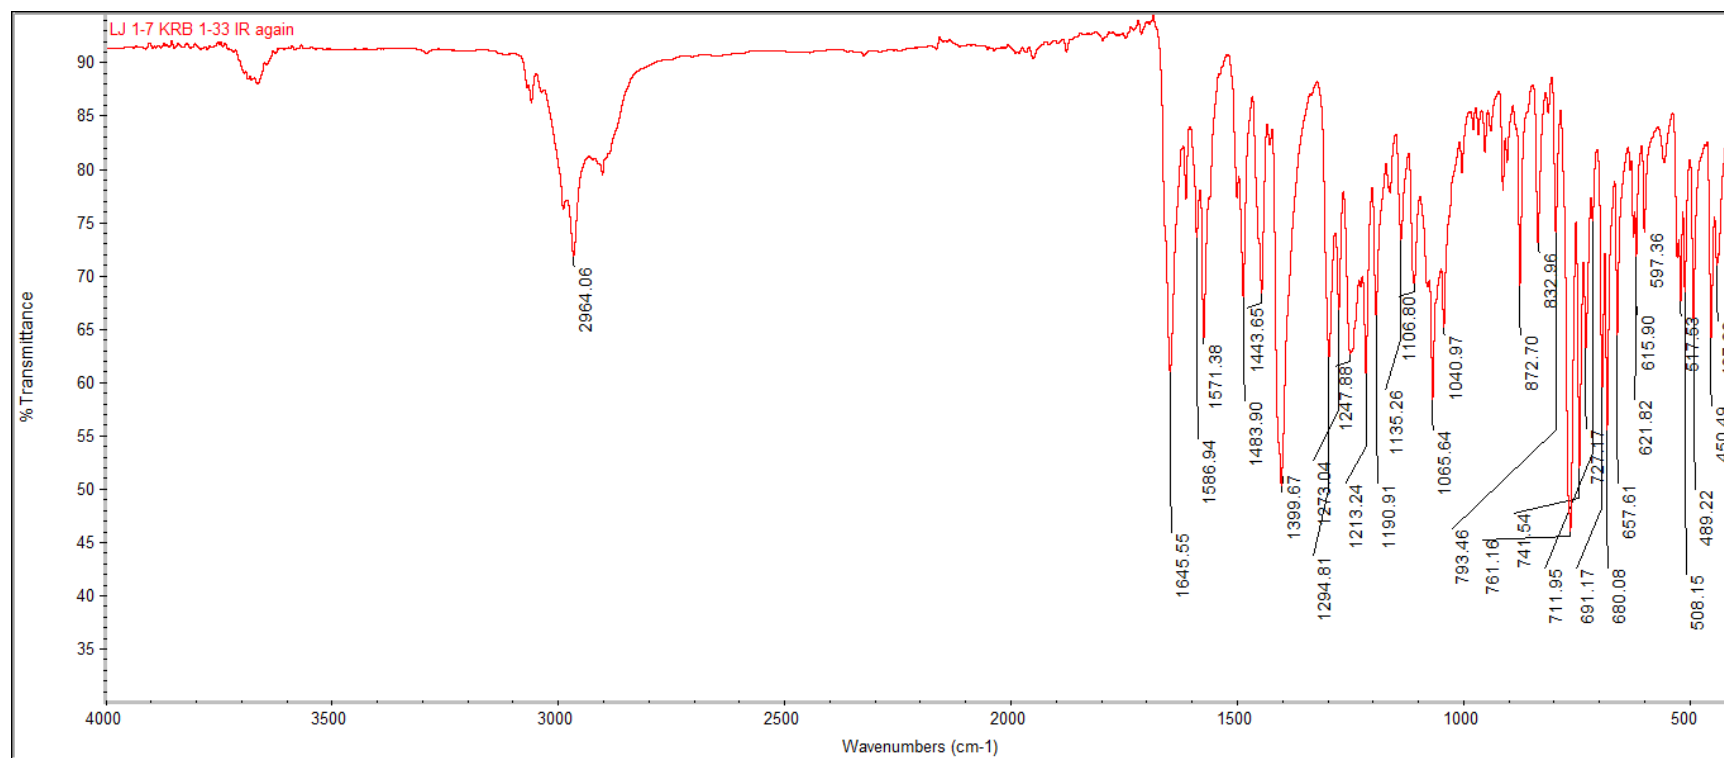

Figure S40. FT-IR spectrum of compound **1k** (*p*-Me).

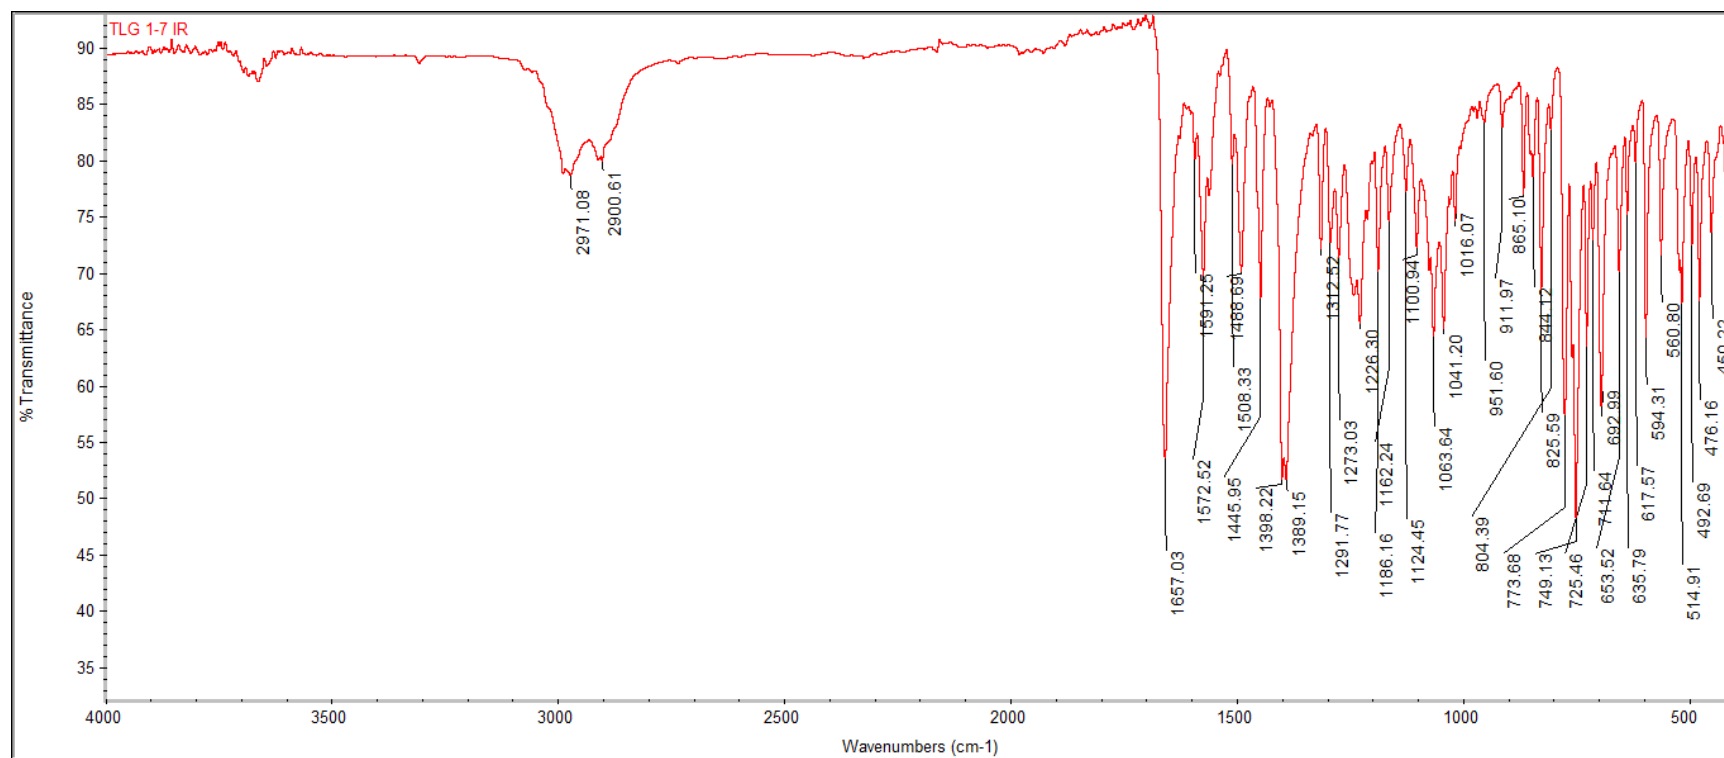

**Figure S41.** FT-IR spectrum of compound **1l** (*m*-Me).

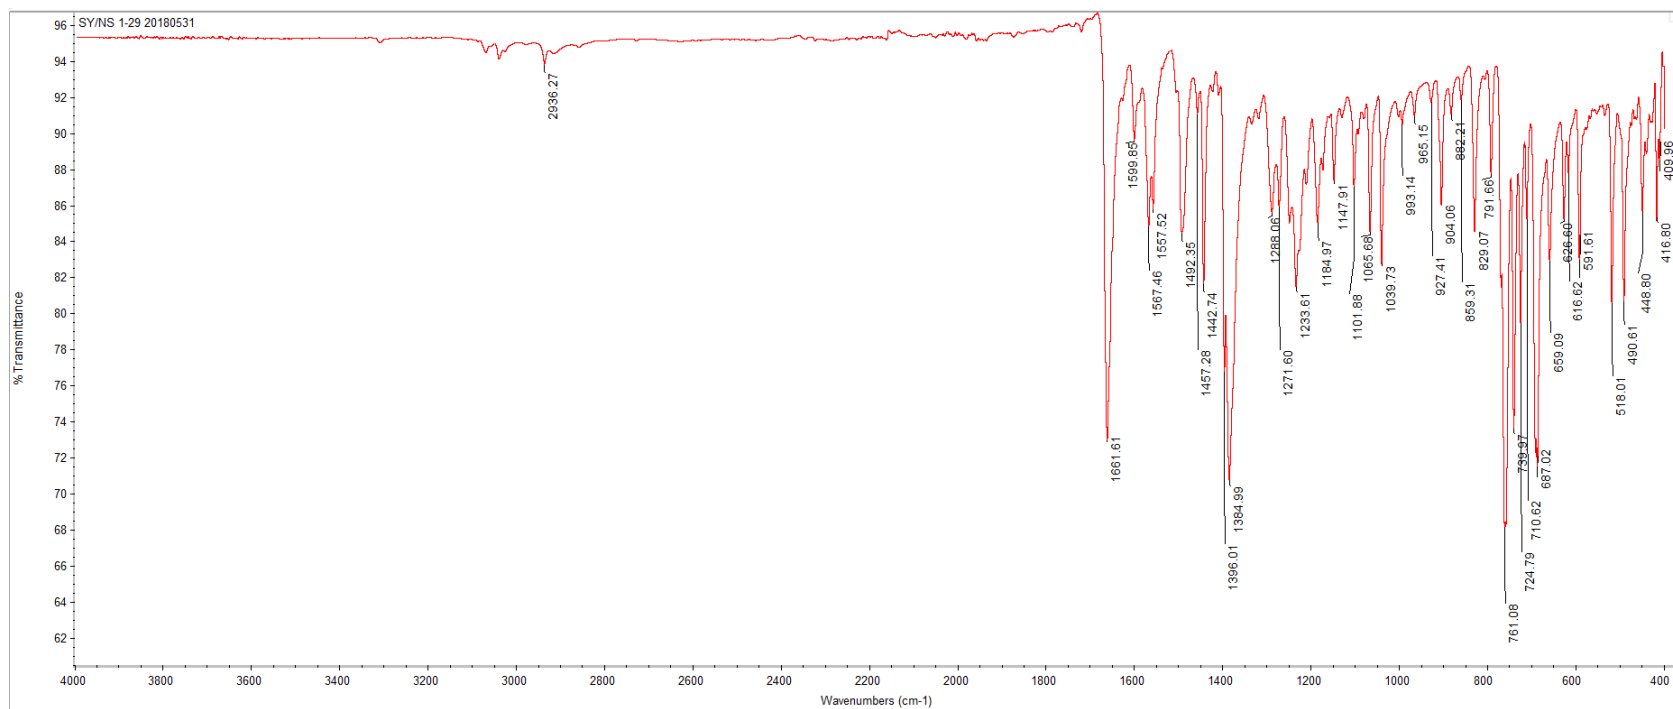

**Figure S42.** FT-IR spectrum of compound **1m** (*p*-OMe).

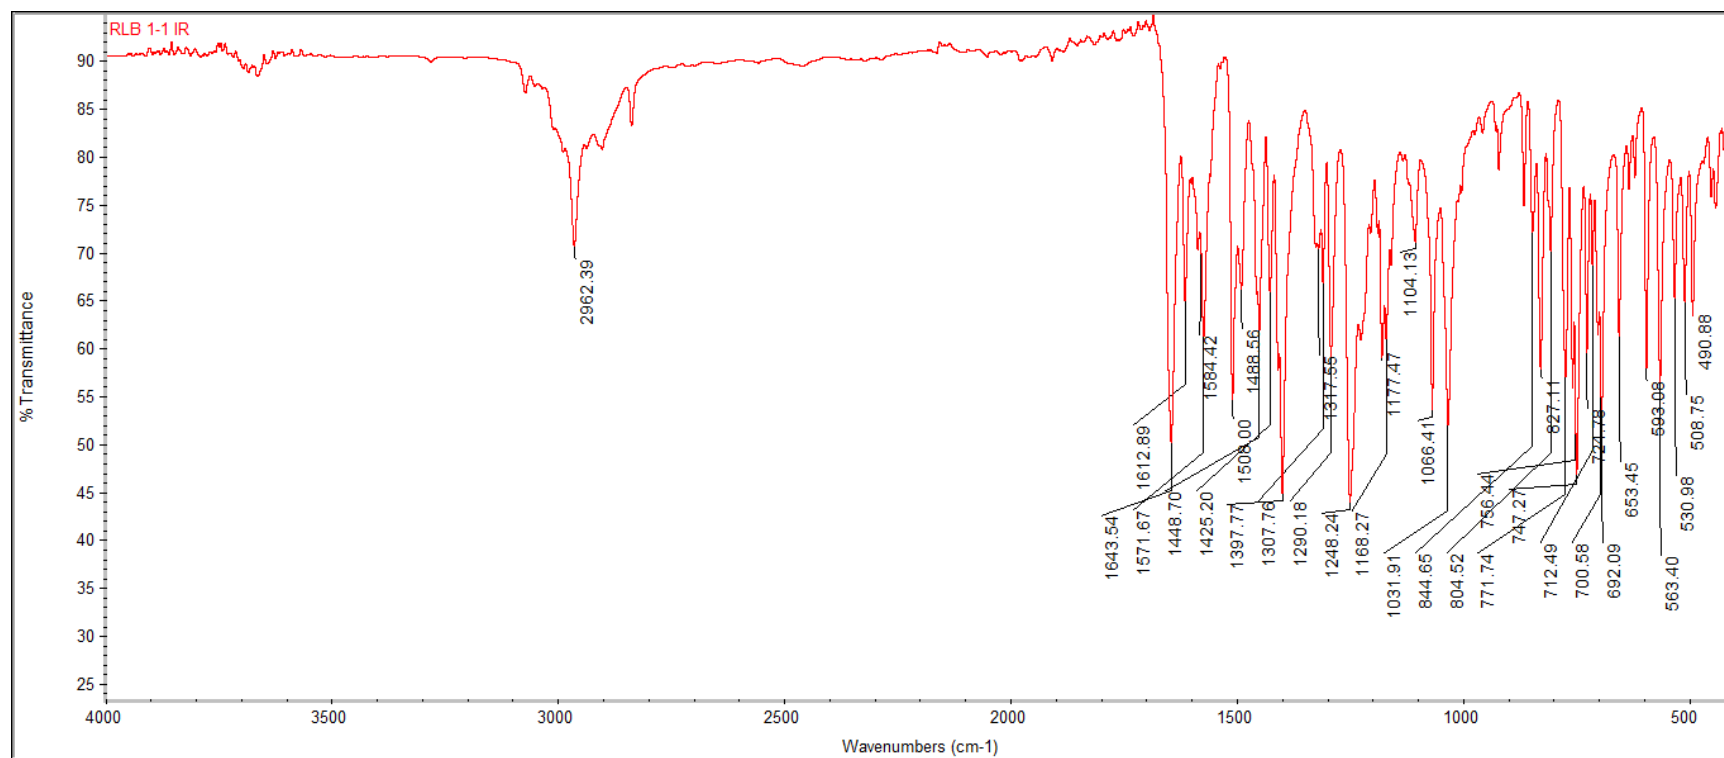

**Figure S43.** FT-IR spectrum of compound **1n** (*m*-OMe).

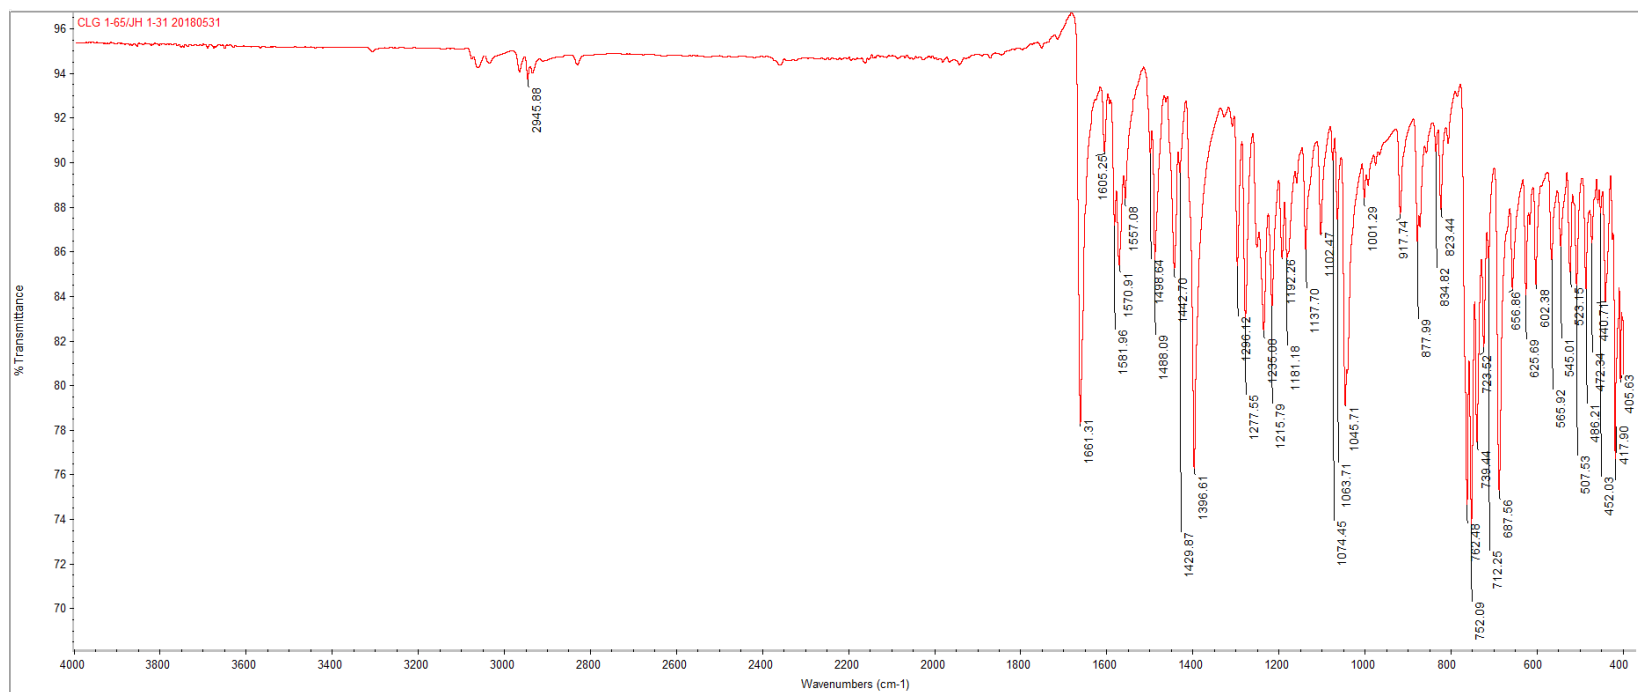

**Figure S44.** Mass spectrum of compound **1a** (*p*-NO<sub>2</sub>).

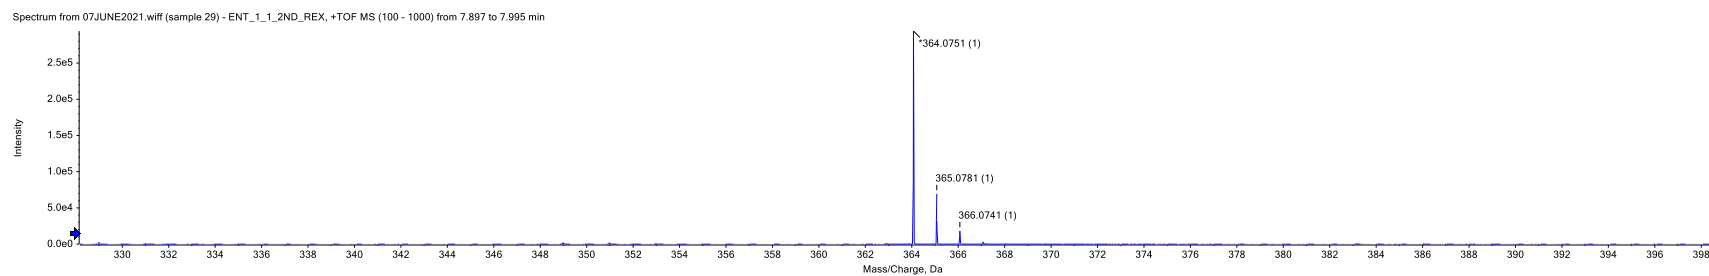

[M+H]<sup>+</sup> 364.0751Da

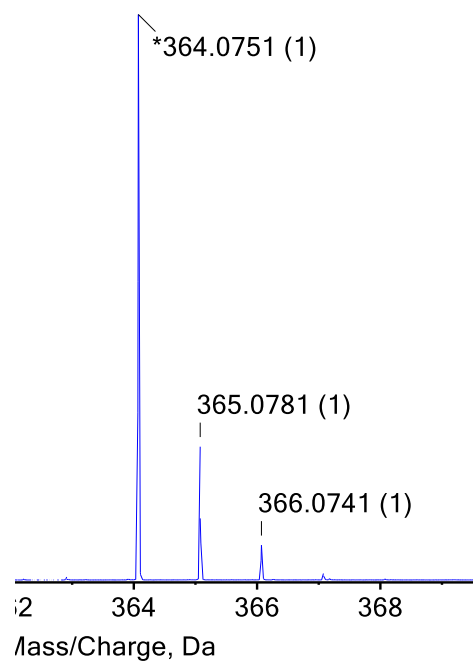

**Figure S45.** Mass spectrum of compound **1b** (*m*-NO<sub>2</sub>).

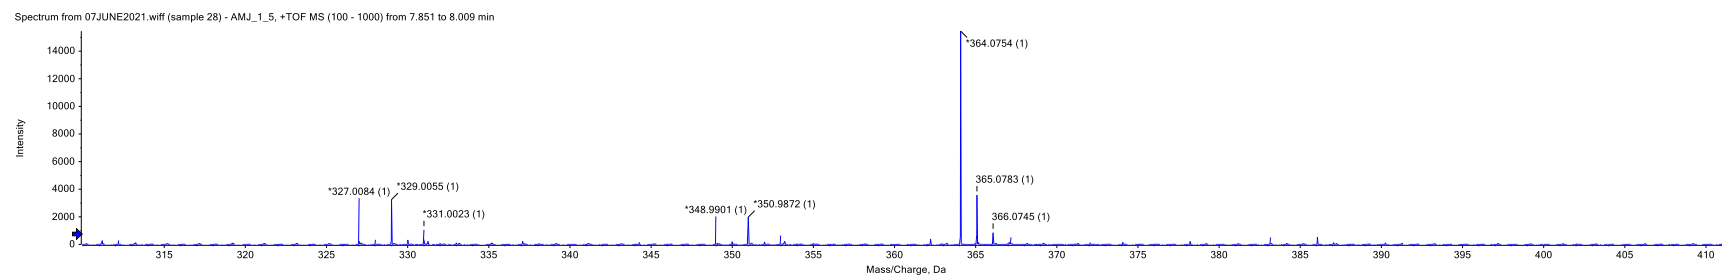

[M+H]<sup>+</sup> 364.0754Da

3 (100 - 1000) from 7.851 to 8.009 min

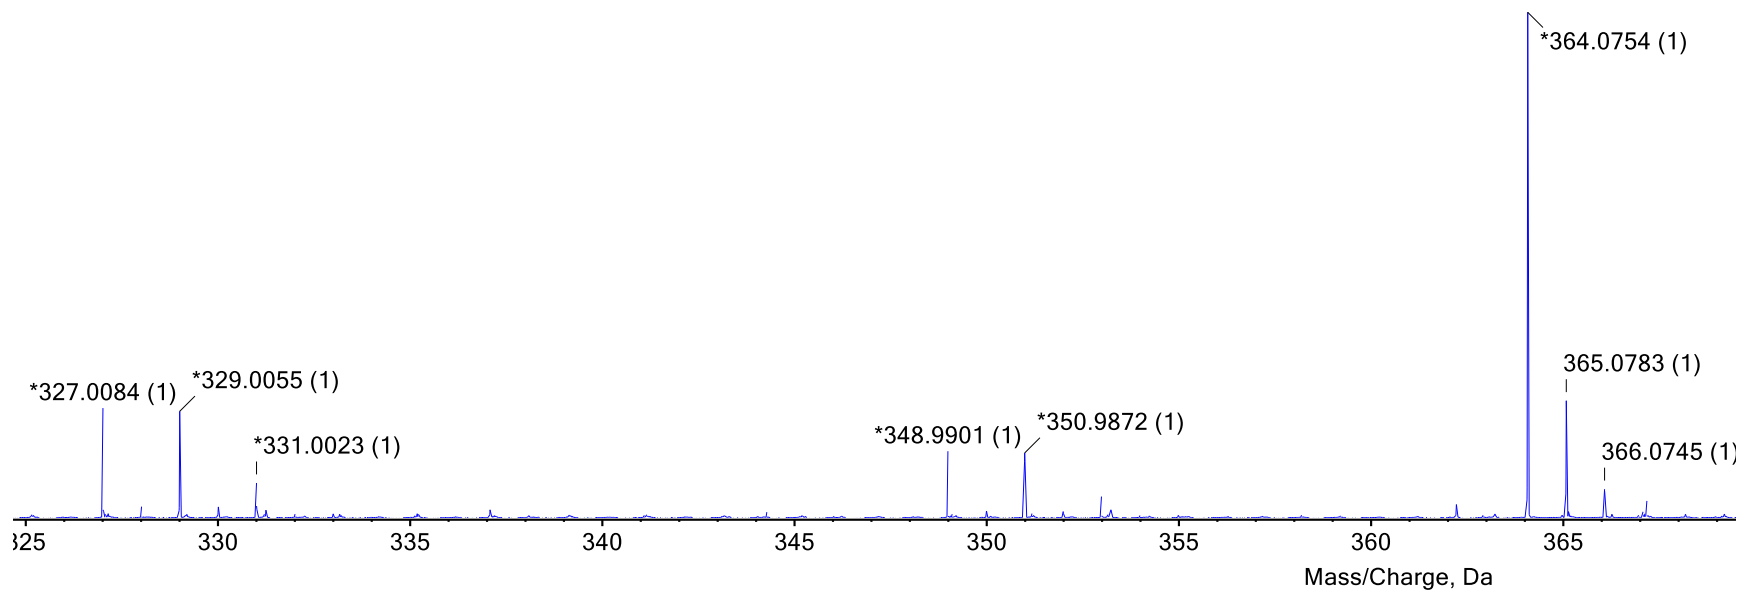

**Figure S46.** Mass spectrum of compound **1c** (*o*-NO<sub>2</sub>).

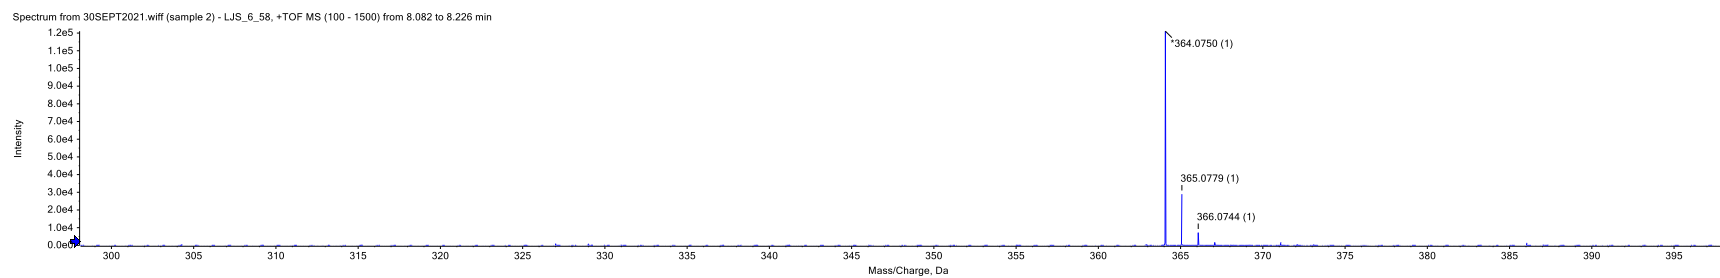

[M+H]<sup>+</sup> 364.0750

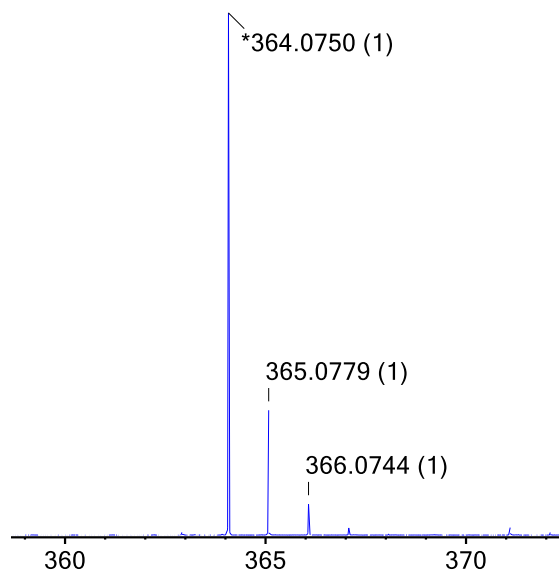

**Figure S47.** Mass spectrum of compound **1d** (*p*-CF<sub>3</sub>).

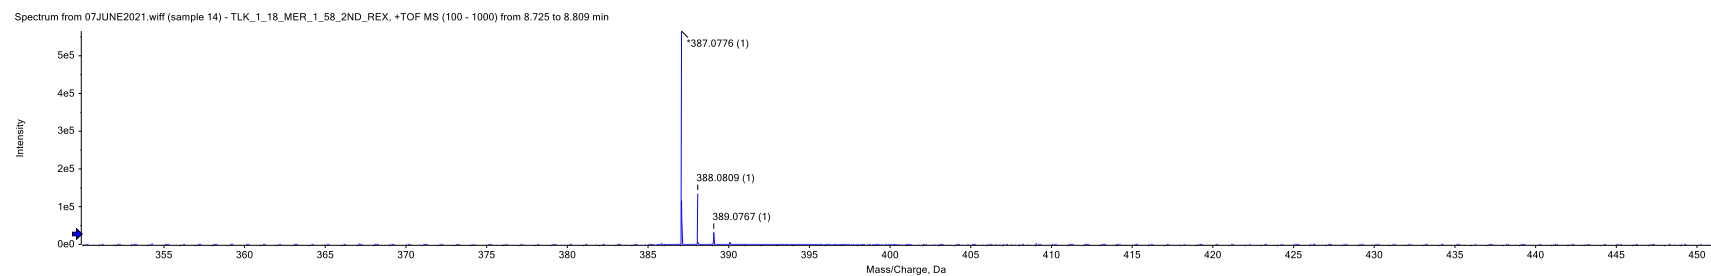

[M+H]<sup>+</sup> 387.0076Da

o 8.809 min

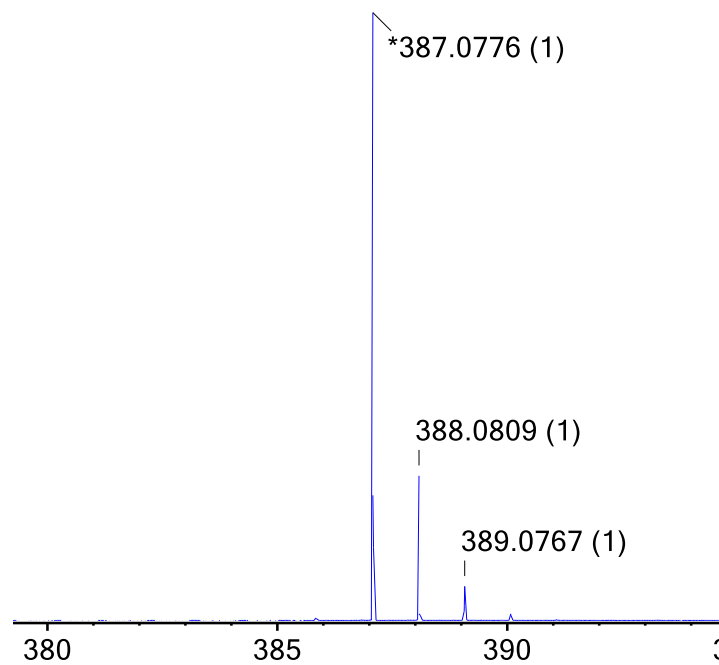

**Figure S48.** Mass spectrum of compound **1e** (*m*-CF<sub>3</sub>).

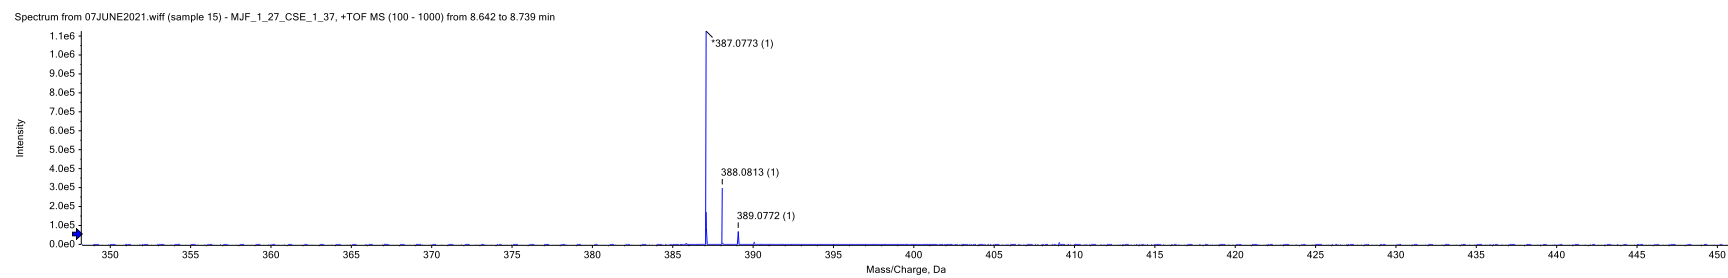

[M+H]<sup>+</sup> 387.0773Da

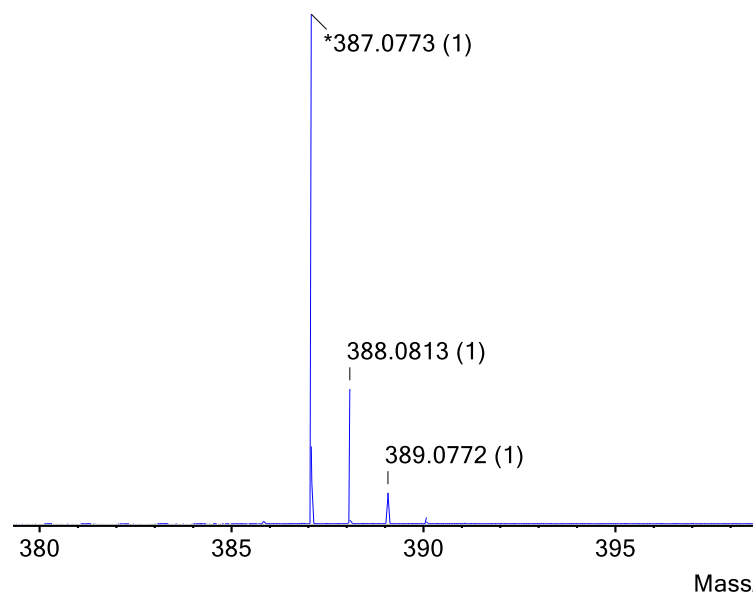

**Figure S49.** Mass spectrum of compound **1f** (*p*-Br).

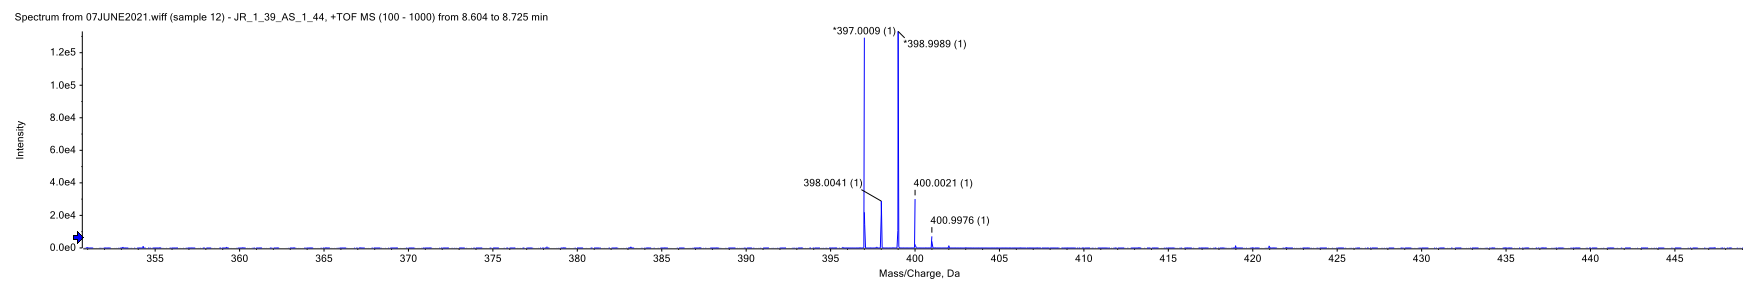

$[M+H]^+$  397.0009Da

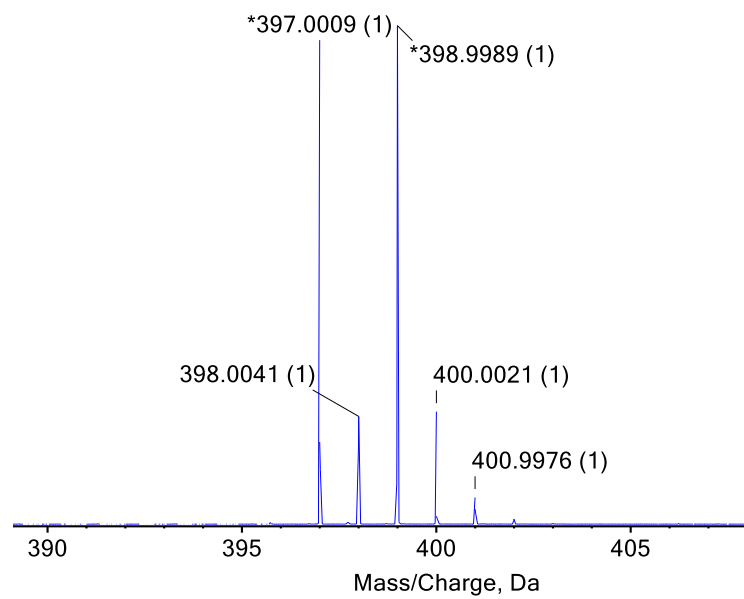

**Figure S50.** Mass spectrum of compound **1g** (*m*-Br).

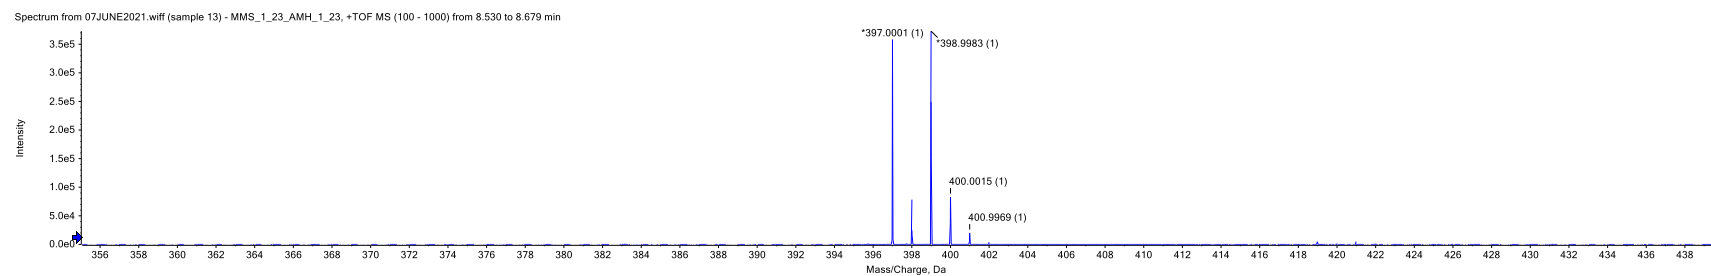

$[M+H]^+$  397.0001Da

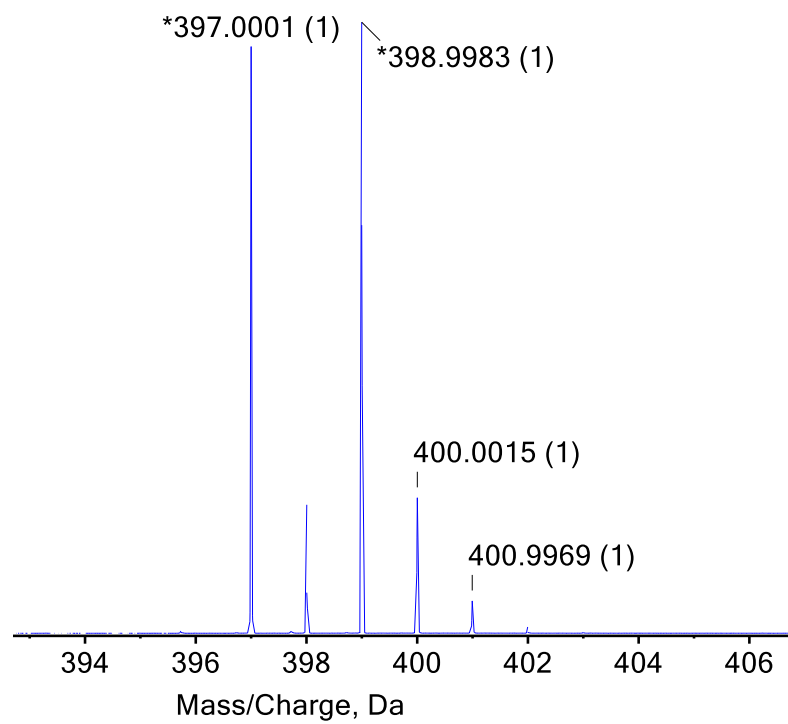

**Figure S51.** Mass spectrum of compound **1h** (*p*-F).

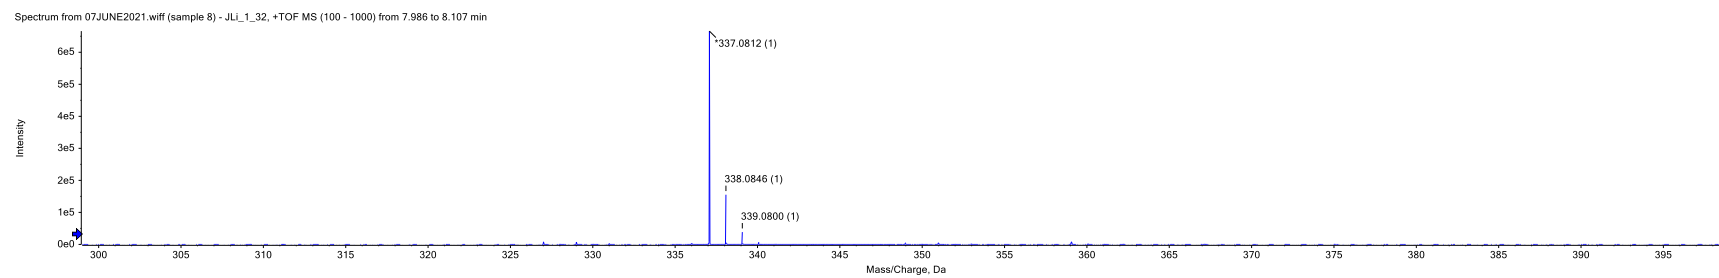

$[M+H]^+$  337.0812Da

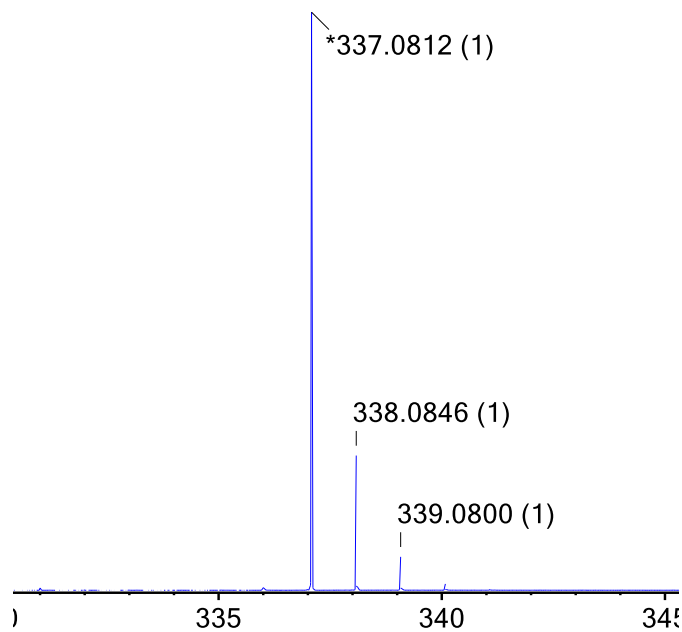

**Figure S52.** Mass spectrum of compound **1i** (*m*-F).

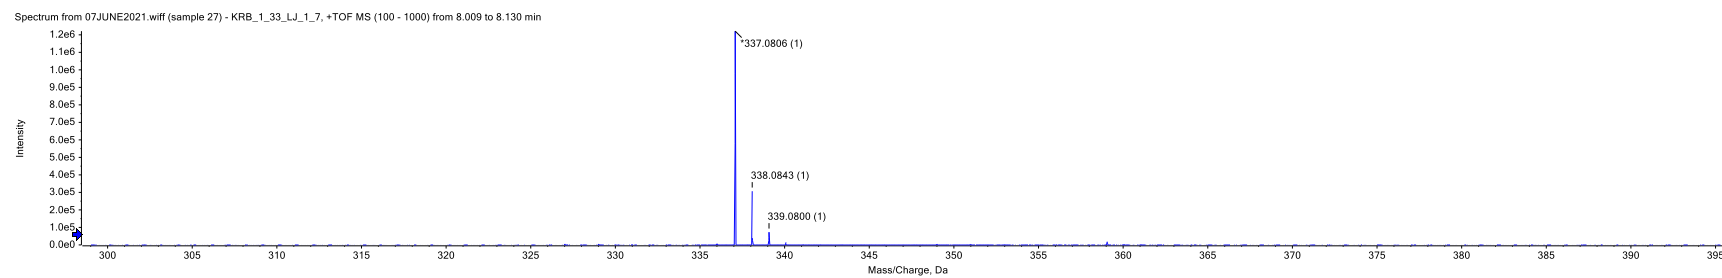

$[M+H]^+$  337.0806Da

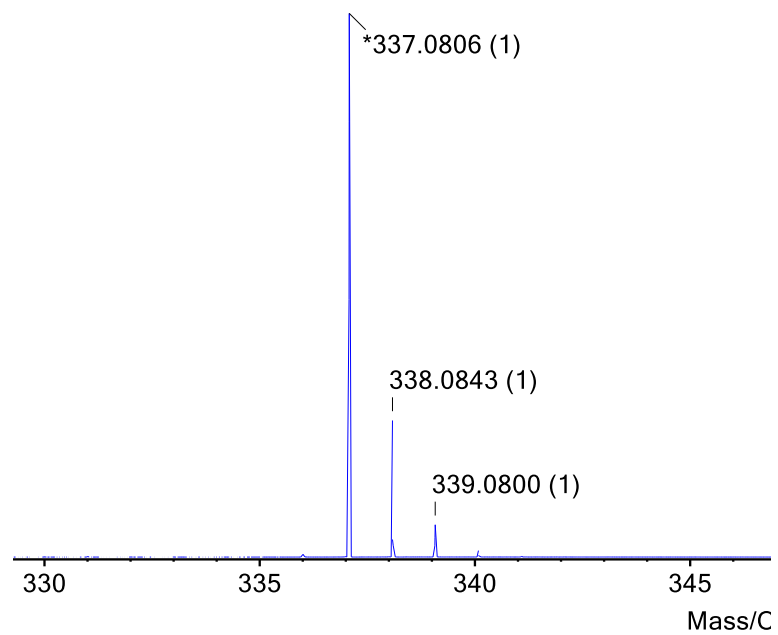

**Figure S53.** Mass spectrum of compound **1k** (*p*-Me).

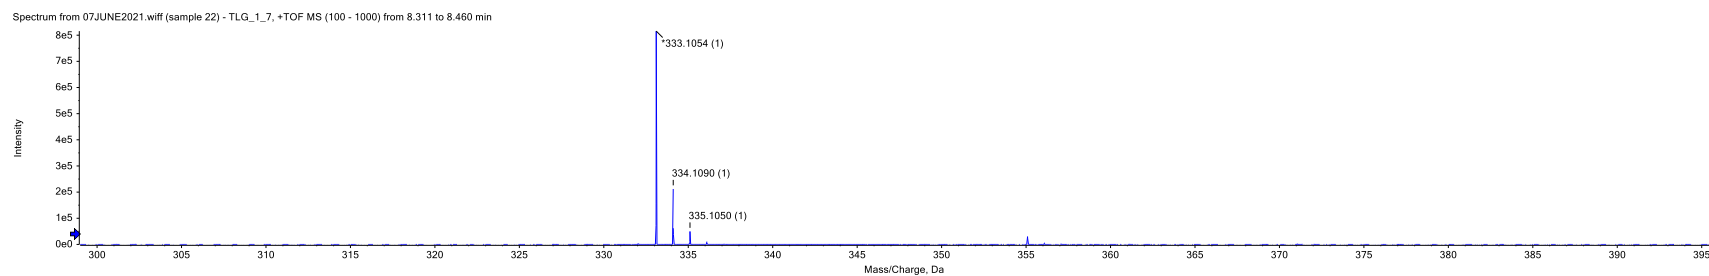

$[M+H]^+$  333.1054Da

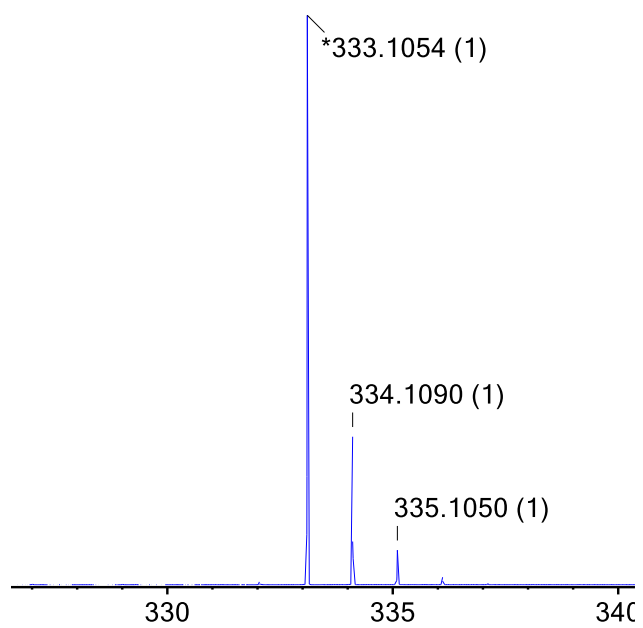

**Figure S54.** Mass spectrum of compound **1l** (*m*-Me).

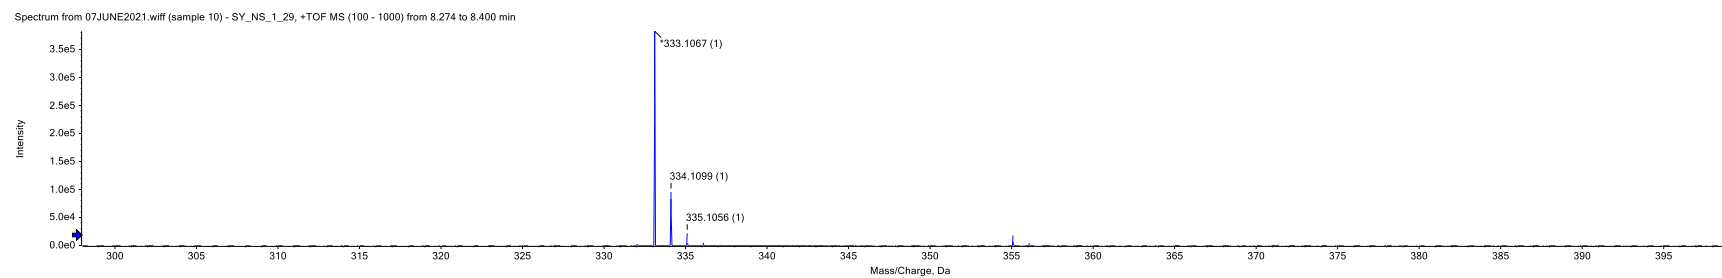

$[M+H]^+$  333.1067Da

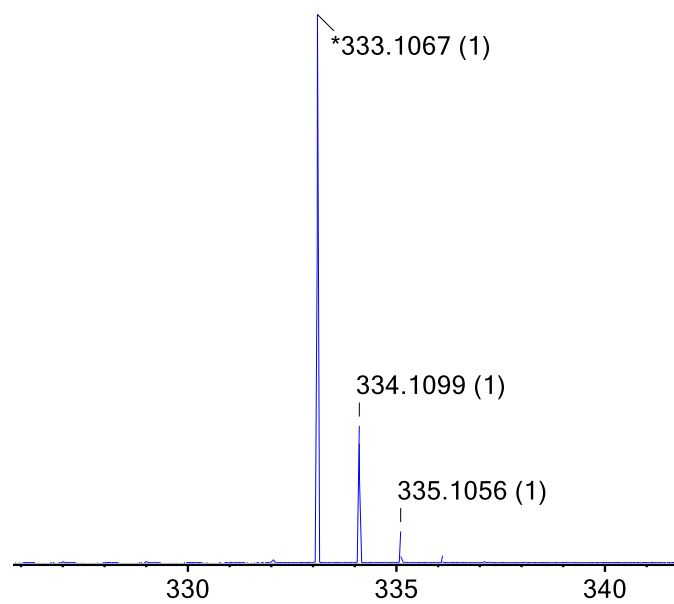

**Figure S55.** Mass spectrum of compound **1m** (*p*-OMe).

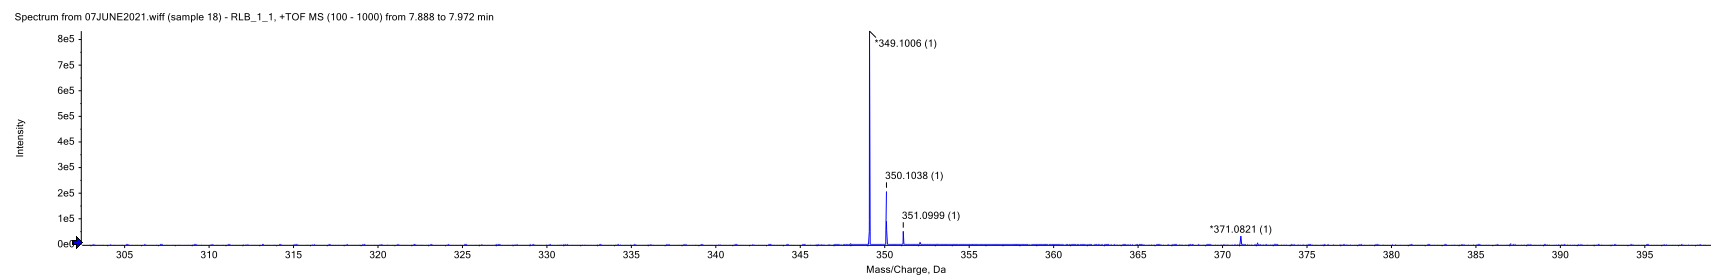

$[M+H]^+$  349.1006Da

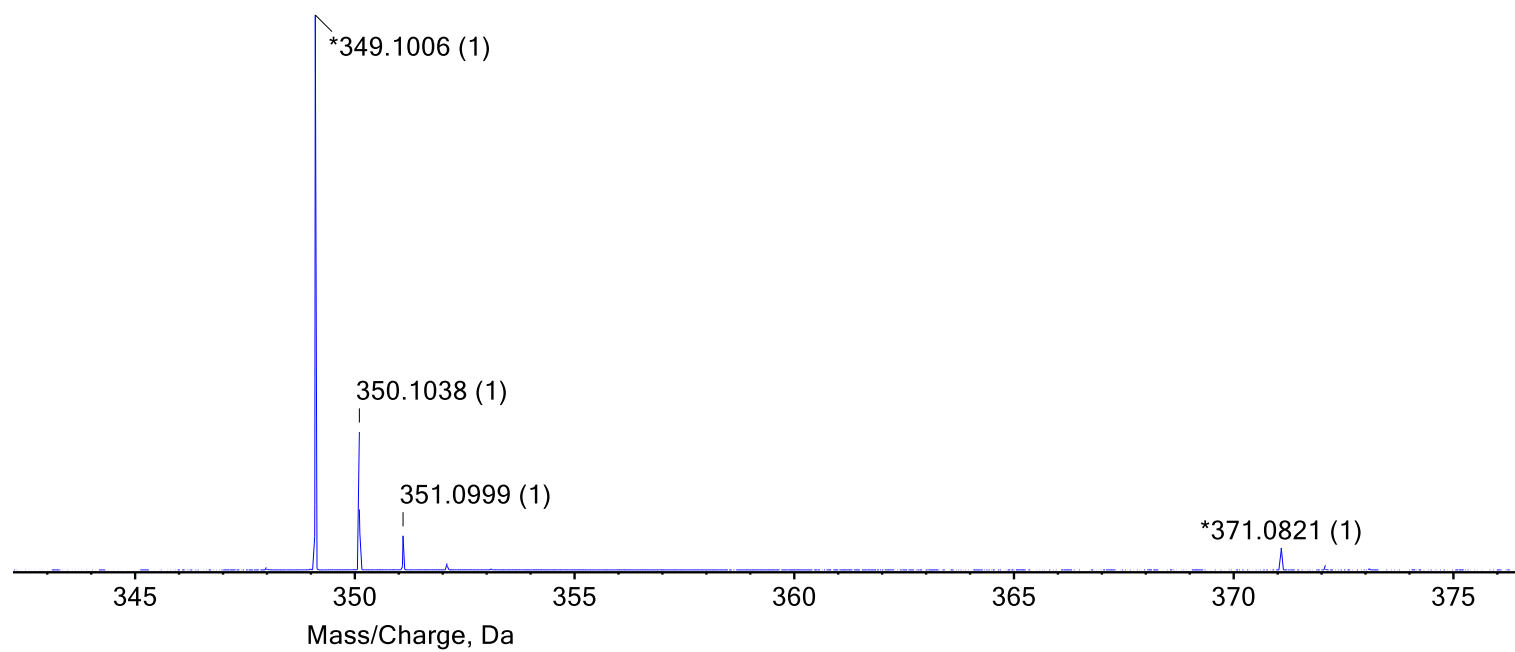

**Figure S56.** Mass spectrum of compound **1n** (*m*-OMe).

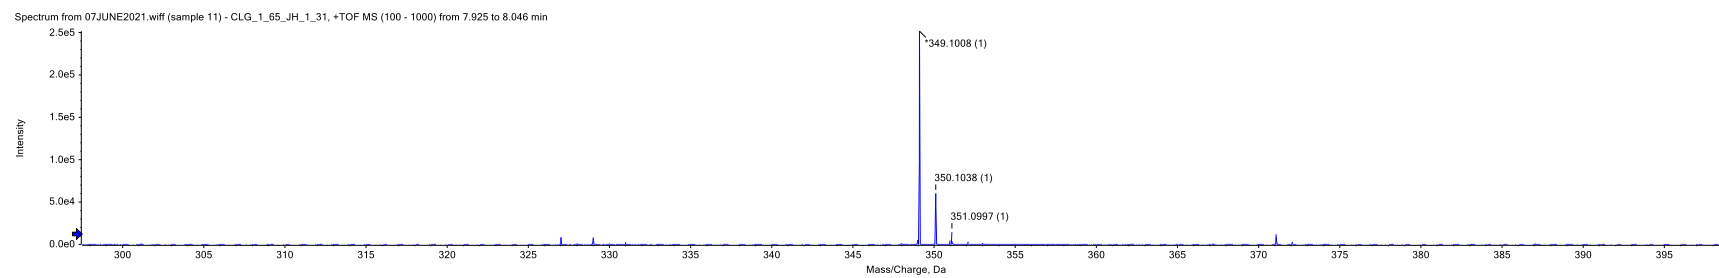

$[M+H]^+$  349.1008Da

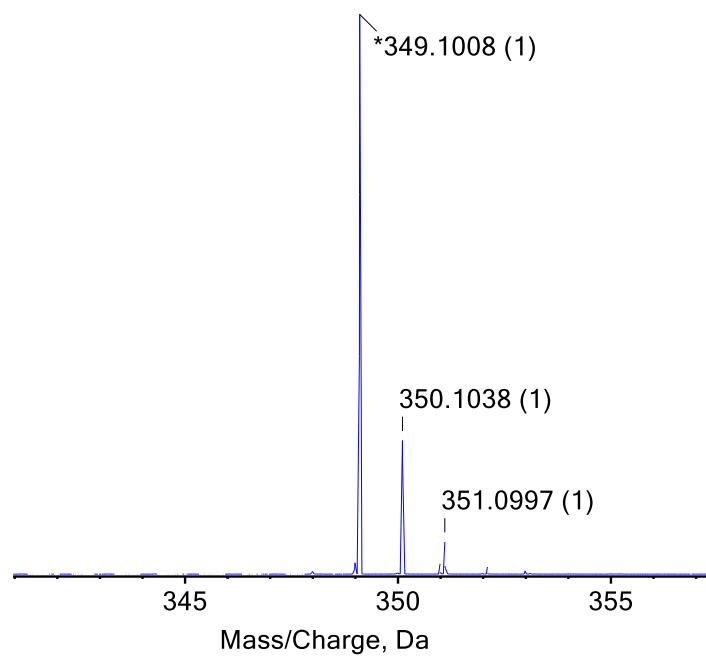

**Table S1.** TbBSF 90-13 growth curve data with 50 uM pyridothiazinones **1a-1n**. Cell densities are shown in parasites/mL in the following table. "R1" = Run 1, etc.

| Hours        | 0        | 18       | 42       | 66       |
|--------------|----------|----------|----------|----------|
| DMSO R1      | 2.33E+05 | 1.75E+06 | 5.35E+06 | 2.85E+06 |
| DMSO R2      | 2.33E+05 | 2.07E+06 | 4.80E+06 | 2.15E+06 |
| DMSO R3      | 2.33E+05 | 1.58E+06 | 5.30E+06 | 1.85E+06 |
| DMSO R4      | 2.67E+05 | 1.10E+06 | 5.60E+06 | 2.62E+06 |
| <b>1a</b> R1 | 2.33E+05 | 1.24E+06 | 3.80E+06 | 3.25E+06 |
| <b>1a</b> R2 | 2.33E+05 | 1.19E+06 | 3.40E+06 | 3.60E+06 |
| <b>1a</b> R3 | 2.33E+05 | 1.18E+06 | 3.10E+06 | 2.90E+06 |
| <b>1b</b> R1 | 2.33E+05 | 1.36E+06 | 3.02E+06 | 3.15E+06 |
| <b>1b</b> R2 | 2.33E+05 | 1.23E+06 | 3.33E+06 | 2.86E+06 |
| <b>1b</b> R3 | 2.33E+05 | 1.26E+06 | 3.48E+06 | 3.23E+06 |
| <b>1c</b> R1 | 2.67E+05 | 5.20E+05 | 8.10E+05 | 1.32E+06 |
| <b>1c</b> R2 | 2.67E+05 | 6.50E+05 | 1.17E+06 | 1.37E+06 |
| <b>1c</b> R3 | 2.67E+05 | 4.20E+05 | 9.10E+05 | 1.22E+06 |
| <b>1d</b> R1 | 2.33E+05 | 0.00E+00 | 0.00E+00 | 0.00E+00 |
| <b>1d</b> R2 | 2.33E+05 | 1.00E+04 | 0.00E+00 | 0.00E+00 |
| <b>1d</b> R3 | 2.33E+05 | 0.00E+00 | 0.00E+00 | 0.00E+00 |
| <b>1e</b> R1 | 2.33E+05 | 0.00E+00 | 0.00E+00 | 0.00E+00 |
| <b>1e</b> R2 | 2.33E+05 | 1.00E+04 | 1.00E+04 | 0.00E+00 |
| <b>1e</b> R3 | 2.33E+05 | 0.00E+00 | 0.00E+00 | 0.00E+00 |
| <b>1f</b> R1 | 2.33E+05 | 0.00E+00 | 0.00E+00 | 0.00E+00 |
| <b>1f</b> R2 | 2.33E+05 | 0.00E+00 | 0.00E+00 | 0.00E+00 |
| <b>1f</b> R3 | 2.33E+05 | 0.00E+00 | 0.00E+00 | 0.00E+00 |
| <b>1g</b> R1 | 2.33E+05 | 0.00E+00 | 0.00E+00 | 0.00E+00 |
| <b>1g</b> R2 | 2.33E+05 | 1.00E+04 | 0.00E+00 | 0.00E+00 |
| <b>1g</b> R2 | 2.33E+05 | 0.00E+00 | 0.00E+00 | 0.00E+00 |

|              |          |          |          |          |
|--------------|----------|----------|----------|----------|
| <b>1h R1</b> | 2.33E+05 | 1.17E+06 | 2.47E+06 | 2.80E+06 |
| <b>1h R2</b> | 2.33E+05 | 1.08E+06 | 2.73E+06 | 2.80E+06 |
| <b>1h R3</b> | 2.33E+05 | 9.70E+05 | 2.82E+06 | 2.35E+06 |
| <b>1i R1</b> | 2.33E+05 | 1.21E+06 | 2.83E+06 | 2.60E+06 |
| <b>1i R2</b> | 2.33E+05 | 9.60E+05 | 2.06E+06 | 2.55E+06 |
| <b>1i R3</b> | 2.33E+05 | 1.02E+06 | 2.06E+06 | 2.91E+06 |
| <b>1j R1</b> | 2.33E+05 | 1.40E+06 | 3.17E+06 | 2.63E+06 |
| <b>1j R2</b> | 2.33E+05 | 1.21E+06 | 3.95E+06 | 3.36E+06 |
| <b>1j R3</b> | 2.33E+05 | 1.37E+06 | 3.65E+06 | 3.69E+06 |
| <b>1k R1</b> | 2.33E+05 | 5.00E+04 | 2.00E+04 | 5.00E+04 |
| <b>1k R2</b> | 2.33E+05 | 0.00E+00 | 0.00E+00 | 0.00E+00 |
| <b>1k R3</b> | 2.33E+05 | 0.00E+00 | 0.00E+00 | 2.00E+04 |
| <b>1l R1</b> | 2.33E+05 | 5.00E+05 | 8.20E+05 | 1.35E+06 |
| <b>1l R2</b> | 2.33E+05 | 5.20E+05 | 6.50E+05 | 1.24E+06 |
| <b>1l R3</b> | 2.33E+05 | 7.00E+05 | 1.31E+06 | 1.91E+06 |
| <b>1m R1</b> | 2.33E+05 | 7.50E+05 | 1.53E+06 | 2.74E+06 |
| <b>1m R2</b> | 2.33E+05 | 1.25E+06 | 2.68E+06 | 3.09E+06 |
| <b>1m R3</b> | 2.33E+05 | 1.19E+06 | 2.27E+06 | 3.12E+06 |
| <b>1n R1</b> | 2.33E+05 | 1.39E+06 | 2.02E+06 | 2.45E+06 |
| <b>1n R2</b> | 2.33E+05 | 1.22E+06 | 2.32E+06 | 2.80E+06 |
| <b>1n R3</b> | 2.33E+05 | 1.10E+06 | 2.36E+06 | 2.77E+06 |
